# Supplementary material for: Elevated Histamine Etiology Model for Most Major Vaccine Associated Adverse Events including SARS-CoV-2 Spike Vaccines
Source: Research Square preprint supplement (doi:10.21203/rs.3.rs-1502384/v1), 2022-03-30
Supplement: Supplementary file 1 [file 5c03fc167c0765f271dd5d64.xlsx]

## Sheet: VAERS_matrix
Symptom	DTP	OPV	TD	MMR	RUB	FLU3	DT	HIBV	HEP	RAB	TYP	YF	TTOX	FLUX	PPV	MEA	MER	HBPV	MU	CHOL	SMALL	UNK	IPV	MEN	PLAGUE	MUR	BCG	MM	DTAP	ADEN	ANTH	DTPHIB	JEV	PER	HEPA	VARCEL	JEVX	HBHEPB	TBE	RV	DTPPHIB	DTPIPV	LYME	DTAPH	DTPIHI	PNC	DTOX	DPP	HEPAB
Headache	320	362	1593	2324	73	7095	159	164	4331	907	1255	633	316	2858	3486	51	21	1	16	42	671	2329	674	619	3	1	20	5	770		1370	15	79	14	1752	1535	13	7	37		3	20	401	4	4	83	13	15	532
Fatigue	67	28	514	1175	14	3570	46	336	1787	295	546	283	148	1702	2157	15	4	3	7	26	408	1939	472	261	2	2	23	3	670		853	3	23	12	1079	763	7	27	8	1	4	10	476	11	2	182	6	11	416
Pyrexia	10865	10358	3593	21577	215	12701	658	18497	11080	944	1573	860	587	5078	14237	253	78	77	55	58	869	3051	8879	1183	12	10	165	42	12785		965	2651	81	40	5630	11885	36	1739	37	196	68	171	285	231	62	8057	20	64	630
Chills	323	326	978	843	21	6214	97	392	1450	283	681	262	160	2160	4832	16	6	3	3	24	303	1504	293	200	3	2	28		446		408	74	30	12	599	368	3	15	12			4	111	5	1	118	4	10	190
Pain	763	747	2858	3254	99	11338	243	942	3934	464	776	402	555	3499	9300	24	21	3	12	28	600	2100	1507	341	3	1	24	5	2184		1158	98	40	18	1460	1833	8	95	9	22	3	14	513	30	7	454	7	19	424
Nausea	228	215	1235	1465	21	5637	115	179	4053	732	1116	412	271	1849	3260	33	9		8	35	327	1351	497	327	4	4	15	3	580		763	16	61	11	1531	991	6	15	9	1	1	7	132	2	3	89	4	11	473
Dizziness	92	103	1068	1322	28	5630	103	78	3560	501	677	316	238	1707	1905	29	9		1	20	217	1184	383	354	5	3	9	7	329		663	3	50	4	1910	1088	4	5	12			3	158	1		40	4	8	450
Pain in extremity	70	21	467	738	3	8148	48	180	891	188	302	106	153	2206	8162	4	1		1	11	86	1320	381	164		2	7	3	674		295		10	12	827	799	2	3	13		4	14	74	3	1	126	9	10	313
Myalgia	320	352	1728	1142	71	4583	163	158	3358	498	535	305	279	1764	2928	40	15		4	23	321	848	261	170	3		14	1	303		774	36	26	5	644	353	5	7	20	1		2	391	3		52	5	6	241
Arthralgia	142	143	859	1918	275	2709	69	128	3064	382	449	173	173	1103	1733	33	23		10	29	212	890	296	141	2	3	20	5	325	1	1186	5	18	4	615	364	4	5	10		2	3	1032	1	3	46	9	7	265
SARS-CoV-2 test	1			8				6	3	10	1	1	1	37	13						1	385		1			4		3		1				47	9
Dyspnoea	572	634	536	1535	14	4558	92	1043	2141	249	419	274	107	1506	1744	20	4	1	5	14	416	984	798	209	2	2	30	1	855	1	490	164	37	10	767	785	6	77	7	3	3	12	42	10	8	454	8	8	242
Rash	1871	2280	1251	11857	242	5332	207	4976	5400	360	753	316	191	1304	2965	126	36	34	11	17	643	1102	2688	302	3	3	42	13	4332		862	434	65	13	3168	8611	6	588	3	30	12	43	181	77	8	2326	7	17	334
Injection site pain	1003	1088	3537	3962	14	11051	323	1457	3339	288	492	218	505	2495	13096	25	9	7	9	16	242	973	2615	277	4	4	10	1	4306		940	224	21	12	1918	3520	7	120	2	1	6	23	154	15	4	718	16	15	331
Pruritus	344	618	1806	4351	64	6293	178	765	3882	439	664	403	284	1232	2396	44	16	12	8	8	567	782	2073	222	1		11	4	2785	1	1123	61	92	3	1674	4256	3	78	2		14	35	63	20	2	380	7	10	317
Asthenia	289	285	867	1216	57	4039	100	450	3465	297	482	216	177	1685	1685	32	11		6	22	116	812	443	235	3		10	3	450	1	441	50	19	6	793	573	3	20	21	5	4	23	169	7	2	176	9	8	236
Vomiting	2016	2008	743	3906	27	4179	160	4223	4183	410	703	269	151	1627	2170	39	14	14	10	26	170	887	2400	369	2	2	48	6	3280	1	353	435	37	17	1832	2028	11	325	10	177	21	50	35	40	25	2093	7	22	254
Malaise	474	496	695	1479	49	3196	85	648	2142	303	448	243	129	2067	2357	23	5	2	9	15	285	629	460	236	3	1	12	2	547		396	92	25	7	783	732	5	40	7	8	9	18	90	7	7	233	6	5	263
Body temperature	4		6	62		64	1	51	37	3	8	2	2	28	77						1	265	35	5					51		4				34	66		1	1						2	51			10
Paraesthesia	58	56	760	646	53	3355	66	26	2359	421	296	178	143	988	760	10	7	2	3	11	96	369	160	132	1		3	2	110		455	3	35	1	498	271	3	2	9		1	3	235	2		9	5	3	293
Chest pain	21	34	283	312	8	1429	26	17	856	113	225	85	52	456	600	8	2		4	7	749	346	79	81		1	3		79		440	2	17	1	250	183	4		3			1	63	1		13	3		67
Diarrhoea	698	626	273	1996	24	2272	59	2473	2393	202	702	205	71	972	993	30	5	10	2	34	111	749	1219	177	2	1	30	2	1597		334	156	24	10	867	885	8	225	5	214	11	27	47	25	13	1399	6	20	198
Hypoaesthesia	17	13	334	314	9	2751	23	17	959	237	212	111	94	645	668	4	1	1	2	5	92	382	119	94	1		4	1	105		407	1	17	1	419	218	1	3	4			4	175			9	4	2	256
Lymphadenopathy	208	254	486	1983	124	1010	49	354	872	150	202	87	83	347	661	39	17	4	9	3	475	308	238	70			46	2	458	2	224	36	12		303	475	5	34	2	2	3	6	31	6	3	122	3	4	86
Injection site erythema	314	100	2142	10959	14	11384	227	3799	2413	152	474	396	343	1453	14689	18	14	20	4	10	490	881	9545	295		3	23	9	14430		1164	36	29	7	4933	10678	10	582	1		8	58	27	134	7	3035	12	26	238
Erythema	218	71	1097	6044	8	8131	143	2041	1682	151	469	216	240	1338	11540	13	17	14	4	5	579	926	4881	230		3	29	10	6745		953	16	30	10	2894	5916	5	337	3	1	13	40	27	73	6	1775	11	10	262
Hyperhidrosis	190	260	487	709	7	2074	58	260	1336	144	272	141	106	603	971	15	5	1	3	14	126	347	255	99	3		6	1	283		230	42	19	3	616	356	4	15	8	2	1	7	51	2		101	3	1	169
Feeling abnormal	12	4	66	222	2	999	6	94	240	61	84	39	22	435	543	2				4	33	400	81	36				1	116		63		4	4	232	148	4	7	1		3	1	15			41	1	2	65
Vaccination site pain	25	1	9	58		222	1	60	37	3	22	8	2	108	335		2				16	167	33	17			5		50		32				26	60	1		2			7			4	7			7
Blood test	21	7	47	311	3	714	10	203	226	26	36	32	16	284	354	4				3	18	399	110	56		1	6		198		39	4	1	3	193	226	1	9	1	2	3	17	2	5	1	109	2	1	48
Urticaria	1013	1236	858	4795	32	5297	159	2916	3975	536	564	409	137	1253	1855	30	5	18	6	7	146	638	2513	247	2	1	16	2	3794	1	381	232	75	12	2460	3255	7	306	1	17	7	19	38	45	9	1607	9	6	270
Syncope	276	370	677	1388	7	1409	82	271	1398	106	307	106	76	412	476	20	4		1	8	46	328	504	231	1		13	1	450		118	54	22	3	1529	935	5	12	6	1	3	10	14	6	3	104	5	2	216
Injection site swelling	147	50	1124	5844	4	7781	120	1992	1479	84	293	200	229	1207	11630	9	10	5	4	3	183	656	4789	203		3	15	7	7650		666	18	16	6	3004	6748	8	240	2		8	35	14	76	1	1527	14	27	187
Peripheral swelling	13	1	71	259	1	1427	4	74	192	33	40	14	16	308	4248	1					10	462	84	45			4		187		58				173	249	2				1	3		1		18	1	3	46
Electrocardiogram	6	1	20	74		341	4	45	91	10	45	12	2	97	114					2	106	288	20	20			2		33		68		1	1	77	50	1	1	2		1		2		1	31			24
Cough	426	456	155	1968	12	4062	41	1037	987	59	137	91	33	1557	1066	23	10	9	5	1	127	553	776	118		1	47	8	1185		189	120	6	16	531	1164	4	101	5	10	10	13	31	13	8	574	1	5	79
Blood pressure measurement				1		3		1	2		1			2	2							289					2		1						4	1	1
Palpitations	12	2	72	86	1	619	6	10	303	60	78	36	16	237	178	1		1		1	106	189	35	25			3		31		112		2		115	54	1		3			1	26	1	3	8		2	56
Injection site pruritus	22	1	123	777		1909	10	193	298	24	102	117	14	275	1034	1					56	259	446	39			2		691		185	1	9	2	544	1672	1	1			20	56	1	2		49	1		54
Chest discomfort	5	1	80	126	2	1323	5	11	242	66	108	67	20	295	329		1	1		1	213	211	44	39					53		167		14		151	104		1	2			1	12	1		10	1		57
Back pain	30	39	310	289	22	1400	28	24	847	109	176	102	68	493	723	9	1		3	7	90	301	93	79	1		6		77		288	2	10	3	250	151	4	3	5			3	188	1		7	3	3	92
Tremor	946	918	321	1069	7	2025	41	1360	1174	128	182	71	55	546	724	10	1	6	2	8	37	409	568	124	3	1	8	2	822		125	319	7	6	593	503	1	104	2	4	3	6	86	10	5	484	4	6	90
Tinnitus	8	1	59	91		325	10	4	216	40	42	16	8	96	92	1				5	20	169	22	23	1		1		18		134		1	1	85	38		1	1			1	42				1	1	32
Heart rate increased	21	9	81	214	1	954	12	137	271	31	58	36	20	363	306	4			1	2	42	241	143	47			3		175		70	1	3	1	156	146	2	14	1			3	7	1	1	126		2	36
Loss of consciousness	92	29	200	647	4	960	13	345	657	68	223	103	51	277	330	2	5	2	1	4	26	284	503	205			4	1	461		100	3	4	4	1081	549	2	19	5		2	11	5	6	8	304	2	6	202
Heart rate	2	2	2	10		13	1	9	19		5	2	1	6	9						3	211	9				1		7		2				19	20			1					1		3			3
Feeling hot	41	17	505	2212	5	1812	38	475	626	62	129	60	91	354	1592	4	3	10	2	6	60	239	2195	66		1	2	1	2870		215	8	8		650	678	2	134	1		2	3	29	30		445	3	1	82
Injection site warmth	80	20	828	4180	4	5002	87	1015	875	50	150	118	141	614	5916	6	5	1	5	1	67	402	3615	113		2	7	9	5457		370	21	11	3	1849	4141	2	153			2	14	7	51	1	797	5	10	94
Decreased appetite	151	20	54	1084	2	642	12	860	484	50	81	40	26	361	660	3	1	2	1		35	329	551	105	1	1	17		745		35	4	2	2	484	555	2	119	3	4	7	6	5	12	7	571	3	10	56
Influenza like illness	14	8	170	195	4	1226	15	28	413	134	160	101	47	654	872	4	2	1	2	6	111	337	60	55			12	2	90		277	2	11	3	169	107		6	4	1		2	228	2	1	28	1	2	127
Condition aggravated	222	225	126	535	11	943	49	464	963	84	78	32	32	723	583	9		1	3	3	35	488	213	70			12		325		86	44	4	4	224	276	3	25	3	7	4	13	54	4	5	224	3	2	103
Swelling	55	17	441	2082	3	2767	64	567	552	61	138	65	126	521	4061	8	6	1	4	3	130	425	1803	79			11	4	2582		376	3	9	4	984	1670	3	82	1		5	7	33	24	1	435	6	9	90
Inappropriate schedule of product administration	2		5	125		5	1	68	204	115	346	2	1	12	182					1		161	36	9			1		48		4				167	159			1							13			61
Neck pain	38	48	382	418	19	1589	30	26	795	87	126	64	79	482	772	6	3		3	4	76	242	86	84			2	1	114		160	4	7	1	210	166		1	3		1	2	142	2		8	1	2	96
Computerised tomogram	5		18	91		374		70	90	13	24	17	8	103	125					1	11	290	33	18			1		73		24	2		3	109	86		7			3	1	3	1	1	48	1		16
Oropharyngeal pain	10	2	36	311		1303	7	24	189	41	87	52	18	602	254	1	2				40	239	73	40			1	2	88		40	1	3	6	154	182	2		4			1	2	2	1	7	1	2	63
Migraine	6	3	60	98	2	268	8	8	280	44	48	19	23	152	79	2	1		1		38	197	28	26	1		1	1	28		160	1		2	87	54			4				27	2		3		4	40
Insomnia	408	417	174	576	8	953	26	667	714	48	101	44	42	382	762	6	2	5	1	1	75	230	250	48	1		7		415		258	118	7	4	202	243		57	2	11	1	4	72	8	4	226	1	7	49
Rash erythematous	33	14	118	1954	4	1404	11	670	554	58	145	66	29	289	807	7	5	5	1		247	248	641	68			8	1	952		158	3	10	3	908	1819	1	102		2	2	10	4	21	3	489	2	4	68
Vertigo	5	8	70	80	8	460	11	11	405	41	80	40	15	185	93	6			1	3	19	161	36	22	1			1	20		93		6	1	109	43	2	1	3			1	34			7		2	70
Injection site rash	18	6	86	1063	2	1458	12	499	311	21	56	55	24	183	1213	6	1	2	1		61	194	481	36		1	1	1	882		107	2	4	1	708	1419		41			5	16	5	10	4	318	1	4	44
Hypertension	30	47	138	164	4	534	16	38	503	24	64	33	27	219	215	6	2	1		3	49	137	36	33	2		6		48		134	7	2		97	48	1	4		1		1	29	1	1	20	1	1	44
Tachycardia	149	163	134	334	8	525	26	235	536	54	82	32	22	203	251	4			1	4	44	113	147	37	1	1	8	1	149		61	45	3		98	99	1	15		3	1	3	10	4	2	86		1	31
Interchange of vaccine products				5				5	28	9				12	12							96							1						12	5		1								1			5
Muscle spasms	108	84	193	184	3	671	14	227	391	102	120	37	61	228	300			3		3	40	218	142	43	1		3	1	183		188	14	6	3	148	80		4	2	1	3	7	58	3	5	83	3	3	58
Abdominal pain upper	16	6	76	285	1	453	10	72	330	51	242	40	18	247	162				2	4	20	305	174	59	1		1		222		68		2	2	243	230	1	6	3	3	6	5	11	1	1	45	3	4	67
Abdominal pain	153	187	230	632	11	600	39	342	1462	169	491	115	44	302	315	8	4	1	3	23	54	215	317	81	1		13	2	351		180	12	17	2	422	293	4	16	1	71	3	8	23	4	7	167	1	1	112
Blood pressure increased	4		34	61		505	3	7	130	26	30	13	13	123	200			1	1		31	147	22	19			1		15		43		2		56	25	1		2				4			8	1		32
Product storage error			38	1253		272	1	1272	755	12	248	3		22	795							531	241	3					88						1368	3627		1								9			4
Muscular weakness	34	19	223	194	4	1657	22	82	519	110	114	59	64	632	570	1	1		1	2	37	223	142	62			1	1	145		123	1	6	1	291	148	3	11	9		2	5	59			51		5	130
Herpes zoster	22	43	29	551	1	466	6	136	209	14	20	10	24	284	147	1	1	5	1	1	15	186	102	13				1	139		29	6	2	1	153	2078	1	34		1	1	1	11	3		104	2	1	23
Rash pruritic	11	5	80	644	4	768	9	134	268	60	162	65	18	150	174	3	1	1		1	208	165	193	35			1		224		159	2	11		376	815	1	9	1	1	4	7	3	4	1	77	1	3	68
Magnetic resonance imaging	1		1	12		7	1	12	21	3	5	3		21	35							197	2	2					7		1				10	6													1
Anxiety	271	26	92	224	5	403	11	318	486	96	70	37	20	169	132	5		1	1	3	50	176	228	43	1		6		137		153	8	6		133	95	2		2				43	2	13	22	1	2	50
Flushing	14	3	69	290	2	920	6	112	313	38	90	39	14	143	332	3		3	1	2	19	98	163	36			7		193		54	1	10	1	150	183	2	18		1		5	6	6		88	2		50
Mobility decreased	35	8	78	133	2	1559	10	86	168	24	51	21	41	602	1794	1				3	6	263	47	25			4		135		45		2	4	118	60						2	8	2	1	37	2	3	44
Product administered to patient of inappropriate age	43		19	108		329	4	151	202		8		2	31	77					9		104	56	10			1		215		2				343	109										10			22
Gait disturbance	190	178	85	821	11	891	24	390	607	58	84	51	22	388	312	4	3			6	15	218	311	44			1	3	544	1	59	31	3	2	333	383	3	28	6		2	4	39	8	2	169	2	2	88
Heavy menstrual bleeding																						59													2
Oxygen saturation	1			22		23		17	15		1	2	1	8	10						2	173	17	1			2		22		2				22	27		3								22
Vision blurred	8	1	62	118	4	579	10	14	281	49	77	36	30	182	103	3				2	37	133	32	30			4		32		131		2		149	73		1	2				47			5			73
Vaccination site erythema	24		3	59		61	3	57	22	2	4	5	1	26	115						10	58	33	9			3		68		7	2			22	50	1					4			1	8			1
Somnolence	1512	1542	197	1386	9	592	59	2118	1487	89	85	32	31	301	375	13	7	8	1	4	25	239	939	135			16	1	1189		91	450	6	2	363	435	2	151	10	46	7	18	32	18	16	653	4	2	39
Sleep disorder	55	23	56	367	4	429	8	240	263	27	55	15	18	270	336	4	1	4	1	4	45	193	163	28			1	3	298		126	6		1	114	112	1	33	1		4	5	51	7	7	171	1	5	43
No adverse event	4	1	160	6165	5	3192	28	3598	4991	119	133	81	25	163	5095	2			1	1	17	846	602	41			10		834		37				5761	11742		108			1	2		27		191	1	1	68
Musculoskeletal stiffness	41	16	223	481	9	1199	23	392	563	87	125	74	59	394	736	3		3	4	2	60	289	398	102			10	1	472		116	7	8	3	362	295	2	53	7	1	4	4	141	5	4	305	2	2	84
Death	147	132	10	193	2	388	7	452	459	91	14	37	17	443	324	27	2	1	2	2	3	262	218	64			50		179		5	10		3	75	92	1	7	3		2	22	2	10	2	342	1		20
Echocardiogram	2	1	5	15		69	2	22	25	4	25	7	2	30	29						98	134	10	7			3		15		39				15	8	1	1	2				1			15			3
Skin warm	32	4	179	946		2885	21	267	330	29	91	42	44	430	3919	4		2		1	33	264	673	73			4	1	1057		184	5	7	3	751	1722	1	4	1		2	10	1	9	1	206	1	5	63
Swelling face	10	3	56	613	3	882	9	188	263	50	93	43	15	227	192	2			4	2	6	164	239	50			2		337		31	1	5	1	307	424	2	10	1			3	2	2	1	127		3	41
Fall	21	7	82	376		644	6	106	283	26	58	21	18	176	188		2	1			7	184	181	81				1	189		30	3		1	525	389	1	7	4		2	7	16	4	1	58	2	2	69
Lethargy	45	39	105	924	4	616	18	850	538	74	77	32	17	339	475	4	1	7		2	26	261	700	81			9	1	977		62	17	5	2	397	559		149		6	4	7	17	20	5	655	1	8	31
Feeling cold	13	5	48	80	1	590	4	51	119	28	43	23	14	227	283	1				2	9	168	71	24			7		55		29	5	2	1	96	46	1	3				2	10	1		28		2	30
SARS-CoV-2 test negative			2	32		1	1	21	21	3	1	2		19	51					1		103	4	2			1		14		2				20	21										1			2
Chest X-ray	8	2	14	126	1	298	1	134	84	7	23	14	2	97	168					1	38	152	51	11			1		93		27	1	1	3	104	110	1	7	2		2	1	3	1	1	89			15
Laboratory test	29	10	36	292	4	602	8	249	235	21	60	24	11	173	301	1	1	1	2	4	45	195	157	40			8		172		72	7	2	2	211	217	2	11	2		2	13	2	3	2	136	2	1	40
Expired product administered	3	1	132	1039	1	373	3	393	415	43	56	17	12	34	775	1				7	4	133	233	11					432		11				814	642			1			1				17	1		25
Body temperature increased	167	41	88	1152	3	1235	15	1316	597	57	87	46	17	454	1310	12	2	1	2	1	36	273	964	110		1	11	2	1116		39	21	4	1	631	895		61	6		7	12		16	4	1205	2	6	72
Burning sensation	6	2	44	101	2	620	5	10	144	26	41	24	17	202	269	2				1	18	135	22	10			1	1	35		83		2		93	127	1		2				13			6		2	62
Pulmonary embolism		3	2	1		20		2	20	4	7		1	19	13						3	191	4	1					5		13				8	1		1						1		2			8
Paraesthesia oral	1	2	20	56		410	5	1	96	32	38	13	3	93	69	1	1			2	3	71	7	4					8		12		4		42	36			1				2			4			20
Vaccination site swelling	12	1	11	87		164	5	95	43	1	15	10	4	56	331						20	70	57	14			1		110		34				65	126	1				2	12				26			4
Axillary pain	2	1	14	26		235	1	1	28	3	17	13	2	88	381						45	64	10	9					22		28				27	20										1			8
Throat tightness	5		72	135	2	1096	5	3	184	46	66	62	12	184	138					1	15	77	54	28			1		43		28		15	1	130	97		1					1			9			59
Full blood count	7	5	37	458	1	527	6	390	219	32	61	32	9	80	415	3		1		2	53	113	168	26		1	1		298		74	2	3	3	353	423	1	27		1	1	2	2	2	1	264	1	1	22
Myocarditis	15	13	13	27		30		32	53	5	34	3		40	19	1			1		224	64	21	13			3		26		64	1	1		22	17	3	2								11			11
Seizure	98	17	15	429	1	129	8	424	277	33	34	17	11	140	205		4	1	6	2	3	243	195	119			16		295		8	8		1	338	238	6	1	2		4	17		6	5	44	1	1	38
Anaphylactic reaction	23	14	23	319	1	349	9	127	206	52	63	39	38	257	160	1			2		7	104	134	36			5		178	1	15	3	2	2	133	176	1	10	1			16	1	2		58	2		44
C-reactive protein	17	1	3	74		66		81	76	2	17	6	1	33	102	1				1	20	234	26	11			10		31		12	1			48	51		1	4		1	5				37			5
Confusional state	63	68	76	211	5	421	10	58	289	61	72	50	18	210	196	2	1	1		7	20	143	47	33			2		78		42	7	3		144	88		1	2			1	37	2		15		1	35
Limb discomfort	6	1	18	43		247	2	15	40	19	18	5	5	86	257					1	4	81	12	5				1	14		11		1		35	39					1	1	1			3		1	17
Investigation	1			6		1		4	8		1			5	2							161	3	2			4		5						1
Pallor	1419	1408	416	1610	4	1077	61	2413	2012	62	193	87	78	295	376	6	2	6		3	17	205	1619	237			20	2	1604		54	354	6	5	1286	982	5	163		19	12	36	5	25	15	1142	4	5	134
Ultrasound scan	8	2	9	49		135	1	96	67	7	9	4	8	49	126		1				6	105	39	9					54		8			1	37	42	1	1		1	2	6		1		36			13
Hypersensitivity	268	305	338	1120	15	1249	40	608	1067	110	135	77	87	496	1057	14	4	6	3	4	69	221	694	61			13	2	889		153	71	10	5	394	580	3	70	6	3	5	10	23	15	3	293	6	3	109
Abdominal discomfort	8	2	21	67	2	320	7	30	107	15	93	26	11	137	153					6	10	141	47	24			1	1	56		29		1	1	69	60		4	2	2			1	2	1	17		2	40
Impaired work ability	4	2	20	37	2	155	7	3	116	23	35	14	16	115	146					3	17	65	13	8					13		35				42	16			2			1	5	1		1	1	2	38
Rhinorrhoea	37	16	33	758	4	820	7	401	260	17	34	23	13	448	212	4	7	2	1		35	166	246	33		1	6		369		50	5	4		273	562	2	57			3	11	7	13	2	295		4	35
Throat irritation	8	2	18	92	1	677	2	8	78	23	42	27	5	140	79					1	5	84	40	9					34		17		1		84	118			1				1	1		3	2		23
Off label use				9		23		10	11	1	1			28	12							98	5	2			1		10						41	6										5			6
Thrombosis	2	1	5	8	1	45		8	22			1	1	16	33		1				5	92	8	3					9		14	1			12	6							2			6		1	8
Illness				12		5		1	8	3	1	1	2	548	11							93		3			1		4						3	2													1
Presyncope	1		34	86		182	6	34	90	8	64	19	9	72	62		2				7	72	45	26			1		31		27				171	94	3					2				29			50
Lip swelling	4	1	13	218		692	2	45	99	33	58	30	5	135	106	1				1	7	104	86	29		1			116		15		7		174	246								1		33	1		34
Facial paralysis	1		7	35		53		12	34	7	7	7	4	58	21					2		69	14	7			1		9		1				25	27						1				1	1		12
Lymph node pain	10	5	25	70	1	139	2	11	43	13	36	16	8	64	113		1			1	54	62	20	6					53		27		2		31	30	3						1			2	1	3	7
Dysphagia	115	122	93	247	3	734	19	149	363	80	66	39	28	196	125	6			2		16	98	83	26			1		100		42	17	13	1	115	116		8		2		3	12	3		29	1		49
Hypotension	77	128	227	343	3	400	29	105	468	34	83	39	18	158	238	1				2	9	95	95	34			8		121		18	22	4	1	172	106	1	10	1	1	1	3	9			44	1		54
Cold sweat	4	2	52	149		384	1	80	203	24	57	29	7	118	134			1			10	64	127	30			3		129		40	1	3	1	233	144	3	10				1	3	1		76	1	1	44
Extra dose administered	5	2	13	299		262	2	277	279	9	16	4	5	62	274	1					1	99	181	10					141		1			1	309	722	1	2								14	2		10
Hypoaesthesia oral	4	1	14	34		327			46	18	12	10	3	67	47				1		5	43	10	4					10		11		1	1	31	15			1				2	1		1			22
Visual impairment	9	1	13	64	1	223	4	10	156	38	48	23	9	108	78					4	6	99	26	16					19		34			1	89	38	1		2			4	9			4	1		52
Discomfort	8	4	71	280	3	460	6	125	168	18	52	29	16	172	416	1			2	1	42	109	149	19			2	2	210		60	1	1		149	184	2	9	1		4	4	15	2	1	57	1	3	35
Platelet count	2	1		29		20		25	17		2	3		13	19							212	13	3			2		15			1			18	21		1				1				11			6
Deep vein thrombosis			1	3		29			14	2	2		1	9	18					1	2	102	1	1					3		18				6	7							4			1			1
Fibrin D dimer	2	1		3		17		7	6	3	3	1		11	13						7	109	8				1				3				4	2	1					1				3
Swollen tongue	2		7	64		505	3	31	66	14	33	19	4	88	62	2				1	2	70	30	8		1	1		35		8		2		44	72		2			1	3				21	1		25
Immediate post-injection reaction	23	4	57	676	1	1461	11	235	319	57	95	45	26	321	455	1	1			2	7	129	204	59			2		247		62	1	1	2	588	563		4	1		1	9	6	3	1	140	1	2	104
Dysgeusia	1		32	37	1	368	2	2	200	20	27	9	3	77	62					1	4	61	9	8			1		38		21		3		92	7							7						21
Loss of personal independence in daily activities	5	1	18	56		104	1	9	49	12	18	12	4	108	146					1	6	162	11	23			1		24		10				44	19	2				1	2				3	1		12
Cerebrovascular accident	10	6	11	23		129	2	17	51	2	7	4	3	77	49						3	80	15	6			1		19		11	3			19	5		4	1				3			17			10
Menstruation irregular			3	4		8	1		10		2				1		1				2	43	1	1					1		10				14	5							3						1
Injection site induration	57	12	602	2636	2	1685	56	1004	570	31	85	46	102	217	1824	3	2	8			89	190	2380	61		1	3	2	3766		258	8	8		1166	2362	4	191			2	10	1	40	2	914	4	7	55
Hot flush	1	1	28	38		209	1	4	89	23	31	10	6	65	80				1		9	77	11	4			1		12		38				39	20							8			5	1		19
Balance disorder	22	10	40	196	1	364	7	77	245	25	35	21	16	145	112	5			1	2	18	99	53	17			1		93		64	3	4		111	117	1	9	3		1	2	43	2		39	1	1	40
Injection site reaction	724	448	678	1668	2	1930	97	1035	692	79	126	64	125	420	2364	11	3	3	3	4	239	140	1326	56			7	1	2194		247	62	8	3	650	1325	3	108	3	2	7	17	9	21	3	455	2	2	53
Metabolic function test	1	2	12	143		232	2	144	99	18	30	14	3	41	159					1	35	62	37	9			2		82		45	1	1		143	118		5			1	2	1		1	66	1		11
Contusion	27	9	85	467		951	3	157	171	11	29	17	15	128	434	2	1	2	1	1	10	150	265	25			4		368		44	4	3	1	205	244		37	1			1	4	6	1	129		1	39
Vaccination site pruritus				9		8		20	2		2	2		3	8		1					33		2			1		4		1				4	5					3	7				1
X-ray	10	1	21	54		416	2	116	88	7	11	5	12	145	177	1					6	127	41	8		1	1		63		24			1	47	51	1	1		2		4	4	4		43		1	14
Bell's palsy			1	3				1	3		1			8	3							39	3						3		1				1	3
Pharyngeal swelling			1	7		29			9	3	2	2		13	9					1		65		1					4		1				8	8													1
Tenderness	22	2	325	935	2	1336	21	177	268	29	98	44	54	251	1894	4	3	1	3	2	141	148	798	35		1	9	2	1093		246	2	2		448	793	3	41	1			1	11	10	1	171	2	1	33
Dysmenorrhoea			2	4		2			7	1	2	1		2								26		2					1		5				6	6
Ear pain	21	27	58	200	3	297	5	47	164	12	29	17	10	128	89	1	1			1	14	66	41	9					62		32	1	1		49	83		1			1	1	10	1		25			23
Pericarditis	4	4	10	14	1	43	2	6	48	7	39	10	2	50	12						201	55	7	12					3		63		1		21	7	1		2				4			1			5
Electrocardiogram normal	6	2	17	79		288	5	97	148	27	86	26	5	105	138	1			1	1	191	62	72	32			1		80		115		2		109	68	2	4	6		2	4	4	3		97			51
Computerised tomogram head	6	2	5	56		179	2	62	39	10	8	9	4	58	46						5	104	22	11			1		36		9			2	55	52		2				1				30			15
Unevaluable event	155	170	129	718	36	863	39	522	1180	42	66	21	30	160	408	10	3	7	6	1	52	957	450	17		1	7	1	582		105	56	4	1	449	755	1	85		5		2	36	10	2	301		3	46
Inflammation	34	7	32	176	2	541	6	119	148	16	32	13	18	189	731	1			2		21	114	128	23			5		199		36	1			128	144		3				6	15	1		98			39
Nasal congestion	13	8	32	266		558	10	189	179	17	28	28	10	231	133	2	2	1			37	108	168	15			3	1	223		54	4	2	2	120	234	1	48				1	3	5	1	188			11
Eye pain	11	14	58	157	6	365	3	15	204	20	34	19	10	139	67	3	3		1		23	60	25	13	1		1		42		46	2	2		40	66	1		1	1		1	18	1		4		1	24
Rash macular	42	13	73	1009	4	690	7	502	352	24	58	41	18	116	579	4		3	1	1	114	84	496	36			6	2	689		64	2	5		426	797	2	92	1	3			2	12	2	415	3	1	36
Vaccination site warmth	6		5	47		116	3	34	22	3	9	2	1	33	170						11	33	29	11					58		15	1			33	78										8			1
Troponin				3		21			7	2	14	3		12	18					1	38	90	1	1					1		20				3	2										1			3
Nasopharyngitis	19	6	11	223		261	4	152	110	23	36	12	4	276	161	1	1	1	1		12	140	81	37			6	2	148		24		3	1	94	147		4	3		1	10	3	5	1	94		3	44
Urine analysis	14	5	12	177		217	3	208	108	11	15	8	1	71	108	1					9	100	84	15			5		135		18	2	1	2	124	158		7	1		2	9		2	1	111			12
Joint swelling	7	8	40	312	10	358	6	41	196	31	62	30	17	119	274		1			1	25	99	77	13			8		108		72	1	4		121	91	2	5	3		1	2	196			48	1		53
White blood cell count	6	3	4	46		46	1	68	36	3	11	7	2	22	85						8	209	34	9			6		34		10		1		37	32	1	5				2				48			5
Unresponsive to stimuli	54	13	24	412	1	294	3	557	301	9	51	19	8	88	127	2				2	4	92	378	69			5	1	395		15	22		1	388	289		25	1	1	4	16	1	7	5	357		1	40
Ultrasound Doppler			1	6		55		8	5		2	2		10	53							84	3	2					4						3	1										2			4
Menstrual disorder	1			4		1	1		17		4	1	3	7	1					1	2	47	2				1				6				5	2												1	6
Blood test normal	9	11	26	165	1	290	3	160	145	32	49	27	8	153	130	2	2		2	2	7	86	71	39			6		128		25				123	112	3	4			1	13	1	1	2	110			48
Ageusia	1	1	3	4		57			29	6	4		2	35	9						2	35	2	1					1		6				8	1							2						4
Magnetic resonance imaging head			1	2			1		5		1			5	2							77	2						1		1				1	1	1
Atrial fibrillation			14	2		97	1	1	21	4	8	3	4	51	60						12	90	2	1							9				6	1	1						2			1			2
Incorrect dose administered	1	1	18	177	1	512	1	149	407	12	23	21	5	50	126							37	105	6		1	3		97		9			1	630	329		7				2	1	1		77			17
Arrhythmia	19	20	27	33	2	87	4	22	84	7	12	2	5	46	48		1		1	1	17	36	14	2	1		2		19		25	3			23	11							6	2		7			26
Vaccination complication	57	9	44	361	4	477	6	229	176	31	53	28	15	239	496	4	1	1		1	216	134	145	32			6		203		51	4	1	2	191	300		10			1	10	3	5	2	94	1	2	33
Head discomfort			8	16		46	2	3	18	13	5	3		32	23					1	1	40	8	4					12		2				12	11							2			1	1		9
SARS-CoV-2 test positive				1						1				5	2							28		1
Blood glucose	3	1	2	31	1	55	1	21	21		5	2	2	13	18						1	98	12	8			5		14		3		1		37	27		1								15			4
Disturbance in attention	19	7	33	153	1	103	7	51	211	28	49	17	11	59	40	3		1		1	31	78	67	21			2		70		123	1	2		61	37		4	2			1	63			31	1	2	39
Eye swelling	5	5	38	359		711	9	130	149	25	48	26	10	177	73	2	1			1	12	82	185	31					236		17	2	3	1	198	303	2	13				3	2	4	1	96	2	2	32
Neuralgia	1	2	32	28	2	266	8	2	117	20	17	9	11	93	89					1	6	64	11	2					9		30		1		34	28			2				14				1	1	31
Wheezing	31	15	43	550	4	960	15	217	264	19	49	70	10	362	276	3	1	1	1	1	17	214	353	42			6	2	428		37	5	6	3	283	480	1	36		1	1	4	3	5	3	217	1	3	27
Pneumonia	205	197	24	329	6	486	11	514	317	16	22	16	13	430	1225	16	1	1	4	2	21	269	230	31	1		20		255	1	33	55	2		78	219	3	38	2	4	4	5	5	4	2	349			37
Exposure during pregnancy	4		26	291		265	6	1	92	15	31	20	9	290	35						21	233	28	11					63		40			7	56	429	1					3					2		11
Rash papular	33	18	38	1259	5	329	9	450	272	15	86	24	11	68	95	7	3	11			295	92	367	16		1	3	2	490		119	5	7		465	1826		109		1			3	9	1	472		1	28
Night sweats	2	1	25	44	1	148	3	4	68	20	48	27	8	67	136	1				5	38	45	17	12		1	2		15		77		1		31	20	2	1	2				29	1		4		1	24
Epistaxis	29	34	19	157	3	116	3	56	112	6	14	10	5	52	33	2	1		1		9	63	50	12	1		3	1	65	2	26	2	3	2	63	59	1	5	1	1		1	2	1		19	1	1	19
Angiogram			2	6		36		10	9	1	5	2		12	25						6	95	2	2					3		6				14	6										4			5
Haemoglobin	1		1	15		15		13	16	1	3	2		8	14						3	151	12	4			3		11		3	1			11	11										8			4
Vaccination site rash	1		2	37		40		25	5		3	3		9	31						9	24	7	2					11		7				23	43	1				4	9				4			1
Dysstasia	12	5	14	95	2	233	1	44	54	10	15	9	7	96	93		2			1	3	68	33	16					47		10		1		72	47	1	1	1		1	3	1			15		1	15
Bone pain	6	4	31	40	1	222	3	3	99	7	27	17	8	66	91		1			1	18	63	12	6					9		56		1		27	13			1			1	13			2	1	1	20
Vaccination site reaction	58	2	2	33		41	1	81	24	2	8	3	2	25	71					1	14	24	45	6			3		27		7				16	32					2	7			6	1			6
Menstruation delayed				3		1	1				1			1								7	1												5	4													1
Influenza	68	79	164	229	19	978	18	102	973	40	51	25	31	1643	252	8	4		2	2	18	121	40	14			2		60		70	14	4	2	74	92		5	3	3			65		2	31	1		22
Blood pressure decreased	6	4	22	69		187	3	20	86	19	38	10	11	48	90		1				5	41	39	15			1		26		11		2		132	53	3					1	2			11			31
Disorientation	3	1	31	85		217	4	11	105	22	37	24	7	103	97						10	51	35	18			2		58		27	1	1		105	61	1	3	4			3	15			9	1		25
Dehydration	116	143	40	333	3	288	10	413	334	22	54	28	18	128	197	5	3	3	1	2	33	100	205	35	2		1	1	289		44	41	7	1	106	177		44		46	2	2	10	4	3	264	1	2	25
Physical examination				2		9	1	5	3		1	2	1	4	9							68	4	1			1		5						4	7		1						1		5
Ear discomfort	2		1	38		78	1	9	23	11	5	6	2	21	21	1				1	1	34	7	5					14		4	1	1		19	23				1	1	1	3			3			4
Hypersomnia	14	4	7	102		165		146	90	8	13	8	7	80	116	1	1		1		3	88	75	20			2		106		12	1		1	77	68	1	4			1		2	1	4	90		1	10
Muscle twitching	494	567	143	551		268	26	665	501	55	38	19	25	81	88	4	1	4	2		10	48	195	25	1		2		349		62	163	2		160	165	1	29	1	5	1	11	29	2	2	169	1	3	26
Blister	30	26	74	1001	3	459	10	270	251	24	67	25	18	146	238	4		5		1	186	98	368	34		1	6	1	501		98	7	3	1	383	1946		51				10	3	15	1	248		3	54
Chest X-ray normal	13	4	16	153		286	4	207	125	23	56	18	6	128	202	4				3	95	58	68	20			5		185		60	2			132	128	1	11	4			3	8	9	1	140			32
Dry mouth	4	1	25	34		181	3	5	110	20	20	6	5	49	50	3				1	10	46	11	7			1		3		30				17	13	1					1	6			3		1	9
Injection site mass	824	1146	1354	1660	3	1349	150	1326	981	52	102	40	191	260	948	13	1	8	1	5	18	90	940	46	2		5	2	2018		384	367	4		354	872	2	271		7	2	9	23	16	2	521		7	22
Myocardial infarction	1	2	6	9		95	1	1	25	2	5	5	2	69	41						38	47	1	5					1		24	1			12	3							2			4			6
Computerised tomogram thorax			1	2		22	1	2	3	1	2	1		10	13					1		46		1							4				3	2	2									1			1
Full blood count normal	10	5	21	329	1	379	10	288	196	20	77	40	9	106	157	2		1		1	77	55	129	27			4		181		81	1	2		281	318		12	1				10	2		177	1	1	34
Anosmia	1					20			3	2	1			12	6							17	1								1				1								1						1
Oedema peripheral	432	556	898	1793	49	2966	101	740	1370	127	204	64	149	573	3936	12	9	1	4	3	80	247	1227	82	1		6	1	1989		316	121	20	3	790	1381		63	4	3	3	4	97	15	3	401	5	5	121
Breast pain	1		12	9	1	76	1		23	2	3	2	3	37	89						2	24	3						2						8	5							2			1			3
C-reactive protein increased	80	12	28	205	2	206	6	360	218	23	63	20	10	231	675	2	3		3	5	55	98	215	79			24		181		50	2	2		115	89	3	8	10		2	30	4	4	3	273	1		89
Photophobia	16	11	41	171	5	125	3	27	153	40	33	39	4	70	52	11	2		1	2	49	40	35	35			1		33		78	3	1		67	56	1	3	3			3	14		1	12			22
Gait inability	9	2	2	73		45		31	32	4	4	3	1	58	51		1			1		90	18	4			1		33		3				40	27						1				1	1		6
Vaginal haemorrhage		2	4	23	1	28	1	2	22	4	8	3		23	3						2	34	5						4		12		2		37	17							1			1			17
Oxygen saturation decreased	10	1	2	69		77	1	82	46	3	4	4	1	50	76		1		1			81	50	12			1		81			1			30	58		8				3			1	74			5
Skin discolouration	233	258	134	419	5	445	17	486	404	24	44	22	15	111	304	2					17	87	315	36			7	1	451		67	53	2		187	228		48	2	3	6	7	6	5	2	226		1	31
Maternal exposure during pregnancy	1		4	64	1	88			20		8	2	1	58	4						4	8	3	2					8		7				13	35													9
Pain in jaw	2	1	47	59		135	3		38	9	15	6	13	35	41						11	38	7	2					14		19		3		33	10							8			1	2		16
Haemorrhage	81	92	28	105	4	160	6	138	168	7	9	4	5	59	45	2					3	58	27	10			5	1	43		9	21	1	1	39	44	1	2			4	6	1	1		28			14
Asthma	166	205	71	426	5	500	29	225	411	26	23	12	13	255	205	14	2	1	1	1	7	213	93	26	2	1	7	1	181		46	33	3	2	63	184		6	7	4	5	16	10	1	6	70	2	1	36
Nervousness	103	106	36	122	2	148	2	105	187	18	21	8	2	50	52	3	1	2			8	30	41	14			1	1	41		40	29			70	48		5		1		1	7			19			9
Immunisation	1		1	5		11		10	18	4	2	1		17	7							28	1						4						12	8
Blood creatinine	2			8		14	1	9	17		2	3		7	16					1	1	120	14	3			3		9						3	4			1							7
Speech disorder	135	129	48	725	4	264	12	295	403	28	38	27	14	131	82	6	1	6		2	9	55	163	30			7		293		27	41	6	1	112	175		26		2	1	3	15	4	6	104	1	3	32
Peripheral coldness	16	6	17	47		163	3	78	68	9	14	6	3	48	56			1		2	1	48	66	22					51		10	1	2	1	39	31		4			1	2	3	1		70	1		11
Sensitive skin	4			2				3	6	1				4	8							18	2						1		1				1	1
Underdose	2		7	59		309	1	27	246	12	20	2	2	11	29							34	8	2			1		24						322	36										6	1		4
Troponin increased		1	4	5		12		2	7		29	3	1	12	8						123	55	1	2					2		49		1		12	6										2			2
Taste disorder			1	1		3			5	2				4	8							21													1
Intermenstrual bleeding																						14					1
Dysphonia	30	31	42	131	2	697	4	87	168	15	28	18	9	308	111	1		2	2		8	62	83	16					95		25	8	1	2	65	77	1	9	1	1	1	1	3	2	5	60	1	1	21
Angina pectoris	1	1	4	7		34	1	2	15	5	7	1		17	13						20	36	2	3			1		6		11				5	5	1						1						7
Muscle tightness	19		21	38		156	5	31	52	17	11	8	5	41	73						7	37	23	5			1		22		15			2	36	32			1				2	1	1	7			5
Aphasia	36	34	14	491	2	140	6	187	109	12	14	12	5	56	57	4	1		1	1	3	64	63	15			2		157		10	12			96	128		14	1	1		2	5			53	1	1	18
Oropharyngeal discomfort			1	2		11	1		2	2	1			1	4							34	1						1		1			1	2	2													2
Movement disorder	66	57	37	107	4	147	7	109	137	9	13	5	17	51	110	2			1	1	2	41	68	18			2		73		10	13		1	35	37		7			1	1	5	3		46			15
SARS-CoV-2 antibody test															3							39
Dysarthria	8	3	22	55		184	4	14	97	23	21	11	14	85	43	3				2	9	40	31	12			2		25		17		1		40	32		1	2				5			3	1		22
Electrocardiogram abnormal	5	4	18	24	1	96		26	80	12	65	10	8	71	54				2		254	32	19	16			4		26		103				35	17	2	1	3			2	3			20			25
Weight decreased	42	41	48	155	4	187	8	112	344	27	45	24	20	135	83	4		1		2	21	85	73	21			5	1	92		90	11	1		92	67		13	1	16		3	32	2		72			49
Thrombocytopenia	44	49	26	420	8	95	9	157	290	9	31	29	6	85	97	7	1	2	1	1	4	106	95	26			8	1	119		9	10		1	69	146		21	1	1	1		2	2	1	93			24
Drug ineffective	270	355	28	1961	81	154	19	778	2967	56	41	9	8	83	332	66	11	13	15	1	3	230	233	20			7	2	385		2	90		1	151	7033		81		3	4		24	17	2	432		8	24
Abdominal distension	14	18	7	40	2	81	1	96	115	6	43	12	4	48	61	1					9	51	50	11			5		66		22	6			29	19		3		11	3	5	1	1	1	51	1	1	8
Respiratory tract congestion	3	1	9	105		393		80	66	7	17	14	9	152	131						8	59	49	5					70		14		1	2	74	98								2		36		1	16
Abortion spontaneous			13	81	3	85	2		47	12	22	13	7	72	5	1	2				4	34	18	3					3		18		2		59	62											1		15
Induration	10	2	78	370		614	3	111	104	4	42	24	25	130	897						21	97	250	18				1	445		74	1		1	327	810	1	6				2		3	1	98		2	25
Product dose omission issue								1		18	17			1								14	1						1							4
Angioedema	9	6	8	66		141	4	42	55	23	16	12	6	85	65						1	73	67	20			2		64		8	1	1		60	62	4	2						1		14	1		21
Memory impairment	7	1	31	49		89	2	5	181	24	50	16	14	57	28	1		1	1	1	25	54	30	15		1	1		22		105			1	60	21	1						46			1	1	1	18
Neurological examination	1	1	4	25		62	3	18	32	10	8	6	5	16	7					1		36	17	8			1		17		4				25	18		1	1			1		2		21			12
Blood thyroid stimulating hormone	1		2	20		49		2	20	8	8	2	1	22	17						14	50	10	3			1		6		22				24	13		1								5	1		5
Dyspepsia	25	28	47	67	1	151	5	27	242	14	56	18	10	73	50	1	1			1	18	44	22	15			4	1	30		55	2	5	1	35	18		2				1	6		1	15			15
Heart rate irregular	1		8	19	2	82		11	30	1	7	3	4	29	28						16	24	20	5			1	1	18		18				18	12		2					9			15	1	1	8
Product preparation issue				20	1	2		83	42	10		3		1	20					5		28	2						10						13	17										15			1
Head injury	3		17	75		190	1	13	77	3	19	8	1	38	39					1	1	40	51	28					41		13				220	140		1				2	2		1	11	1		17
Poor quality product administered				2		1			1	2	1			5	2							3	4						1						2	2
Joint range of motion decreased	8	2	134	80	1	790	9	13	91	15	33	7	37	220	548		1	1	1	3	19	63	40	4			2		64		55	1		1	48	34	2	5		1		2	24			15	1	2	25
Cellulitis	251	283	735	1600	4	1680	89	499	400	19	124	25	86	342	4150	6	2	1	3	3	259	129	1353	40	2	1	8	3	2205		164	43	3		509	1156	3	102			1	6	7	22		331	1	1	35
Injection site bruising	9		17	104		534	2	72	45	9	14	8		67	237						2	66	57	4					118		21				78	122		3				1		1		15			12
Pain of skin	3		6	20		91		2	12	4	6	3	3	36	62						4	38	4	2			2		9		10				22	28	1							1		1			9
Arthritis	35	33	69	252	66	206	11	51	546	22	33	19	20	122	107	6	1		1	2	21	62	41	13		1	3		42		104	1	3		71	31	3	8	3			2	303	1		20	2	1	29
Blood glucose increased	13	7	18	87		165	2	95	90	6	23	12	3	64	120		1		1	3	11	54	66	16	1		6	1	71		30	4			49	59		7	1		1	1	2		1	74		1	21
Deafness	31	37	13	102	6	102	3	46	99	10	9	2	4	48	30	2	1		2		1	35	17	7	1			1	27		16	12			26	26		3		1		2	8			26		1	9
Neuropathy peripheral	7	3	19	20		156	2	1	77	16	10	4	6	91	45	1					5	27	11	5			1		12		19				16	7		1	1				32			2			24
Vital signs measurement				1				1	4		1				1					2		28	1						1		1				3	1													1
Computerised tomogram normal	11	1	11	145	1	353	3	139	138	22	31	25	9	105	112					1	12	35	88	14			4		111		31		1		152	130		6	3		1	4	12	1		146			34
Platelet count decreased	34	16	19	415	1	158	3	293	235	12	30	40	9	116	152	2	9	1	2	3	12	75	145	44			17		112		14	1	1		148	208		14	2			25		2		194	2	1	23
Urinary tract infection	57	45	12	91	1	132	5	141	143	10	35	16	4	72	84	2				3	4	92	84	11			6		78		13	15	2	2	41	49		14		7		4	6		2	75	1	1	14
Product use issue				8		2		2	3	1	1	1		20	15					2		44		1			1		2						4	6										1
Feeling of body temperature change			2	10		110			19	7	11	5	3	48	54						1	29	7	3					9		7				7	2												1	13
Laboratory test normal	38	14	25	221		393	4	215	218	38	77	44	12	146	163	2		1	1	1	46	45	120	32			9		182		67	1	2		174	153	2	9	3			6	5	1	1	165	2	5	53
Respiratory distress	13	12	6	100	2	123	6	85	71	19	18	8	4	47	66	1	2		1	1	3	54	80	14			4		112		9	1	1		44	69		17	1		1	1	1	1	1	81		1	22
Suspected COVID-19				1									1	1								25
Fibrin D dimer increased	2			3		14	1	4	10	3	2	1		10	17						5	31	3	4					3		2				1	3						1				3			7
Sneezing	2	3	11	167	1	267	3	36	57	5	15	10	3	137	53			1			6	46	101	7			4		108		12	2	1	1	66	109		3				2		1		29			3
Disease recurrence				1		2			1			1		1								22														1
White blood cell count increased	51	17	41	233	3	480	10	497	269	32	58	31	18	268	1258	3	3		4	4	33	133	262	65			20		292		43	9	1	3	171	158	5	35	6	1	4	18	7	7	1	412	2	1	62
Hypoacusis	6	3	7	50		54	3	20	57	8	15	7	7	27	19					2	7	24	16	9			2		24		18	3			32	16							13	1		7			6
Amnesia	9	10	37	63	3	108	6	4	183	20	42	19	10	58	35	4		1	2	3	34	61	21	17	1		1	1	17		230		2		62	16	1						120	2				2	19
Thirst	13	11	19	149		101	3	29	78	7	12	10	3	42	37	2			1	1	5	32	23	10			1	1	33		25	2	3		36	38		3				1	1			12		1	8
Ocular hyperaemia	9	4	17	222		1038	2	72	104	7	25	19	2	214	63	3		1		1	18	54	105	7			2		105		15		3	1	91	137	1	6					4	4		63		1	16
Cardiac arrest	140	157	14	56		84	1	250	154	11	9	2	3	56	40	2		1	1		6	52	90	4	2		3		108		5	44	3		19	24	1	30	1	4	1		2			94			10
Retching	1	2	13	59		144	1	70	49	6	14	3	2	45	66						6	45	52	4				1	74		8		1	1	44	50		8				1	2	1		57		2	12
Skin burning sensation			44	39	1	167	2	8	85	17	19	10	8	44	76		2				15	39	21	7			5		19		63	1	2		34	26							23			4			16
Vaccine positive rechallenge	20	5	16	46	1	178	8	144	190	44	25	10	4	141	40	2					12	30	120	14			9		144		97	1	5		63	44	1	14			1	2	6	2	6	168		1	45
Injected limb mobility decreased	25		109	80	1	1917	7	40	150	22	48	6	27	489	2094	1				1	10	112	65	12			1		131		61			1	144	90	2					1			1	20	2	1	50
Dyspnoea exertional			1	8		31			8	2	10		1	35	20						23	23		3					1		16					1	2						2						5
Guillain-Barre syndrome	22	29	94	132	7	1382	16	47	218	34	77	50	32	760	196	6	1		3	4	8	69	81	35			1	1	52	5	22	1	4	1	130	53	2	1	2		1	3	2			14	1		84
Blood glucose normal	13	6	8	104		186	1	93	139	15	36	19	3	68	90	2	1		2		24	39	80	26			11		73		32	1		3	147	91			1							63	2		29
Blood creatine phosphokinase	2	1	8	10		39	1	5	14	3	5	3		11	33						7	52	6	1					7		3				8	11			1							3			3
Facial pain		1	5	32		68	1	2	27	12	9	6	4	41	25					1		29	4	4					8		5		1		12	14			1				1			1			6
Incorrect route of product administration	5		7	245		6	1	33	18	7	5	13	1	28	20							70	18				3		22						12	134									1	3			2
Postmenopausal haemorrhage														1								8																											1
Vaccination site mass				10		5		12	5			1		3	13		1					9	1	1			3		7						2	6						2
Anticoagulant therapy						7				1	1	1		8	4							25
Transient ischaemic attack	2	3	1	3		32	1	1	5	3	5		2	20	10						2	27	1				1		2						7	1							1			2			3
Joint stiffness	5		52	162	4	153	2	11	118	14	33	8	12	61	84					1	23	31	20	12				1	26		96		1		32	29							140			3	1		20
Eye pruritus	1		1	58		462	1	9	29	6	15	11		117	33	1					5	33	23	6			1		19		8		2		24	44	1						1			3			6
Sensory disturbance	10	7	28	73		168	2	34	204	17	18	9	6	78	42	1		3		1	1	47	36	16			2		49		15	4	3		46	36	1	5	3			1	14	1		18	1		43
Cardiac flutter				2		15		1	1	2	2			2	5						2	16	1						1		3				2	3			1				2			1			1
Blood potassium				4		4		4	7					5	5							105					1		3		2				1	1										3			1
Panic attack	4		1	11		38	1	2	18	8	8	3	1	17	11						2	15	2	3					1		6				15	6					1		1			1		1	6
Hemiparesis	12	9	18	68		91	1	42	111	7	8	6	6	57	21	1	1			2	3	32	30	8				1	41		4	2	1		41	27		9	1		1		4	1	1	42			18
Oral herpes	2		3	28		83	1	5	14	2	3	3	1	32	22						2	48	5	7		1			5		2			1	11	34			1			1				2			5
Cerebral infarction	10	10		11		10	2	21	16	2	1	2		17	23							12	11						13		2	3	1		8	9		5				1	1			20			2
Alanine aminotransferase	2	1		4		5		7	12	1	4	2		2	5							105	6	1			3		2			1			5	1					2	1			2	7			6
Diplopia	2	3	25	24	1	150	5		179	26	31	17	5	86	41	4				4	5	27	22	9					9		19		2		47	17	1		4				5			1	2		40
Nodule	7	1	14	56		204	1	65	41	6	11	5	8	51	165						10	38	30	5					47		44				90	89	1	2			3	7	4		1	24			4
Depression	20	15	36	51	6	106	5	11	240	19	37	19	10	87	39		1	1	1	2	37	67	24	15	2		5		25		171	3	2	1	56	21			5			1	79	1		3		4	30
Heart rate decreased	5	2	12	46		77	1	32	57	6	19	5	5	23	23						3	28	24	7					30		10				68	38						1	1			22			16
Acute kidney injury		2		1		20		4	3	3	3	6	1	29	28					1	3	43	2	1											4	5	1		1							1			2
Musculoskeletal chest pain			7	10		66			13	8	11	2	3	25	50					1	5	30	1	2					6		9				8	10							3			1	1		2
Parosmia			2	8		18		1	11	3	4	1	2	18	7						1	35		1					1		3		1		5	3							2						2
Lumbar puncture	4	3	15	77		390	2	114	121	18	21	25	5	80	54				1		25	59	61	11			1		79		21	1	1		92	57		7			1	1	2	2		102	1		14
Bradycardia	57	62	53	109	1	81	9	173	198	17	22	16	10	45	43	2		2			11	34	118	22			8	3	150		14	30	4		71	29	2	30	1	1	1	2	4	2	2	149		3	21
Vaccination site induration	6		3	34		35	2	40	22	2	5	2	1	20	71		2				2	20	22	3			5		49		5				17	46						3				11
Intensive care	11	10	12	146	1	262	4	145	132	22	24	22	8	165	141		1		1	3	19	73	61	25			9		87		13			4	90	90	1	5				5		1	1	102		1	26
Echocardiogram normal	8	3	7	26		52	3	61	48	3	47	8	1	44	33	1	1		1		170	22	25	8			3		25		78				23	23	1		4			2	5	1		37			16
Musculoskeletal discomfort	2	1	15	15		92		3	28	9	10	5	1	32	46						6	70	8	8					2		14				20	11			1				6			2			16
Productive cough	8	1	5	38		189		33	34	2	8	4	3	131	128						9	85	23	3			4		22		13	1	1		18	21		1				3		1		22			12
Lacrimation increased	3	3	17	138		402	2	41	57	7	20	18	2	96	33	1	1				7	50	67	9			1		74		16		2	1	45	81		12					1	2	3	29		1	12
Dyskinesia	30	22	63	454	4	274	19	480	349	24	49	14	13	89	88	7		2	2		8	70	369	61			5		528		21	9	1	1	330	320		95	3		4	6	7	6	3	431	2	2	21
Blindness	19	16	16	43	3	94	3	18	126	11	11	10	3	52	16	3	2				8	25	26	11					20		38	3			43	23		2	1	1			19			11			18
Hyperpyrexia	8	2	5	335		4	1	20	24	4	2	3	1	14	83	1						23	19	70					30			1			38	147	1	1				1				39			5
Hallucination	50	49	24	101	2	98	8	29	66	20	26	14	4	87	48	1		1		2	1	49	35	2			2		44		7	2			35	26		1	2			1	1			10			12
Respiratory rate	1	2	2	9		9		12	12		1	1		8	14						2	38	9	1					9		3				17	18										5			2
Sensation of foreign body			2	16		205		2	18	11	9	6	2	32	18							12	4						3		4				10	11	1						1				1		8
Prothrombin time			1	15		25		10	8	2	1			1	8		1				3	64	3				1		9		2				13	11			1			1				6			2
Blood sodium				4		2		2	5					5	3							82					1		1						1	1										2			1
Feeding disorder	3	2		12		34		26	34	6	8	2	2	16	37	1				1	2	37	9	9			1		23		3				14	5		4				2			1	27	1		4
International normalised ratio	1			8		20		7	5	3				1	10						4	69	3	2					2		2				9	6			1							6			1
Restlessness	161	11	7	186		88	2	312	160	32	5	5	4	51	72	5				2	2	56	211	19			4	1	190		10	5			37	71	1	7	6		3	2	3	2	4	131		2	11
Injection site urticaria	11	2	29	512	1	501	4	164	120	11	29	32	6	106	406			1	1		9	51	220	15			2	1	361		31	1	1	2	367	688	1	16					1	2	1	126		2	10
Alopecia	12	19	26	65	2	57	3	27	305	5	24	7	7	44	14	1			2	1	18	71	20	13			1		31		76	1	1		63	34		2	1				13	2	1	16	1	1	14
Acute myocardial infarction						2			1		2			7	2						20	19									7				1														1
Constipation	47	23	16	259	2	92	4	185	204	14	42	15	5	62	46	1	1	2		4	13	150	101	21			5		129		50	5			48	61	3	16		38	5	4	9	2	5	83		3	27
Neutrophil count	6		1	14		9		20	20	1	5	3		7	15						2	75	20	4			3		13		2				10	4		1								17			4
Depressed level of consciousness	33	18	23	136	1	116	8	243	163	23	21	12	6	64	75		2	1	2		5	19	203	18			5		232		9	4	4		67	71		24	1		2	5	5	3	1	277	1	2	22
Aspartate aminotransferase	1			3		4		4	12	1	2	3		2	3							106	3	1			1								4	1					1				2	4			5
Cardiac failure	14	16	2	13		33		37	35	2	6	4	1	33	38	3					7	28	9	5			2		16		4	2	1	1	5	5		2					1			16			3
Glomerular filtration rate				3		13		4	4	1	2	1		8	9						2	85	5						2		2				5	3													4
Dizziness postural			7	7		37	1		20	3	1	3	1	15	13						3	16	7	4					2		9				15	7													3
Activated partial thromboplastin time	1		1	10		15		11	6	1		1		3	4						3	52	5	1					7		4				9	10										9			2
Deafness unilateral			1	14		82	1		14	4	3	6		27	16							22	1	5					2		1		1		7	6							1			1			4
Ischaemic stroke			1	3		3		2	2					4	4							23		1					2						2											1
General physical health deterioration	11	3	9	56	2	40	3	41	49	22	16	10	5	80	74	1				1	1	38	35	12			4	1	37		6				28	20		1	3			6	3		1	44			26
Electrocardiogram ambulatory			2	1		9			5		1	1		6	3						5	9		1					1		2				2	2										1
Eye irritation	1		14	69		300	1	8	38	6	9	6	2	65	37	2					12	33	14	4			1		27		13		1		29	51		1					1			8			7
Petechiae	157	161	29	558	5	148	10	444	387	21	14	11	5	58	73	3	3	3	1		12	58	252	66			10	1	269	1	9	39	2	1	156	235		47	1		2	17		10	3	271			19
Red blood cell sedimentation rate	9		5	50	1	98		24	34	4	8	2	2	18	53	2				1	11	23	17	4					26		10				33	35		1	2			1	1			7			3
Oedema	685	610	782	1711	26	885	110	637	754	59	98	38	124	225	1279	11	7	9	2	7	120	82	1182	32		1	5	3	1692		308	61	9		335	402		89	2		1	5	57	12	2	280	1	1	37
Paralysis	68	81	48	119	1	410	2	73	256	39	28	6	23	222	106	4	2				5	43	69	17			3		58		13	19	3		58	45		4	2			3	19	1		14	1	1	30
Computerised tomogram abdomen				4		15		6	7		5	1		7	7					1		23	4						4		3			1	10	2	1	1											1
Electroencephalogram	7	5	5	160		118	1	192	82	4	3	5	1	29	20						1	48	75	17			2		152		9	1			125	120		1	1		4	4		3		117		1	6
Facial paresis	2		5	24		66		3	27	5	8	2	2	49	16					1		8	11	3					10		5		1		26	13			5			1				7			24
Hypertensive crisis			2	3		11		1	1	2	2			7	6							3	1								1				1	2										1			2
Polymenorrhoea																	1					6
Amenorrhoea			3	12		6	1		16		3		1	2	1	1					2	12	2	2					1		9				14	12										1		1
Magnetic resonance imaging heart											1			1							1	9		1																						1
Swelling of eyelid				11		10	1	6	9					7	4						1	22	5						7		1				8	8										2			2
COVID-19 pneumonia															1							26
Blood test abnormal	11	1	5	45		69	1	38	40	4	11	6	2	69	60	1	2		1	1	2	118	31	7			1		20		7	5			25	22		2	1			5				36		1	13
Injection site inflammation	89	71	192	405	1	623	19	192	165	9	32	14	30	131	772	1	2		1		35	38	350	17	1		3	2	589		77	17	2		142	258	1	18			2	5	6	4		112	2	1	10
Liver function test	2			15	1	17		6	24	2	3	5		10	14						2	52	3	1			1		7		5				15	10						1				3			4
Pericardial effusion	2	2	7	11		31	3	12	22	1	5	5		26	12						22	18	11	1			4		8		9				7	7			2							5			5
Cardiac stress test	1		1			33			4	1	3	1		11	4						9	15	1	1					2		8				3	3							1						1
Cardiac monitoring		1		5		33		6	8	2	3	1		6	7						1	14	3	5					4		1			1	6	1										6
Epilepsy	38	20	2	205		42	4	127	92	15	7	9	2	33	21	2	1					49	109	26			4	1	144		5	3	1	3	34	43		5	5		2	11		1	1	101	1		28
Antinuclear antibody	2	4	11	32	9	53	4	8	195	2	9	2		44	15		1				3	53	9	5		2			8		13				19	12						1	1			4			11
Hyperventilation	102	133	54	149	1	118	6	130	212	15	32	9	2	31	35						7	15	46	5	1		1		63		17	44	2		42	42	1	5					1	1		22			14
Scan	1			2		20		1	6		1			8	8							33	1	1					2		1	1			3											1			2
Computerised tomogram abnormal	7	7	3	41		86	1	45	51	7	13	9	4	61	77	2	3		1		17	31	19	6			5		17		26	1	1		29	26		1	1			2	5			38			24
Rheumatoid arthritis	7	9	13	72	13	75	1	7	286	3	15	2	7	57	34	1				3	6	137	14	8			1		16		28	2			19	15		1	1			1	84			4	1		23
Haemoglobin decreased	20	17	12	82	2	99	1	153	146	4	23	9	6	94	155	1	1		1	4	8	126	114	37			17		79		8	1			51	34		10	3		1	6	2	1		117	2		28
Hypokinesia	652	664	584	750	31	948	59	595	921	34	72	28	94	311	776	7	5	3	3	4	38	59	260	32	2	1		1	368	3	102	154	4	1	146	157		51	3	4	2	2	89	8	1	168	3	2	35
Chest X-ray abnormal	14	8	5	69	1	133		79	56	4	14	5	6	109	167	2	1		2	1	13	55	35	11			8		48		18				40	68	2	2					3			81			9
Cerebral haemorrhage	8	12	2	11		15		26	27	3			2	11	7							27	13				1		25		3	1	1		5	7		5							1	11			1
Toothache	1		5	6		44			9	2	6	1	1	19	11						2	29	1	2					3		9		1		4	5							2						3
Cardiac disorder	1	1	8	13	1	41	1	13	30	5	11	4	4	23	24						11	16	15	8			3		13		12				8	8	1	5					10	1	1	16			10
Sinusitis	26	28	27	103	4	194	4	62	161	7	24	9	6	107	90	1		1	1	4	27	56	46	10			2		62	2	65	6			35	56		4					26	1	3	46	2	1	22
Acoustic stimulation tests			1	16		21		8	3	1				6	7							9	3	2					10						3	7		1					1			4		1	1
Biopsy	1		3	12		39	1	7	18	3	4	3	2	32	15					1	9	46	5	2			5		6		11	1	1	1	15	11			1			1				3			6
Skin exfoliation	9	2	16	88		144	3	48	72	6	13	6	4	68	78	1		1			17	44	50	5			6		72		39	1	1		62	64		4				2		2		37			10
Mass	3		17	72		169	1	42	46	2	26	7	9	41	138				1		9	30	30	5			5		63		44	1	2	2	53	97						1				32	1		13
Blood urea				4		11		5	12					5	8						1	66	5	1			3		4						3	4						1				6
Magnetic resonance imaging normal	1			8		1		9	9	1	1	1	1	1	5							20	5	3			1		9		2				7	3									1	1			7
Antibody test	1	1	2	22		17		9	12	9	3	8	2	3	9						2	29	6						4		4				7	44						1				6	1		4
Weight	1			2				9	5			1		3	1							65	7						9						1			1								11
Abdominal pain lower			4	9		26		1	16	6	6	6		14	12				1		1	13	1	1					2		1				21	5							2						6
Lymphocyte count	6		1	6		3		9	17		3	1		2	11						2	56	12				3		6		3	1			3	4										4			4
Irritability	149	77	29	1940	3	393	38	2837	1032	21	22	9	15	218	390	11	1	28	3		15	169	1579	79		2	20	5	2363		42	26	1	5	735	1342	3	491		21	11	13	7	53	7	2387	2	17	12
Musculoskeletal pain	9		87	70	1	1750	6	8	178	28	76	26	41	740	845	1				1	28	102	36	17			1	2	78		96		1	2	96	57	1		2			1	57			7		1	60
Ophthalmological examination			1	6		17	1	2	9		1	1	2	10	1						2	14		1					3		2				7	11			1							3
Blood fibrinogen	1		1	3		2		5	3		2	1		1	3							36	5				1		1		1				2	1													1
Computerised tomogram thorax abnormal		1	2	7		21		2	8	1	2	3	1	63	52						5	22	3	3			1		1		5				3	2										4			2
Impaired driving ability	1		2	5		80	1	2	18	8	4		5	51	61						1	28	1	2					5		4				12	3							1						7
Renal pain	3	1	7	6		40	1		23	4	6	2	2	22	18						3	7	1	1					2		4				7	5							2						5
Anaemia	66	84	16	154	2	118	4	176	259	7	18	10	6	64	78	2			1	1	8	154	90	18			13		118		24	30		1	52	64		13		8	1	2	22	2	4	81	1		13
Crying	3515	3240	30	1497	4	337	64	6598	2847	13	20	12	11	164	463	14	2	18	1		2	247	2591	205			33	1	2950		6	987	2	12	522	629	2	416		21	16	34	2	52	46	2627	4	22	24
Pharyngeal paraesthesia			1	4		4			5	2	1			2	3					1		12													1	1
Injection site nodule	15	7	59	219		370	7	279	102	1	23	8	19	55	278		1	1			14	39	117	15			2		256		68	4	3		158	265		22			8	23	1	2		115		2	18
Eye movement disorder	29	19	42	331		99	11	335	226	7	20	8	5	66	30	3	1	1	1		2	45	264	49			4		357		6	6		1	199	194	1	78			5	8	1	4	3	223	3	1	17
Cognitive disorder	16	14	10	156		54	3	63	163	12	20	9	5	27	17	4		2			4	38	32	5			2		65		37	7	2	2	38	31		2	3			1	114		1	18			12
Urinary incontinence	34	51	59	177		156	6	28	137	15	24	9	3	48	43	3					3	35	55	9			4		56		16	5	2	1	112	61		2	1				5			7	1		19
Echocardiogram abnormal	5	4	1	16		25	2	40	33	5	22	3	2	43	22		1		1	1	81	22	11	2			4		16		31				15	12		1	1			2				31			5
Magnetic resonance imaging head abnormal	2			5		1		2	9	4				16	2							18	1	1			1		3		1				4	3										1
Hypoxia	62	119	42	175		144	3	209	185	9	15	9	1	76	89	1					5	122	146	13		1	2		196		10	58	2		41	94		35	1	2		2	6			145		1	2
Ocular discomfort		1		6		7			10	1	2	3	1	6	4							15							1						1	4							1				1		2
Infection	821	1121	202	2790	48	562	77	1545	1559	35	90	27	27	239	549	32	12	22	10	3	40	131	485	37			24	14	874		52	280	4		205	7015	1	118	1	28	5	11	113	20	3	316	4	7	29
Syringe issue			1	19		151		9	21	15	31			7	42							18	1				1		6		1				37	9										1			3
Magnetic resonance imaging head normal				2				3	2	1		4		5	3							13							1		1				1	2			1
Mouth swelling				9		27		1	3	2	4	4		16	5							10	1	1					1						4	7													3
Product temperature excursion issue				7		1		2	5	1	1				4							1	1						1						23	20
Dry skin	14	9	14	95	1	98	1	66	79	4	12	3	3	36	34			1			15	42	52	6					63		44	2	1		62	81		8		1	2	6				25	1		4
Flatulence	11	13	6	44	1	54	2	90	85	2	40	4	2	38	35					2	4	28	41	5			1		62		10	2			20	17		9		12	1	1	4	2	7	49			10
Gamma-glutamyltransferase	2		1	3				5	14	1	2			1	3		1				2	71	5				2		1		1				2	1		1				1				4			7
Polymerase chain reaction	11	6	10	171	2	722	3	81	149	26	26	65	1	98	48	1	1		1	2	58	48	47	27			39		140		17	4			116	185			3			3	10	4	1	55			15
Pregnancy test				7	1	5			4		1		1	3	1						1	4	1								2				3	12													2
Red blood cell sedimentation rate increased	34	24	38	181	12	245	7	96	342	11	55	18	15	173	191	2	2	2	1	3	34	36	91	18			12	1	93		52	10	1		121	75	1	13	7	3		2	53	1	2	69			41
Ultrasound Doppler abnormal	1	1	1			10		4	7	4		1	1	7	18						1	32	2	1					5		3				1	1			1										1
Asymptomatic COVID-19																						4
Wrong product administered			41	128		157	10	127	121		6	2	8	49	130							104	87	11			1		291						167	175										8			18
Dry throat			3	14		77		1	27	5	4	5	1	22	15						1	20	7	6					4		8				13	7							2					1	4
Ultrasound abdomen	6		1	6		14		64	41	2	5	2		8	12						2	41	24	2					26		1				11	7		1	1			1				27			2
Troponin I	1		2	1		5			10	1	32	1		3	7				1		116	22									41				3	4	1												2
Glycosylated haemoglobin	1	1	1	3		15			1		2			6	5						2	26		1					2		5				1	3
Adverse event	150	122	2	51		64	2	29	180	30	6	4		56	102	31					2	50	14	5			12		19		4	1		1	28	34	10							1		6	1		7
Blood bilirubin				4		5		3	19		2	2		4	7					1	2	79	4	1			5		4		1				8	2		1	1							3
Anaphylactic shock	15	8	5	39		40	6	31	53	15	10	10	9	37	71	3			1			28	28	8			3		12		5			1	23	11	1	1	2					1		16	1		25
Spinal pain	1		3	5	1	42		2	20	1	7	1	1	20	27					2	3	21	4						1		3				9	4			1			1							5
Differential white blood cell count	1			57		70		51	31	7	8	3		8	54						5	4	20						44		5				58	53										15			4
Urine analysis normal	26	8	13	227		220	5	293	159	12	25	15	6	96	141	2	2		3	2	24	39	119	30			8		158		40	2	1		154	161		10	1		1	6	1	2	2	184	2		23
Computerised tomogram head normal	9	2	4	60	1	81	1	81	47	16	15	14	2	54	50	2	2		2	3	3	22	28	15					37		13		1		47	46	2		5			4				11			20
Axillary mass		1	2	4		33		3	14		2	2	2	12	28						2	11	4	2			4		3		2				3	4										2			4
Eczema	23	13	10	194	3	55	5	227	160	4	13	7	3	49	47	4		1			24	45	95	24			6		169		33	5		3	56	119	4	10		1	7	19	4	3	2	69	1		17
Ventricular extrasystoles	1	1	4	2		24		1	22	1	1			15	10						11	2	2	1			1		1		10				4	2							3						3
Electromyogram	1	1	12	9		187	1	4	25	7	6	3	3	48	17						1	23	7	1					10		11				14	4	1						3			3			9
Pollakiuria	1	5	19	33	2	73	3	10	73	4	12	4	8	31	43						10	23	11	7			14		17		27				20	16		1					10			9	1	1	8
Depressed mood	1	1	5	25		16		17	19	4	3	1	1	17	10						1	22	6	6					10		7			1	10	8										6	2		3
Pleural effusion	4	6	4	12	1	60	1	10	23	1	6	3	1	40	58					1	6	102	7	5					7		8	3	1		5	6		4					3			65			6
Haematocrit	1		1	7		5		7	8		4	1		3	5						3	47	6	2			1		2		4	1			6	3		1								3			2
Sepsis	85	85	11	86	2	129	7	336	173	6	14	8	4	71	390	3		1			6	78	143	20			11	1	151		9	29			22	46	1	38	1	12		1	2	3	1	242		1	6
Appendicitis			1	3		6	1	1	11	3	7	5		1	3	1				1	1	6	5	1			1		1		1			1	5	2			2								1		3
Platelet count normal	25	10	8	115	1	92	1	163	131	10	31	15	6	72	144		1			1	32	82	73	29			9		59		38	1			85	69	3	3	1			8	2		1	93	2		24
Bedridden			3	4		60		3	8	3	3	5	2	52	58						1	29	2	3					3		4		1		7	3		1					1			2		1	6
Brain natriuretic peptide	1					8		1	1					1	2						1	22							1		1				1											1
Haematochezia	29	11	7	45	1	38	1	748	384	4	20	7	5	25	113	1			1	3	3	75	243	25			17		253		14	11		1	30	18	1	39		9	4	36	1	8	2	426	1	1	9
Metabolic function test normal	3		7	87		119	5	93	72	14	27	12	4	41	62						35	19	35	7			2		52		36				75	75	1	1					7	1		57			14
Gastrooesophageal reflux disease	11	3	5	29		33	2	101	92	4	15	8	4	39	38					1	20	103	52	10			1		69		71			2	15	18		17		1	1		8	1	1	83	3	1	2
Oral discomfort				11		48		1	2	1	2	2		12	8						1	14	1						3		3				7	10										1			2
Extrasystoles	2	3	3	8		10		1	8	2	1			4	1						8	6	3						3		6		1		2	4		1	1				1						2
Skin reaction	2	1	12	57		92	2	23	29	4	8	2	3	26	140						12	24	38	12			2		60		20				34	50		2				1				18	1		7
Painful respiration	1		1	6		52		1	9	1	8	1		11	15						26	18	1	2					1		12				6	5	1		1										4
Sinus congestion	3		5	12		147		2	15	2	10	4	1	49	32						1	19	3	1					9		19				12	5				1			3			4			8
Immune thrombocytopenia	1			18		1		11	12					2	2		1					33	4	2					1						8	10										4
Mental impairment	5	5	12	40		48	3	16	51	11	11	6	1	26	15	4				1	11	25	16	3					19		19	2	1		13	6			1				11			8			7
Blood lactate dehydrogenase				4		5		4	3	1	1	1		5	6						1	47	2	2					3						4	2		1								4			2
Stomatitis	8	13	10	89	1	78		33	41	2	17	8	1	20	22						6	15	19	5				1	29		11	1	1		30	64		3		1				1		16	1		6
Blood pressure systolic								2			2											24	2						3						1											1			2
Auscultation			1	2				1	2			1		2	1							16	3	1					2
Cyanosis	937	937	61	755	3	239	26	1705	893	10	26	7	9	104	299	2	2	3	1	1		113	879	119			14	1	906		6	339	4	4	200	257	1	126		7	8	28	1	14	5	694	2	4	25
Coma scale	1			2		4		3	1		1	1		5	1							48	1	2											1	1										1
Hyperaesthesia	28	8	30	63		152	2	50	85	25	17	14	8	46	125	1		1		1	6	28	52	6			1		54		18	2	2		41	54		1	2			1	5	1		27		1	22
Periorbital swelling			2	11		10		5	2			1		10	2							13	1						2						4	8										1			1
Muscle fatigue			3	2		33	1		15	5	4	3		19	13						3	9	2	2					4		11				8	2							1						1
Poor quality sleep	11	1	3	76		95		64	53	5	6	4	1	43	84						4	29	30	4			2		46		15			2	56	55		1			1	5	1	3		27			4
Breast swelling			2	3		17			1			1	1	9	29							6	1						1						5	3													1
Troponin normal			1			16			6		20			11	12						68	10	2								30				3														3
Circulatory collapse	5	4	8	30	1	27	4	24	65	16	12	2	3	16	29	1			1		1	14	37	5			1		35		1				33	8	1	3	2			1		1		17			53
Electric shock sensation									1						2							7							1																				1
Red blood cell count	2		1	4	1	7	1	10	11		1	2	1	6	12							50	10	4			5		8		1				1	2										4			3
Alanine aminotransferase increased	26	14	20	79	2	94	4	98	533	9	58	41	12	79	104	3	3		1	4	17	86	75	18			3		47		17	3			226	56	1	4	3			6	9			57			164
Blood alkaline phosphatase	1			3		2		1	6		1	2		3	2							68	4	1			1		1						3	1										2			2
Blood cholesterol						2		1	2					5	3							27									2				1
Blood lactic acid		1		5		11		7	12	1	2	2		6	22	1				1	2	36	3	3					5		2			2	7	1	1									8			2
Scan with contrast				5		20		3	7	1	3		1	6	7						1	11							1		2				9	5										2			3
Sensory loss	5	1	13	19		129	2	2	51	12	11	2	4	81	26				1		4	20	10	7					7		10				27	10							3						18
Skin lesion	24	5	13	445		208	1	167	119	12	60	16	5	85	98	1		1			196	46	139	20			12		200		114	3	1		300	1152		9				2	2	1	1	111	1		23
Gastrointestinal disorder	38	53	19	232	2	102	6	142	256	11	34	13	10	66	30	1		3	1	3	16	40	108	15	1		5		141		54	21			50	50	2	16	1	23	1	2	48	7	1	52	1	4	22
Tension headache			2	4		10		3	8	5	2	1		7	7						2	6	4				1		4		4				1	1							2						1
Haematoma	1	3	9	78		78	1	31	55	4	2	1	2	31	51						1	35	27	19			1		46	1	3	1	1	1	27	31		6	1			2				44	1		16
Ultrasound scan abnormal	16	2	7	36		55		107	102	4	9	4		57	103	1				1	4	12	43	8			8		52		9	4		1	35	28	2	5	2		3	11	2	1		74			28
Vaccination site bruising				7		31		6	1	1	1	1		2	7						1	5	1	2					4		1				6	5					2	2				1			1
Vaccination site inflammation	3	1	1	11		19	2	12	5	1	4			14	41						1	8	10	1					17		2	1			4	10						1				3
Oral pain	1	1	4	24		53		6	11	2	11	4	1	15	12	2			1	1	1	17	9	1					10			1			15	25		2								4		1	7
Dysuria	4	7	14	39		67	2	16	108	7	14	8	6	38	29	1					5	16	17	5			20		20		11	3			22	22		4					5			5			9
Hyperacusis	9	2	9	68		33	2	26	40	6	5	6	1	18	10	3					2	17	16	4					25		6				18	15			3			1	3		1	2			7
Blood culture		1	4	110		110		154	68	2	9	6	1	27	146	1					10	46	52	3					91		7	1			83	91		8	1		1			1	2	90			4
Delirium	75	69	16	85		82	2	59	110	12	20	9	6	87	60	1				2	5	23	24	5	1		1		39		7	13	1		33	29		4		2			3	1		7			5
Generalised tonic-clonic seizure	9	4	1	94		21	3	43	31	4	3	5	2	26	13		4		3			43	25	16		1	2		38		3				53	54	2				1					4	1		5
Blood urine present		1	7	18		26	1	23	14	3	11	6	1	26	32					1	1	14	13	6					16		5			1	18	18										13			6
Adverse reaction	6	3	6	51		104	2	21	25	7	7	5	3	61	142	1					3	31	8	6			4		19					1	14	25							1			6			6
Skin disorder	49	55	32	100	1	70	2	99	192	10	14	6	2	37	47	3	1				18	40	41	10			5		75	1	50	16			31	78		5	3		2	2	6	2		15			8
Product administered at inappropriate site	9		6	16		61		14	18	30	2	1	2	41	75						1	43	13	1					10		2				14	12													1
Mean cell volume	1			3		5		4	5		1			3	4						3	37	1	1			1		1		1				3	2										1			2
Aspartate aminotransferase increased	35	22	20	96	2	102	6	121	502	9	51	36	12	75	110	1	4		1	1	21	88	70	18			5		58		25	3			204	60	1	5	3	1		9	11		2	70			134
Cardio-respiratory arrest	8	5	2	14		11		76	28	2	1	2	1	21	22	1	3					24	22	2			3		22		1				3	8		7				7		1		49			1
Agitation	4316	4819	84	1812	4	140	98	5099	2377	35	33	11	13	69	91	12	3	10	1	2	9	63	1352	38			6	1	1811		31	1555	1	1	82	426		320	2	119	2	6	3	10	4	743		3	12
Influenza virus test negative	3	3	3	120		742	2	110	42	8	16	14	3	58	121					1	6	32	23	7			3		46		2	1			88	75										24	1		4
Neurological symptom	13	5	16	54		56	2	36	91	15	12	11	4	46	19	3	1	2		2	5	20	16	4			1		31		7	3	1		13	18		5	1	2	1	2	29	3		19		1	9
Fear	2	1	3	27		34	1	17	17	6	3	3		28	18	1						19	11	7			2		13		1				18	16			1					1		7			3
Rash vesicular	21	27	20	886	3	171	4	210	143	5	26	13	4	45	57	2	2	5		1	94	60	185	9			1		261		35	5	1		310	2655		71			1		1	7		206		1	24
Monoplegia	7	4	8	6		66	3	6	33		3	2	7	35	69							16	8	6					5		2	2			10	5			3					1		3			15
Red blood cell sedimentation rate normal	19	4	14	68	1	116	1	22	63	11	41	15	3	59	52						55	27	43	13			5		16		61		1		71	51	3					1	23			12			28
Sinus tachycardia	2		3	6		27		5	8	4	1	2	1	11	14						3	19	5	3			1		4		1				3	2		1	1							4			4
Blood creatinine increased	8	5	13	20		89	2	35	67	12	12	12	6	102	90	1					7	97	24	5			4		20		8				16	10	1	1			1		5			26			5
Sluggishness	3	1	7	23		47	1	21	13	5	8	2		18	22		1				4	24	24	4			1		25		11	1			18	15							2	1		17			3
Respiratory failure	13	6	5	42		103	1	43	41	6	4	11	5	77	70	6			2		1	35	37	5			10		26		3	2			17	20		3	1					1		50			10
Oligomenorrhoea				1		1			1	1												5																					1						1
Paranasal sinus discomfort						10				1				7	5							13													1	1
Magnetic resonance imaging abnormal	1			2		5	1	3	14		1			26	23							37		1			1		2		1				3	2													1
Incorrect product formulation administered				8		4		30	21	2	2	7			7					2		4	2						3						6	6										2			1
Ultrasound scan normal	7	1	8	44		108	1	68	73	5	7	5	3	49	139						4	26	57	10			1		61		7	1			28	50	1				2		2		2	78		1	22
Altered state of consciousness	25	2	10	36	1	53	1	66	45	13	16	7		30	70	1	3		3	1	1	48	59	15		2	1		33		5	3	1	1	41	20	1	1	1		1	6			3	32			13
Low density lipoprotein						1									1						1	29													1												1
Mental status changes			3	22		68		26	16	1	9	10	2	23	33						7	16	15	4					23		13	1			27	25		1			1	1				11			4
Sudden hearing loss			1	5		21	2		2	9	3	2		6	11						1	10		4											3	1													7
Vaccination site movement impairment	4			1		3		2	2		1			4	11							3	2	1												1
N-terminal prohormone brain natriuretic peptide						1									1							24																								1
Dry eye			7	8	2	65		2	33	3	3	2	3	19	16						2	11	2	4			1				10				8	4							7				1		5
HIV test				6		10		1	6	1	2	12		3	4	1					6	42		1			1				2				4	8										1			3
Troponin T				1		1			2	1	9			2	2						8	12	1								6				2				1										1
Pulmonary pain						7								3	8							10	1
Electrocardiogram ST segment elevation			1	1		3			4	1	13		1	7							68	12		1					1		31		1		6	2													2
Flank pain	3		6	13		42		1	12	4	8	4		19	30	1					4	8	5	1					4		9		1		10	11							1						10
Hemiplegia	22	22	8	41		34	2	25	60	8	5	2	4	24	7	2						7	17	6			1		20		4	2			17	13		3				2				12			5
Glossodynia		1	3	17		53			14	3	5	6		17	11						1	17	6	3					8		2				7	13		2					4	1		1		1	2
Angiocardiogram													1									13
Eye disorder	74	102	40	161	2	144	10	171	269	8	17	13	9	41	25	3	1	1			12	23	88	11			9	1	123		19	31	1	1	62	79		15	2	1	3	1	26	1	5	79			19
Computerised tomogram head abnormal	1	4		28		8	2	15	19	4	1	3		26	23						1	24	6	3			1		7		2				10	14						2				3			1
Endotracheal intubation	13	5	5	79	2	109	5	102	48	14	12	15	8	74	45	2	2		2	1	5	29	29	10			4		41		3	1		3	49	62	1	3				1		1	1	60			11
Pulmonary thrombosis						1																16
Ejection fraction						1			1		1	1	1	1	2						6	13					1				3					1
Specialist consultation				2		1		1	1		1			1	1							12							2						4
Sudden death	3	5	1	6		14		21	15	1		1		17	17						2	39	6	4			6		8						6		1					4				11			2
Colonoscopy	1	1	2	1		9		2	4	1	1	1	1	7	4					2	2	22	4	2	1				3		7				7	5	1						3					1
Feeling jittery	1		5	13		32	1	15	17	4	3	2	1	11	9						1	4	8	2			1		9		8				8	8		4								13			1
Monocyte count	5		2	5		3		8	17	1	3	1		4	6						3	35	7	1			3		4		1	1			3	2										2			4
White blood cell count normal	57	17	18	172	2	140	2	304	206	10	40	13	7	72	197	1	4	1	2	1	33	61	121	41			31		121		35	3			105	119		4	2	1	3	15	1	1	2	156	2		25
Blood pressure fluctuation			1	3		15	1	2	9	3	5	2	1	12	13						2	8							3		8		1		6	1			1				1			1	1		3
Groin pain			3	8		33		5	12	7	1	5		7	16						3	12	6				2		5		15		1		7	6						1	10			2			3
Therapeutic response unexpected			1	1		1		1	1	2				9	4							15					1									2													1
Injection site hypoaesthesia			2	4		40		2	11	3	4	1	1	14	32						1	6	2						1		4				8	1													3
Blepharospasm	2	1	2	16		32		13	21	5	3	4		10	4		1		1			7	8	2					15		6				18	13							2	1		8			1
Exposure to SARS-CoV-2														1	1							6
Tongue discomfort				1		4			2	1	2	1		2	2							11									1					1
Product preparation error	1			63		2		138	25	4	8	17		2	16							15	2	6					10		1				22	46										6			1
Biopsy skin			4	15		26		3	10	4	3	1		16	13						6	49	2	4					3		6		1		5	13					1		1			2			1
Product administration error				3		2		1		6	99			8	9					1		9	2						1						2	2
Vitreous floaters			4	4		16			8	1	5	5	1	11	8							6	3	1					2		3				4	1							6						1
Catheterisation cardiac			1	1		11		1						6	5						13	7					1				7				2	1							3						2
Haemoglobin normal	48	23	7	159	1	99	2	227	182	10	29	16	6	65	147		2		1		39	50	120	35			26		116		40	3			115	109		5	1		1	8	2			135	1		21
Respiratory disorder	116	141	32	129		175	12	250	228	10	12	10	7	69	88	7	1	2	1		7	24	140	8			9		188		27	53	1	1	35	58		29	1	4	1	5	3	3	4	112			7
Abnormal dreams	7	6		8		24	2	4	10	12	3		1	13	11							10	2						3		5	1			5	3		1											2
Hypopnoea	4	1		18		34	2	27	22	1	5	2	1	11	15						1	18	8	3					13		1				15	15										4			3
Eosinophil count	5		1	6		8		5	11		3	1		7	6						3	44	5				3		2		3				3											1			1
White blood cell count decreased	15	9	10	129		53	2	97	79	13	23	21	3	49	112	1	1		1	2	10	50	74	16			5		54		14	1			59	61	3	4		1	1	3	3	1		70			24
Skin swelling	1		1	10		18		3	3	1			2	11	26						2	12	2	1			1		6		2				4	13										2			2
Stress	2		3	10		25	1	3	15	7	4	4	2	20	10	1					1	34	4	2					3		7				10	11					1		3						8
Tachypnoea	16	13	4	41	1	45	3	67	37	5	1	2		22	37	1			1		4	23	38	4			1		38		1				13	20		8				2		3		55	1	1	2
Aphonia		1	1	14		43		3	7		3	1	2	36	15	1					1	14	2	2					4		1	1			3	1		2					1				1		3
Polymyalgia rheumatica			2	1		60	1		15	1	1	3		54	26							8	1				1		4		2				6	1			1				9						4
Heart rate abnormal			1	4		13		2	4	1	2			6	2							4	1						1						4	1										1			2
Psoriasis	7	1	6	16		15	6	4	58	4	9	2	2	29	13	2					6	56	6	2					4		16				9	10							3		1	2			11
Blood calcium			1	5		4		5	3		1			1	5							32		1					4						4	1										2			1
C-reactive protein normal	32	6	11	129	1	77	1	188	151	14	41	11	2	62	83		4		5		29	45	103	27			18		73		37	1			80	62	3		2		2	7	7	3	2	118			36
Renal function test	1			6	1	9		3	2		1			2	6							24	1	2					4		3					3										2			1
Nervous system disorder	61	57	22	170		90	5	209	379	34	23	16	8	63	32	3		4		2	6	34	81	14			2		193		19	26			28	55		9		2		2	105	4	1	65	2		27
Blood electrolytes	1		1	8		24		7	7	3	2			3	8					1	2	11	1						7		2				6	8										9			2
Chromaturia	4	2	6	8	1	23		11	45	3	18	12	5	33	32					2	3	16	12	7			1		8		8				39	11										2	1		27
Blood pressure abnormal				1		21			4		3	2		12	8						1	9	1						1		2				6	2													1
Immunoglobulin therapy	17	10	11	148	1	291	3	135	129	22	13	19	11	218	83	1	2		1		3	42	60	19			8		36		3				101	82			2			13				50			23
Skin irritation	1	1	12	51		90	1	36	26		15	3	3	27	73						12	22	38	2			1		49		25				17	41		3			3	1	1			13			7
Grip strength decreased	2	1	6	21		124	2	4	25	4	6	5	2	44	38						1	24	8	1					11		18				17	13						1	7			1			13
Nightmare	2		4	16		19	1	2	10	8	6	5	5	8	16						3	9	8	4					11		10				9	7							4			1			3
Respiratory rate increased	10	18	7	65		87		93	54	3	11	6	3	38	48			1	1		1	45	72	7		1	18	1	84		6	15		1	51	59		13				1				88		1	6
X-ray normal	6	4	9	40	1	155		71	52	2	7	4	8	67	74	1					4	25	23	6			2		45		14	1		1	48	36	1	2	1			1	9		1	43			14
Blood glucose decreased	3	1	2	34	2	69		21	31	2	6	4	2	41	16	2					1	23	13	9			2		20		6				24	21		2	1				1			18			6
Rheumatoid factor			5	11	1	31	1		37	1	4	1		11	11					1	3	17	1	2					2		6				11	5							32						13
Eye haemorrhage	4	3		7	1	16		6	20	1		1		7	5							15	1	1					3		1				3	5	1			1						5			6
Laboratory test abnormal	137	183	165	878	46	506	22	626	1576	49	147	56	53	260	378	29	2	5	8	6	176	54	497	62	1		15	4	629	1	168	68	5		353	575	3	106	6	21	6	11	171	16	10	454	3	1	148
Face oedema	340	476	247	1058	15	562	39	467	890	101	63	39	26	122	109	8	2	1	4	6	11	21	231	19		1	2		420	1	25	76	10	1	134	273	1	28		2			13	6		95	2		14
Gastrointestinal pain	2	1	3	6		16		5	4	2	13	2	1	15	6	1				1	1	8	2						6		1				3	3							1			3		1	3
Acute respiratory failure	2			6		14	1	11	4			1		21	12							16	2						1						3	6								1	1	5			1
Injection site discomfort	4		13	44		133	3	24	27	6	12	2		44	157						1	14	25						38		16			1	29	67					1	2		1		4	1		3
Blood creatine phosphokinase increased	13	7	27	44		106	2	37	139	12	44	10	11	86	96		1		1	1	82	25	37	10			1		30		50		2		56	25	2	1	4			3	5			18			36
Tongue disorder	37	41	15	52	1	127	1	48	94	9	15	6	2	14	15	1	1			1		9	27	1			1		35		8	8	1		28	24		4					1	1		13			5
Sinus pain			1	1		2			1					4	4							10		1					1						2	1							1
Haematuria	11	15	23	50		40	7	17	88	1	8	5	5	54	28	1					4	11	21	7			11		23		12	3		1	21	19	1	5					3			11	1		10
Skin tightness	3		4	32		76	1	5	8	4	4	1	1	27	108						3	15	24	4					49		20			1	17	38						1				3			4
Injection site paraesthesia			2	2		45	1		16	6	3		1	8	26							8	1						2						3	5													5
Maternal exposure during breast feeding				5							1	2			2							2														2
Blood potassium decreased	2	2	2	10		45		20	25	3	8	3	1	24	27						3	15	10	4					10		7				16	5			1			1	1			9			6
Renal failure	7	8	5	20		67		18	49	3	8	20		40	60	1					1	23	11	4			1		9		9	2			17	11							1			14			7
Blood albumin	1	2		4		1		2	8				1	5	4							34	4	2			1		2						3			1								3			1
Culture urine	1		1	67		49	2	96	48	1	2	2		15	29	2					1	27	31	1			1		46		1				51	61		4			2			1		59			4
Limb injury			3	8		27		5	8		1	1		15	16						1	10	2	5			1		2		4				4	9										3			1
Mammogram			1			6				1				1	1							10
Photopsia			1	6		25	1	1	10	1	7	4	1	9	5						1	10		2							1			1	5	4			1				1
Pulmonary oedema	70	79	3	22		33	1	102	76	2	5	3		27	32		2		1		2	26	42	1	1		3		48		4	13			3	10		15					1	1		34
Lymphadenitis	1	1	11	64		44	1	18	32	12	7	5	1	23	52						35	8	24	6			17		34		8	1	1		11	21	1	2	1							17			7
Streptococcus test negative	4	1	5	198		71	2	69	51	7	15	9	2	50	53					1	8	16	37	9			1		76		9		1		111	125	1									14			4
Body temperature decreased	12	1	6	41		65	2	56	37	4	3	2	1	23	44							19	34	6			2		42		1			2	19	25	1	5	1		1		1			49			7
Mouth ulceration	22	26	19	99	7	52	6	42	95	11	8	11	4	27	19	5					11	21	17	6			1		33		24	4	5		24	61		2		1				1		10			5
Oral pruritus			1	3		49			7		5	2	1	12	5					1		10	2								1				5	6										1			2
Blood immunoglobulin G	6	4	2	130	2	14		24	15	4	4	19	1	11	10				1		6	41	15	3			2		10		6				22	40	1	1					5			9			7
Pelvic pain	3	3	6	14		23			30	4	2	2	1	9	11						1	15		2							8	1			23	1							9			1		1	8
Cardiovascular disorder	29	41	12	27	1	53	4	45	86	14	16	6	3	16	27	4					5	10	20	4	1			2	26		14	9			6	10		4	3	1			6		1	9			31
Odynophagia	1		4	14		30		2	13	2	5	6	2	14	9						6	20		1			1		1		6				9	4							3						5
Blood creatinine normal	14	2	4	53		56	1	78	71	7	30	19	3	58	81		2		1	1	20	24	32	17			5		27		33	2			41	32	1				1	4				54	1		23
Sciatica	2			1		10			19	1		2		16	8							12	3	1							1				3	4							10						3
Haemoptysis	1	2	4	6	1	37	1	7	25	4	4	4		27	36		1				2	88	7				1		6		11				8	4		2								8			4
Scan brain			4	19		59		23	19	3	7	3	1	13	12						4	23	21	1			1	1	23		7		1		28	13			2				3			30			5
Breast tenderness			2	2		13			2	3	2	1		3	9						3	7	1								2				1														2
Serum ferritin				1		4			1	1				4	2							13													4	2
Acne	2	2	10	65		49		18	60	5	16	3	2	19	20	1					28	21	17	4			1		22		40	1			39	112		3	1			1			1	11			4
Allergy to vaccine	5		10	41		72	8	14	21	2	6	1	89	89	140					1	2	29	15	1			1		29		3		2	1	32	38							1			16		1	5
Autoimmune disorder	5	1	3	33		31	2	6	81	8	8	4	7	35	17	1					3	42	8	5	1		1		10		20			1	17	15							77			2		1	19
Extensive swelling of vaccinated limb	13	6	4	32		51	2	21	21		2	1		29	94							13	22	3			1		121		3			1	5	8										5			5
Resuscitation	16	8	2	56	1	46	1	137	77	3	4	1	2	28	33	1	2		2	1	3	24	35	13			3		40		2	2		3	27	22		4	1			8				70			10
Blood magnesium	2	1		7		11		5	4		1			4	16					1	2	10	1						3		2				6	1										2
Thyroid function test	1		1	8		18		2	8		2	1	1	8	6							14	3	1					2		2	1			6	4			1										3
Blood triglycerides				1				1				1		1								26	1												1											1
Asthenopia			1	7		8				1	3	1		10	3						1	4		1					3						2	3										2			1
Bronchitis	109	99	13	152	3	216	14	191	171	10	12	6	8	170	164	5		1	1	1	16	75	90	17	1		10	3	92		24	20			35	58	4	4	5		1	3	4	1	4	90	3		15
Overdose	7	3	4	17		184	2	35	33	3	6	3		7	17	1	1					9	35	2			1		28		1	1			35	36		5			1	1	1	1		14			8
Supraventricular tachycardia	5	6	2	7		20	1	8	19	5	3	1		13	5						2	7	3	2			1		4		5	1			4	4		1				1	1			5			2
Ear swelling	3		1	19		25		8	7	1	3	2		10	10					1		16	2	1			1		8		1				8	24									1	1			3
Weight increased	6	3	12	23		37		15	70	3	11	2	4	25	23	1					17	50	12	2			2		13		59	1			20	11		1	1				18			7	1		5
Motor dysfunction	8	7	7	38	1	46	2	19	99	7	6	2	2	44	20				1		1	17	12	5			1		23		6				20	13		2	1				2		3	16	1	1	5
Angiogram pulmonary abnormal						1			1													6									1
Gout				3		16			5	2				11	5						2	12									6				3	1							4						2
Immunodeficiency	3	2	1	28		2		19	9	1	1		2	12	29							25	13				4		8		2				7	15						2				4			1
Exercise tolerance decreased			2	4		17			8		8	1	4	15	7					1	12	4		1				1			11					2			1				1						3
Pharyngeal hypoaesthesia				5		17			8		2	1	1	6	3							10							1						8	3													2
Protein total		1	1			4		5	17	3	1	4	2	4	3							24	5				7		2						4	2										4			1
Local reaction	22	6	61	426		718	15	161	124	13	30	17	11	106	854	1				1	28	53	308	23			2		515		101	3	2		325	789	1	3			1	2		2		103			19
Tongue pruritus				5		8		1	2		1	1										3	1						5						1	5
Periarthritis			9	1		159		1	10	1	3	1	3	103	66					2		16	4	2					5		3				5		1		1				4						3
Thrombophlebitis superficial						1			1						2							7	1								1
Lung disorder	117	154	21	80		169	6	156	187	3	6	2	4	87	89	3	1		1	1	7	30	46	4	2		5		52		15	32	1		10	45		4	1	4			4	2	1	36			7
Sinus headache	1		3	6		55		1	7	3	2	4	1	32	10						1	7	1						3		8				3	1							3				1		5
Blood potassium normal	11	3	5	47	1	49	2	62	64	5	20	9	3	41	69					2	18	18	39	13			7		31		24	1			28	31			2		2	3				50	1		16
Lipase				4		5		3	2	1	2	2		3	2					1		15	1						1		2				3	1										2
Ear infection	10	3	3	198	1	45	3	97	55		6	3		36	29	2	1	1			1	42	49	17			3	1	94		2	2		1	85	123		12	1		3	2		3	4	82	1	1	6
Respiratory arrest	29	21	9	121	1	66	4	267	138	6	8	2	3	36	36	2		1	1	1		37	132	18			4		163		4	5	1	2	67	73		20			1	7		1	1	192		1	11
Pain assessment																						21
Cerebral venous sinus thrombosis								1	1													17
Body mass index						1		1	3						1							22																	1							1			1
Dermatitis	3	4	7	58	1	51	3	46	54	1	18	5	2	29	36	1	1	1			52	19	28	6			4		37		51				33	54		3					4	1	3	23			10
Cytomegalovirus test	3	2	2	9		7		11	9		2	2		6	2						1	35	1	2			2		2						7	3										7	1		5
Injection site discolouration	7	1	9	159		305	2	144	56	2	6	8	2	35	149				1		15	24	103	3			1	1	177		15		1	1	95	161		8			3	5				74	1	2	2
Coordination abnormal	55	68	57	325	5	195	9	112	263	23	28	10	12	66	32	4	1	2	1	2	9	25	59	8				2	98		29	16	5		59	153		8	2		1	1	15	3		45		1	22
Cardiac failure congestive	1	1	2	4		49		6	7		2	1	1	11	23						7	16	3						4		2				2	4										5
Formication	4		3	6		43			35	4	8	6	3	14	10						1	12	4						6		4				3	6						1	1						16
Magnetic resonance imaging neck						1			1					1	3							9																											1
Computerised tomogram abdomen abnormal		1	2			18		25	22	2	6	3		25	14					2	1	10	3	5			2		4		3				4	4	2									3			3
Dermatitis allergic	11	3	3	36	1	23	2	26	36	2	5	1	4	14	21					1	4	11	26	4			2		20		4		1		12	19		1				2				6			15
PO2	1	1		2		1		1	1					1	2							24	1	1											1											1
Erythema multiforme	76	71	25	355	1	124	8	286	226	23	24	6	7	44	86	2	2	4	1		104	16	168	18			2	1	288		32	14	2	1	139	251	2	33		5	1	3	1	6		163	1	3	13
Fibromyalgia	5	1	16	13	2	42	2	2	154	9	12	3	3	36	12	1				2	7	26	8	6	1		1		3		54		1		17	10						1	41	1			1	3	8
Respiration abnormal	11		1	34	1	33	1	75	29	6	4	3	2	11	21						4	30	43	9			3		44		2				16	10			2			2		1		60			1
Magnetic resonance imaging spinal						3		1						2	1							21							2						1	2
Haematocrit normal	15	5	4	96	1	61	1	91	73	5	21	8	5	31	74		3		1		29	15	35	20			11		44		35	1			54	59	1	1				3	1			49	1		10
Blood chloride	1			2		3			6			1		2	3							14	1				1		1						1											3
Mean cell haemoglobin	1	3		2		2	1	6	7	1			2	2	6							36	4				1		3						4	2										1
Fibrin D dimer normal	1					9		4	8	2	7	3		3	6		1		1		9	11	4	1					3		9				4	2										2			1
Viral test	1	1	1	54	1	19		23	18	5	9	9		10	11				1		14	17	5	5			2		9		7				19	48				1					1	5			3
Blood count	8		1	12		4	2	20	10	1		1		2	10							24	19	6					15						1	4						8				16			1
Injection site haemorrhage	26	27	35	89		288	1	103	103	5	5	3	11	43	96	1		1			3	18	83	8			1		123		12	9			61	59	1	15			2	5	1	1		42		1	14
Blood sodium normal	14	4	5	50	1	43	2	87	86	5	23	11	3	35	55		2		1	1	17	19	52	11			10		45		26	1			31	31			1		2	4				62			15
Bronchospasm	5	2	2	45		67	2	18	44	7	6	3		41	32	2						11	25	10			3		25		1		2		12	17			1				1			19		1	4
Emotional distress	14	4	4	111		44		171	101	3	3	1	1	32	49							42	78	17			1		114			4		2	34	51		5			1			4		66		1	6
Rash maculo-papular	475	749	209	2674	68	492	40	1174	1240	58	75	38	20	94	169	34	10	4	1	4	185	66	402	36			5	7	807		114	211	7	1	422	1916		100	5	6			11	14		353	1		15
Blindness unilateral			1	6		30		1	14	2	4	2		9	9						2	6	2	4					2		2				3	4							1						5
Rectal haemorrhage	3	4	2	8		5	1	26	24	2	12	1		11	17						3	17	18	5			1		20		14	1			7	4		2			1	1	1			27			4
Tunnel vision	1		2	3		13			7	3	5	3		5	5						2	1	2	5					2		15				9	1													3
Vitamin B12				6		14		2	2		3	2		11	4						1	8	1								3				9	2							1						2
Eating disorder		1	1	42		30	2	34	30	3	4	1	1	18	22							21	14	6			1	1	20		2				19	26	2	2				3	1	4	1	16			4
Ophthalmic herpes zoster				3		8		1		1			1	16	11							13													1	14										1			1
Thinking abnormal	47	41	27	67	1	63	12	32	130	14	18	3	4	31	22	4					6	13	8	5					15		37	6	3		21	13		1				1	14			2			2
Hypotonia	1421	1371	104	868	3	217	48	2321	1272	23	27	9	21	133	232	11		7	1	2		126	1231	112			17	1	1345		5	407	2	2	219	296	2	173	2	16	15	18	9	18	15	1088	2	4	21
Feeling drunk			1	9		18		2	7	4	2	1	1	7	6							5	1	2					2		6				9	4			1		1					2			1
X-ray limb			4	10		109	2	5	10		4		4	32	53					1		16	3	1					10		1				13	12										4			4
Haematocrit decreased	16	4	8	31		69		108	115	2	15	10	1	44	96		1				11	68	72	10			22		39		16	1			33	19		9		1	1	3	1			72	1		19
Breast mass				2		4			4	1	1			2	2							4		1							2					3													1
Purpura	48	54	12	172	1	78	5	173	184	3	10	4	4	60	63	3	3	1	2	1	4	27	80	20			3		106	1	3	18	1		42	63		9		2		12	2	6	1	93	1		10
Seizure like phenomena	3		3	57		55	1	77	64	3	5	1	1	8	11							12	27	11		1			46		4				80	50		1						1		7			5
Hypomenorrhoea											1											3									1				1
Blood thyroid stimulating hormone normal	1		6	17	1	39		2	59	2	14	8	4	29	17						8	13	6	7			8		4		24				25	6			1				1			3			13
Bursitis	2	1	29	8		254	2	1	39	7	5	2	7	98	80		1				5	29	4						4		19		1		10	3			1				23						7
Hepatitis C virus test			1	1		6			9		1			2	4							36	1												2	1										1			6
Coagulation test				3		2		3						1	1						1	6	2						3		1				3	2										2
Ejection fraction decreased		1		3		7	1	5	6	2	5			12	6						24	10					5		4		8				2	2													2
Blood gases	1			5		11		7	7	1				6	5						1	21	2	3					4						3	3										8
Exposure via breast milk						2			1		1											4													1	4
Adverse drug reaction	3		3	16	1	19		6	17		3	1	1	33	34	1			1		4	20	4	2					13		7				5	5			1							2			3
Vasculitis	21	28	15	76	3	102	4	45	210	7	16	4	7	62	37	2			1		6	22	32	12					45	1	13	10	2		41	35		4				3	10			24			21
Diabetes mellitus	13	16	20	94	2	54	5	24	144	2	12	7	2	27	46	1			4	1	11	26	19	8				1	21		41	2			20	44		5	1	1			10		1	21			11
Eyelid ptosis	5	3	5	24		58		17	31	7	7	5	3	35	11						2	6	16	5					21		5				22	23	1	4	2				6			9			13
Audiogram		1		9		11		2	2	3				1	3							4							2		1				2	2													1
Positron emission tomogram						7		3	5		1	1		4	3							28	1						1		2				2	2	1						1			2
Cardiovascular examination						1			1		1	1		4	3						1	16		3											1											1			1
Conjunctival haemorrhage			1	2		5		6	14		1	1		3	2						1	3	2	2			1		2							1						2		1		2
Hyponatraemia	18	16	2	25		46	2	39	29	1	5	3	2	19	35	1						7	15	2					27			3			3	7		5		1						21			3
Chronic obstructive pulmonary disease			1	1		33	1	1	2				2	101	56							134		1							3												1			10			1
Ear, nose and throat examination			1			1			4					1	2							4		2					3						1			1								4			2
SARS-CoV-2 antibody test negative			1	2				1						4	2							14		1					1						1	2										1
Lung opacity			1	2				3	1					6	5							79							1						1	1										2
Endoscopy			4	3		9		5	5		2	1	1	4	7						2	18	1	2	1						4			1	5	8										2		1
High density lipoprotein						1									1							24													1
Cardiomegaly	10	10	2	9		21	1	16	21	2	6	2	3	18	17				1		11	10	10	2					10		6			1	5	1		4					3	1		9			1
Computerised tomogram neck				1					1					2	1							7							1						1	1
Aphthous ulcer			1	9		1		2	7		1			1	4							9		1					1						3	8
Blood sodium decreased	10	3	3	35		45	1	44	28	2	5	2	2	44	66					1	2	58	24	8			3		31		3	1			18	19		3	2							36			8
Secretion discharge	2	1	1	23		43		14	7		2	3	3	27	20	1					10	17	12	4					19		3	1			21	28		1								2			1
Fluid retention	1		4	17		43	2	6	9		6		2	14	62					3	2	12	16	1					16		6	1			9	19		1					3			5			7
Sinus disorder	1		4	3	1	38		4	6	4	5	4		29	9							13	3	2			1		3		7				5	2							1			3			4
Appendicectomy	1	3		4	1	6	2	22	24	2	2	1	1	2	9						3	5	17	1					18		2	1			4	3		1								20			2
Cardiac discomfort						1							1	1	2						3	1					1				1																1		1
Serology test			1	16	1	8	1	10	26	5	4	2		3	7							16	9	4			1		11						6	7		2								32			10
Vaccination site discomfort				1		4		7						1	5							5		1												3					2	1
Visual field defect	3	2	14	18	2	49	1	2	82	10	8	3	2	33	4	2					1	15	8	6					2		11				18	4	1												8
Gingival pain				5		25		1	6	4	3	1		5	3						1	7	1						2		1				3	2													4
Therapy non-responder				14				10	213						14							7	1						1						11	4										1			28
Acoustic stimulation tests abnormal				9		10	2	1	3	3	1	1		3	2							10	1												1	2										3			1
Upper-airway cough syndrome				6		32		1	1	1	3	1		17	10						2	6									4					1
Hepatic enzyme increased	1		6	15		26		10	48	8	24	6	4	16	14		1			2	2	22	15	4			2		8		8				50	11		3				1	1			12	2		73
Hypoglycaemia	19	11	9	35	1	53	1	36	46	1	1	3	4	31	15	5					1	16	11	4			2		18		2	3			10	11			1	1	1		2			17			4
Migraine with aura				2		8	1		4	1	1	1		7	4							6							1		2				2								1						1
Pulse abnormal				9		17		4	17	2	5	3		5	7	1						8	3	1					2		2				14	11			1							1			6
Red blood cell count decreased	5	4	6	21		35		52	68		13	7	1	31	61		1				9	54	36	2			17		11		16				19	9		3				1	5			27	1		17
Multiple sclerosis	8	4	23	47	2	64	6	1	747	25	27	11	10	53	10		1		1	4	6	30	20	8	1		2		2		34				56	13			5			1	13				1		60
Vaccination site urticaria				3		3		1				1		1	4							3	1	1					2						1	2										1
Vertigo positional				1		8			1			1		8	1							6	1								2				1								2						1
Hepatitis B virus test			1	3		6			7	1	1	1		3	2							37	1	1											2	1										1			4
Nerve injury		6	9	9		142	1	9	34	10	5	5	6	51	26			1		1		10	8						17		8	1		1	15	9			3			1	17			2	2		8
Basophil count	1		1	1		3		3	7		1			2	4						1	25	2				2				1																		1
Procalcitonin			1	10		2		21	16	2				4	25					1		21	3	3			3		2						3	5						2				12			1
Walking aid user	2	1	6	7	1	130	2	2	27	2	5	4	1	55	30							19	4	1					3		3			1	5	9							5			1		1	12
Lip pruritus				2		10			2		1											5	1	1					1						2	3
Muscle contractions involuntary	3	2	20	24	1	38		17	46	21	6	3	6	16	14	1						5	19	5					23		16				27	14		1					6	1		13	2	1	5
Restless legs syndrome	1	2	3	5		17		2	17		2		2	5	3						5	8	2						3		10		1		4	2							3						3
Suicidal ideation	1		1	4		11			7	2	3	1	1	12	5							9	4	1			1		3		3				7	2							2						2
Eructation	7	9		10		22		7	21	1	9	1	1	10	10						1	11	5	2			1		8		2	4			3	5		3					1			5			7
Pulmonary function test				2		15		2	3					14	9						3	9							2							3						2	2			1
Venous thrombosis limb																						4
Cerebral thrombosis	1					1	1	1	3					1	3							8	1												1
Epstein-Barr virus test				14	1	7		3	6	1	3	2	1	5	1							30	3	4					4						8	9							1			3			7
Muscle strain	4		4	7		29		7	5		2	2	1	15	9						1	8	8						3		5				4	3			1				2						3
Subarachnoid haemorrhage	5	4		2		6		7	7		1	3		4	4						1	6	4						6		1				1	1		1								4
Hypophagia	8	2	1	75		32		123	60	3	4	2		38	33							16	36	7			2		73		3			4	40	47					1	5		2	1	73		2
Incomplete course of vaccination	5			13				6	85	80	130		4	6	12							26	2	6					3		1				27	16		1				1				3			82
Blood urea normal	13	5	4	35	2	41	2	82	65	4	24	15	2	38	48		2		1	2	20	22	40	16			6		30		27	1			42	34			1			6				44	1		10
Brain natriuretic peptide increased	2			2		5		3	5		4			8	7					1	9	6	3				1				4				2	2	1		1							4			1
Mydriasis	39	40	27	72	1	47	3	51	87	7	11	2	1	25	7	2					1	7	28	8				1	36		5	7			60	39	1	2	1		1			1		21	1		14
Vitamin D	1	1	2	5		17		4	7		2		1	7	7							8	2	3					4		4				3	3							1			4			2
Immunology test	9		3	26		11		20	37	8	4	4	4	44	24	1					7	24	11	5			2		13		6				13	20			1				48			8	1	1	6
Device connection issue				3		2			1													8													2	3
Hyperglycaemia	31	42	13	80		76		47	79	4	5	3	2	29	30							12	14	3	1		1	1	31		6	13		1	15	23		5		1			2			21
Troponin I increased		2	1			7		1	5	1	45		1	8	5						226	1	1	3					3		87				6		2												8
Tryptase	1		2	6		6		9	6		2			9	4						2	11	4	6					2		2		1		2	3										4			2
Thrombophlebitis			1	3		5			6	1				2	6							4	2						1		1	1			2	3							2						1
Vaccination site oedema	28	1	1	12		13	1	36	17			1		8	43						1	9	28	3					26		2	2			4	10									1	2
Hypothermia	49	83	31	75		38	7	96	89	2	3		2	13	30	1					1	9	34	13			2		71		2	16	1		10	25		6					2			27			2
Oral mucosal blistering			1	19		27	1	14	14	2	4	3		11	18						1	5	11	3					17		5		1		14	16		4			2			1		3			4
Pulmonary congestion	4	5		14		50	1	34	31		3	1	1	38	27			1				13	36	1			2		46		3				5	6		11								31			2
Blood urea increased	10	12	4	26		67	1	36	40	2	6	7	7	65	52						4	54	15	5			3		23		7	3			13	11		3		1	1		2			19			6
Colitis ulcerative		1		13	1	6	3		23	1	6	1	1	13	2					1	2	17	2						1		6				14	5								1		1		1	11
Deafness neurosensory	1	1	1	16		16	1	5	13	1	3	3		9	2						3	5		1					5		3				8	7							1
Lymphoedema	2	2	10	21		22	1	2	22	1	3		1	7	25		1				9	7	8	1					15		3				4	6							2			4
Skin mass	6		3	13		18		22	12		1			10	18		1				2	6	4	1			2		11		7				7	10		1				6				3			1
Vaccination site haemorrhage				4		2		12	1					1	4							10	1						2												4	4
Urinary retention	4	4	11	21		70	2	6	53	11	12	6	3	52	21		1		1	1	4	8	9	4			2		6		4				10	14				2		2		1		2		1	6
Laryngeal oedema	8	9	6	11		41	1	20	33	6		3	2	15	6	1			1			2	7	1					11		2	1	2		5	2							1			6			7
Blood pressure diastolic								1														7	1						1
Influenza B virus test	3	2		23		64		25	11	4	6	4		17	29				1		5	13	7	2			1		10		3				22	12	1					1			1	3			1
Blood chloride normal	8	3	2	37	1	34	1	70	60	2	17	4	1	18	48		2		1		14	12	29	9			8		35		23	1			29	27					2	3				45	1		6
Lipids				4		8		1	1		2	1		1	8						1	2	2						1		2				2	2
Muscle rigidity	15	5	23	65		43	5	57	65	8	12	7	4	19	22	1					1	15	46	13			2		48		4	3			86	49		6				1	1	2		36	1		4
Vaccination site discolouration				8		13		10	1		1	1		1	4							2							2		2				3	6					4	2			1				1
CSF test	2	1	1	7		29	1	24	28	10	10	23		28	7	2						6	17	3			1		15		3				11	15	1		2			4				16			6
Conjunctivitis	80	126	17	545	12	217	7	201	242	9	19	6	2	60	23	7	5	1			26	25	62	17			4		125		14	28			57	147		13	1	3	2	1	2	3	1	43		1	13
Allergy test	9	3	1	47		48	1	34	26	3	3	2	3	11	8	1					2	13	19	4		1	1		28		3	2			41	41		1			1	8		2		23		1	8
Mean cell haemoglobin concentration	3	2		4		10		8	5		3	1	1	3	14						6	17	9				1		2		4				4	2	1									1	1		4
Pregnancy test negative			1	11	1	4			8	2	6			3	1						6	3	3								8				13	18													3
Photosensitivity reaction	6	7	8	43	2	30	3	14	74	8	9	3	3	14	9	1	1	1		1	7	5	8	7					11		10	2			20	7		1	3			1	5						10
Full blood count abnormal	10		1	38		35		38	15	2	8	5		33	53					2	6	4	25	3					21		6	6			38	27										14			4
Lower respiratory tract infection	3	2	2	19		41		19	15	1	2			108	43	1				1		101	6	2			1		3		1			3	4	2										17	1
Rhabdomyolysis			9	8		19	1	1	15	7	4	4		52	36						4	19	8	3					1		12				8	4		1				1				2			9
Blood immunoglobulin M	4	4	3	138	1	20	1	20	20	1	7	23		6	8				1		5	29	18	5			4		11		8				21	45		1					10			11			10
Faeces discoloured	13	4	2	36	1	22	1	156	109	2	5	4	3	17	33					4	2	40	73	7			8		84		4	1			29	9	1	10		6	3	5		2	2	108	1	2	6
Gingival bleeding	2	1	5	35	1	21		14	18	5	1	2	1	13	7							4	6	3			1	1	13		4				13	17		2								9			3
PCO2	1			2				1						2	1							34	3	1					1																	1
Ultrasound Doppler normal			2	3		27	1		16	1	4	2	1	14	34							4	1	2					1		1				3								1			1			7
Haematemesis	6	5	3	22		28		36	32	2	10	2		11	16					3		10	25	4			2		27		3	2		1	11	12	1	6		5	1			1		23			2
International normalised ratio increased			2	6	1	30	2	7	11	1	4	3	1	26	19					1	2	17	2	2			1		2		2				4	4					1					4			3
Throat clearing				1										1	2							1							1										1
Blood bicarbonate		1		4				2	5					2								14	2	1			2		2						1	2										5
Cystitis	7	4	2	13		18	1	4	28	4	7	1		10	8	2						8	6	1			2		5		2	3			8	2		1				2				3			3
Urine analysis abnormal	23	24	20	63	1	45	2	57	133	8	11	9	2	36	56	3					1	10	27	14			5		39		8	7	2		36	31	1	3		1		3	3			32			7
Bacterial test	5	2	1	21		7		18	20		7	2		6	17			1			4	16	10	8			2		12		2	2			9	10						7				6			4
Coagulopathy	4	8	2	25	1	14	2	20	31	1	6	4		10	17	1			1			9	7	3			1		10		4	2			7	8		1		1		1	2			6			5
Leukocytosis	240	223	27	222	4	153	15	375	317	14	23	12	11	131	283	2			1	2	3	26	118	13			6	1	154		6	72	1	1	42	45		19	2	3	1	2	2	3	2	99	1		14
Nasal discomfort				7		20			4		1	1		11	3						1	3	1	3					1		2				2	3
Renal impairment	8	8	7	9		28	1	8	44		4	6		33	37							16	5	4					6		3	6			9	11		1				1	1			4			5
Vestibular neuronitis			3	2		5			6		2	2		3	2							1	3						1						3	1			1										1
Erectile dysfunction	1		3	2		10			34		12	4		5	5				2		9	4	1	2							40				6	4							4
Borrelia test			4	11		41		1	10	3	4	2		14	9						1	8	2	4					4		3				10	8			1			1							6
Antinuclear antibody negative	5	2	12	33		73		17	94	8	21	9	7	108	34		1			2	10	13	23	13			2		17		37				38	17	2		2			5	28			13			19
Colitis	3	1	4	33	1	11	1	26	46	4	5	2		14	12						2	7	11	5					17		6	1			6	5		2	1	3			7			16			7
Injection site cellulitis	3	2	21	339		421	4	109	52	5	14	5	4	104	916						25	23	169	9			1		324		28		1		213	513		3				3		4		63	2		10
Trigeminal neuralgia			2	2		17			8	1	2		3	6	5					2		2		2							1				5	3							1						1
Antinuclear antibody positive	4	1	17	22	1	47	3	7	104	7	9	5	3	30	21						4	6	12	4					8		21				27	17						2	24			6			13
Tendonitis	2		10	5		166	1	1	42	4	8	6	3	65	32						5	22	3	1					3		16		1		10	5							23						8
Tension	6		6	29		23		32	27	2	3		3	9	15						1	6	40	1					48		3				24	16		1						2		12			2
Mean cell volume normal	7	1	1	27		26	1	44	63	3	18	10	4	25	45						16	63	21	11			12		20		21	1			31	12			1			4				14	1		16
Erysipelas	1		3	3		12	1	13	4	2	1	1	2	23	136							10	18	1					21						5	1						1				1			4
Gastrointestinal haemorrhage	10	15	3	18		13		78	61	1	4	2		13	10			2		3	1	11	77				1		81		2	6		1	9	5		15		95			2	1		11			2
Hyperthyroidism	1		2	4		9			19	1	1			8	3							4	1	2							5				3	1						1	1			1			8
Incontinence	3		1	17		33		4	14	5	2	4		22	14							16	7				2		7		1	1			12	9						4				1			4
Pleurisy			1	2		23		3	6	2	5	1		12	11						4	7		2							4				1								3			12			2
Salivary hypersecretion	116	127	19	160	2	42	3	167	128	20	6	3	5	17	18	1			1		1	10	82	7			1	1	100		9	41			16	30		12		1		1				40			11
Streptococcus test	1		2	60		42	1	18	20		3	2		16	23	2					6	20	10	2					26		8				47	47						1			1	10			3
Antineutrophil cytoplasmic antibody				1		5		1	4			1		4	5							15		1					2		1				1	1							1			1			2
Arthropathy	10	11	44	99	17	78	7	15	219	13	9	7	14	49	43	3	2				6	18	12	4		1	3		15		52	1			27	9	2						43		1	5	1		14
Panic reaction	2	1	6	11		31	1	3	31	6	10	3	2	5	3						2	6	2	3	1				4		7	1			14	3							6			1		1	2
Prothrombin level						1			2	1												29		1												1
Influenza virus test	1	1	1	20		20		18	8		2	2		22	22						1	15	1	3					8		1				21	12										5			2
Shock	77	93	11	49	3	58	3	138	112	2	23	11	5	29	72	4	1	1		1		16	49	6			2	1	62		6	30	2		26	19		11		3	1			1		58			8
Limb mass			2	11		22		3	5		1	3		12	49							14	1				1		5						5	10
Pancreatitis acute			1	5		10			4	2	1			5	1							9	1												1	3													4
Dysentery	1			9		1		2	2	1	1			3	1	1						3	2	15					2		1					4						1				2
Skin laceration	1		1	8		9		4	6	3	4	1	3	7	13						2	14	1	1			1		2		2				9	7								1		3	1		1
Cardioversion			1	1		6		2	8	2	3			3	4						4	2					1		2		2				1
Herpes simplex	3	8	3	19	1	35	1	6	47	1	4	1	3	22	13				1		9	17	5	2			1		8		10	1			7	52		2					3			9			3
Diverticulitis						4			6	1	2		1	8	4							4	1								5				1														1
Scab	2	1	4	184		87		51	31	4	13	3		32	40						43	13	44	7			3	1	76		16				122	409		2				3				39			8
Immune system disorder	33	41	23	108	8	55	3	73	184	11	12	7	9	52	40	3		2		3	7	21	48	12			5	1	65		38	11	1	1	32	38	1	5		2	3	4	59	2		25	2	1	13
Imaging procedure	3		2	5		23	1	6	7		1			10	11						1	6	3	1			1		3		1				3	1		1				1				5			2
Blood iron	1		2	4		2		2	10		1			4	4						1	13	2						2		1	1			4	2													3
Gaze palsy	502	565	72	634	1	173	16	777	412	8	22	5	4	47	39	2	1	1	1	1		27	297	49			4	2	454		3	150	3	1	215	216	1	30	1	6	3	9		5	1	296	1		21
Alanine aminotransferase normal	20	5	5	39		22		81	74	2	18	7	1	18	61		1				13	18	39	10			7		28		20	1			35	21		1	1			3				42	1		15
Facial discomfort																						4
Myocardial necrosis marker	1					2									5						1	5	2
Scan with contrast abnormal	2	1		2		6		8	5			1		9	4						2	6		1			1		1		1				2	1										3
Posture abnormal	20	6	10	91	1	106	3	102	100	2	20	8	1	26	21	1		1				22	72	16			7		82		3	3			135	69		3				5		1	2	61		1	8
Atrial flutter			3	1		12			3	1	3			3	1						2	2							1						4	1
Human chorionic gonadotropin				2		1				1	1			1	1						2	11									1				2	2
Mechanical ventilation	13	5	2	36	1	102	2	64	34	8	2	8	6	97	44	1	1		2		2	17	21	8			6		27		2	1			20	21		1	1			2		1		52			9
Nerve conduction studies			4	10		122	1		5	7	2	1	7	18	13						1	4	2						6		5				11	2			1				1						5
Pleuritic pain			2	1		10		1	3	1	8		1	7	5						25	5		2							7				1	2
Retinal vein occlusion				1					2													1		1											1								2						1
Electrophoresis protein			1	2		10			5		1	1		7	2							14		2					1		1				4								1						2
Red cell distribution width	1		1	6		3		7	3		2			1	7						1	17	3	1											5	2										1
Blood alkaline phosphatase normal		3	3	21	1	25	1	12	39	2	17	8	2	9	32					1	14	5	15	5			1		11		21	1			33	17	1		1							16			15
Blood creatine phosphokinase MB	1	1	3			10		10	5	1	10		1	3	10						41	5	12	1					4		17				2				1										2
Optic neuritis	9	6	17	33	4	69	3	4	256	17	17	8	3	59	6	2	3			4	1	18	13	10			1		7		10				42	13	2		2			2	5			1			34
Face injury			3	11	1	28	2	1	11		8	3		7	9							3	6	10					4		4				35	17						1
Nephrolithiasis	1		2	1		9		2	9	1	1			8	4						1	38	2	1					2		4				4			1					6			2	1
Respiratory viral panel				25		2		22	7	1				9	9							3	5						8		1				14	26										1			1
Stool analysis	1	2	1	13		5		39	15		5	2		8	7					1		10	11	2			1		18		1	1			8	6		2	1			2				20			5
Viral infection	56	59	42	1070	4	241	9	450	360	24	32	25	13	134	89	12	4	7	4	1	51	83	358	31	2	2	6	1	427		36	17	1	1	167	2742	3	104	2	7	7	4	19	18	7	408	3	4	50
Glomerular filtration rate decreased			2			10			5		4	2		11	12					1	1	3	5	1							1				3				1										3
Anal incontinence				7		11	1	3	10	3	1			7	6							23	2	2					2		1			1	4	3													3
Influenza A virus test negative	3	2		20		81		24	11	4	5	3		19	33						4	11	9	3			1		9		3				20	12	1					1				7			1
Surgery	6	8	2	31	1	57	2	199	106	5	8	2	3	37	79	2					5	18	91	5	1		7	1	105		11	2			20	14		7			3	4	6	2	1	180		1	11
Blood bilirubin increased	5		8	12	1	34	2	23	116		17	19	4	23	44					1	5	17	23	12			9		9		11				71	10			1		1	3	1	1		17			64
Musculoskeletal disorder	2	1	5	13		93		6	21	4	6	1	3	38	84							18	2						10		7				10	6							1			2	1		5
Drug hypersensitivity	1		7	28		47	2	10	28	1	3	3	10	37	64					1	4	122	10	3			1		19		5				20	26		1	2			2	1		1	11		1	9
Mastitis			2	2		7			6						3							1	1												2	1										2
Dysaesthesia	6		4	10		21	1	2	37	7	2	6		22	7							8	7	1					2		2				4	1			3			1	2						14
Platelet count increased	16	13	4	63	2	31		143	111		7	5		26	55				1	1		33	86	15			20		95		2				29	38		10	2	1	1		1	4		113			16
pH body fluid	1			1				3	3													21	1	2					1																	6			1
Neck mass	1			11		16		1	4		2				4						2	3	2						1		2				2	5										2			2
Ataxia	5	3	6	91		81	1	21	67	13	8	9	3	58	26	1			1	1	1	17	21	6					37		6	1	1		50	72		2	1			1	2			13			17
Differential white blood cell count normal	4	2	1	40		22		25	20	4	9	5	1	11	13						8	3	13	5			2		18		12				23	29		1					1		1	15			7
Fear of injection				4		7			4			1		1	2							5	1												2	1
Lip oedema	1	5		6		25	1	1	7	1	1			10	3							3	3	2					8						6	9										1
Red blood cell count normal	38	10	3	60		28		124	84	4	14	6	3	23	70	1	3		1		15	19	73	14			6		30		22	1			34	30	2	1	1			4				50	1		12
Treponema test			1	5		5		2	3	2		1		7	1						1	19	3	3											4	3										1			2
Wrong technique in product usage process	1		1	10		100		12	9	13	12	2		27	15					6		51	6	2					4		1				9	8										2			1
Blood alkaline phosphatase increased	10	6	10	47	1	37	3	59	183	5	16	6	3	44	49		4		1	2	2	52	36	9			3		29		3	2			68	19		1	2			3	3			26			35
Body temperature fluctuation	2	1		18		15		10	9	2	3	1		7	16						1	3	8	5					6		1			1	5	7		1						1		11			1
Carbon dioxide normal	2			15		24		25	11	2	9	5		9	23						12	3	12	2					12		15				18	16										6	1		7
Micturition urgency	1		1	4	1	12		1	39	3	1	1	2	9	16							6	1	1			5		1		4				3	3							3						1
Ventricular tachycardia			1	1		13		2	8		2			11	6						7	4	1				1		1		5				1	4										2			3
Hemiparaesthesia									2					2								1
Lip pain				4		14			3		2			10	3							2	3						4				1		1	5		2										1
Pancreatitis	4	3	2	24	1	29	1	1	39	2	4	1		8	6				2		1	14	3				2	1	3		2				7	3							2		1	1		1	5
Blood magnesium normal	3	1	2	10		22	1	19	14	3	7	1	1	6	9						8	3	16	6					11		12				7	7			1				1			10			4
Uveitis	8	2		9		5		1	104	2	10	5	3	21	8	1					2	9	3	1							5			1	12	10							1			2			6
Autopsy	18	19	1	49	2	33	3	159	69	13	2	3		51	52		1		1		1	24	49	13			8		53		1	1		1	23	30		2	2		2	8		1		105			3
Blood uric acid				4		5		4	3		1				8				1	1		14	6						1						3	2		1	1							1
Encephalitis	70	75	38	274	2	136	11	145	260	48	35	43	10	108	49	16	5		4	4	22	20	100	24		1	6	9	113		16	17	5		76	106	3	12	5	1		3	1	3		60	1		31
Injection site vesicles	8	2	39	403	1	347	6	133	87	4	24	14	5	42	166	1		1	1		107	28	222	13			2		383		36	2			238	723		25				4		3		101	1		10
Mood swings		1	6	14		6		3	16	6	7	2	1	3	3	3					4	11	7	1			1		7		29				10	5							12			2			1
Incoherent	1		4	11		28		1	15	2	3	4		12	9					1	1	8	6	1					5					1	15	14							2						1
Vaccination site lymphadenopathy														1								2
Choking	8	3	6	39		53	1	90	51	6	6	2	1	27	26	1					1	10	53	9			2		69		1	2	2	1	19	24		12					2	2	2	66			3
Ultrasound scan vagina						2				1		1		1								1									1				1
Neutrophil count increased	4	4	3	25		52	2	50	40	3	7	1	3	27	150					1	5	62	30	10			8		21		9	1			22	17		1				4				32		1	10
Abnormal behaviour	61	47	12	908	1	141	11	486	267	9	16	7	3	90	77	6	1	3			3	61	237	38			4	1	440		9	24		2	191	287		32	1		1	4	6	4	8	222		6	8
Eyelid oedema	12	5	20	215	1	304	3	83	101	16	19	10	2	64	31	1		1			11	10	129	9					145		12		3	1	92	155		3	1					3	1	59	2		13
Hypokalaemia	2	2	16	18		29	3	6	27	1	7	5	2	13	27						1	11	7	2					5		2	1			9	5		1	1				4			7			4
Diarrhoea haemorrhagic	4	7	1	23	2	13	5	90	56	6	12	5	2	17	14	1		1		2	5	9	42	6	1				47		7	4		1	11	5	2	7		9	1	1			1	65	1	1	7
Red cell distribution width normal	3	2	1	22		14		31	13	4	11	6		9	30						17	8	14	3					10		25	1			13	9						1				7			7
Trismus	4	2	6	27		23	3	12	12	4	2	1	12	8	7						1	5	13	3			3		18		2				7	6							1			5	1		3
Aspartate aminotransferase normal	16	2	2	44	1	24		74	75	2	17	8	2	20	53		1				13	10	42	11			8		25		16	1			37	23					1	4				46	1		19
Euphoric mood	1	1		2	2	5	1	1	18	1	1			1								4	1						2		2		1		5	1
Blood calcium normal	3	5	3	38	1	28	1	50	45	5	17	9	1	25	28		1			1	14	11	34	6			1		32		26	1			31	22			1		1	2	1			48	1		12
Cheilitis	2			22		29		17	18	2	7	1		6	7		1		1			6	17	2					15						9	15								1	1	10
Herpes virus infection	2	1		11		14	2	9	11	1	2	1		7	6						1	10	4						6					1	8	14		2								3			1
Transfusion	1	2	1	21		19		31	18	2	2	1	2	18	18					2		7	10	9			2		14		1				9	15		3				2			1	20			1
Blood culture negative	21	6	14	165	1	177	1	274	184	7	27	13	3	76	291			1		2	15	38	103	31			34		138		14	3			93	110		16				5		2	2	231	1	1	14
Blood pressure systolic increased						7			1					6	4							6																											2
Mean cell haemoglobin concentration normal	12	3	1	25		21	1	48	56	3	11	5	2	18	33		3		1		14	12	22	6			10		18		20	1			25	16	2		1			4				8			12
SARS-CoV-2 antibody test positive																						6
Myositis	12	5	18	26	1	75	1	19	76	3	8	2	8	41	59					1	3	10	15	7			1		14		10	1	1	1	22	13		2	1			1	4			8			13
Premenstrual syndrome									1													3
Venous thrombosis						3		1	2	1	1			2	3							2							1																	1
Blood bilirubin normal	2	1	3	23		23		39	35		14	7	1	25	39		2		1	1	10	8	19	3			2		13		18				23	18			1			2			1	25	1		13
Cluster headache	1		1	1		6		1	1		1	1		1	1	1					1	1	1						1		2												1
Injury	38	72	143	225	4	63	12	65	167	23	15	4	20	34	31	1	1	1	1	1	15	16	58	14			2	2	98		19	7			57	49		12		3			18			25	1	1	6
Systemic lupus erythematosus	1	3	10	21	1	22	2	1	208		5	3	5	62	20					1	5	50	2	7					3		10				10	9			1				11			2		1	20
Hyperthermia	8	5	3	24		11	1	46	25	1	1	4	1	5	75	1	1		1			22	31	5			1		26		1				4	9						8			2	36			3
Hypothyroidism	3		4	18	1	18	1	6	51	3	11	3	3	14	12	1				1	2	21	5	4			3		5		32	2			10	2			3			1	6			1			5
Ear congestion				3		17		1	4	2	3	1		8	5							3							3		1				2	2										2			1
Mental disorder	2		4	23	1	12	1	7	24	3	11	1	2	10	13					3	4	12	8	3			1		7		8				13	5			2				2	1		3			4
Mental fatigue														2	2							1													1														3
Inflammatory marker test	3			6		5		7	4	1	4	1	1	6	3		1					7	3	2			2		3						7	3													2
Joint injury			2	5		24			9		3	1	2	24	11						2	11	2	1					4		4				5	7							4						5
Myelitis transverse	4	4	11	22	1	151	3	17	50	8	16	4	4	56	18						1	13	17	4					18		4	1			37	19		3	1			2	2			14	1		12
Blindness transient			1	3		13			16	4	3		1	12	2							4	1	3					2		2				10	3										2			2
Costochondritis	1		1	3		5		1	2		1			5	1						3	3									3					2							2
Body temperature abnormal				5		2							1	3								11	1	1					2
Emotional disorder	6	4	5	57		10		26	23	2	3	1	2	8	9	1					1	9	19	3					29			1			7	16		1				1				7			1
Gastritis	4	7	2	23		21	2	14	38	7	9	4	1	13	12	1				5	6	3	15	6					13		27	1	1		11	12		3		2			5			14	1		7
Thyroid function test normal		2	2	9		26	1	2	26	3	8	5	1	30	6						1	5	6	1			1		6		12				17	6							2			1			3
International normalised ratio normal	5	3	1	16		18		24	19		5	1	1	14	9		1			1	6	8	18	1			3		9		8	1			15	10			1			2	1			5			7
Cardiac function test			2	2		9		1			1	1		8	4						1	4	1								1				3	1													1
Dermatitis bullous	132	292	77	914	4	108	23	329	369	19	20	7	15	49	48	7	1	7		2	25	34	142	15					359		21	58	3	1	55	4666	1	37		4		1	8	9		102	1		4
Nystagmus	18	21	6	32		36	2	41	101	12	8	5	3	16	6	3	1		2			7	38	10				1	35		1	7	1		16	22		7	2	1	1	1	2		1	21			13
Pneumonitis	1	2	1	11		7		11	9		1	1		10	7						3	9	12				1		12		2				2	11		4								13			3
Blood phosphorus	2		1	4		4		2	4		1			3	4						1	9	2						3						4	2										4
Frequent bowel movements	3	1	1	13		17		40	28	2	3	1	1	16	15						3	13	18	3					23		6	1			5	1		1			1	3		2	2	25		1
Jaundice	10	11	12	36	1	32	6	25	340	3	34	25	4	21	33	1				1	2	22	23	10			9		17			6			174	17	1	2				2	2			16	1		62
Post-acute COVID-19 syndrome																						5
Protein total normal	7	2	2	25	2	23		27	40		15	5		20	38		1			1	13	7	16	4			4		10		18	1			24	17			1			1				19	1		7
Blood creatine phosphokinase normal	10	2	8	16	1	52	3	36	53	1	26	9	3	40	44		1				33	6	19	8			3		9		24		1		30	12			1			2				16	1		9
Lip blister				8		21		4	7					10	8							4	1	1					4						4	5					1					6			1
Phlebitis	4	3		2		9			15	1	4			3	23							4					1				1				2	4							1						2
Blood thyroid stimulating hormone decreased	1			7		13		5	17		7	1	1	8	8						3	8	5	2			1		3		14				7	5										2			6
Blood folate				2		4		2	3					3	2							5	1						1		2				4								2
Injection site irritation			6	22		107	5	13	20		5	11	2	11	81						9	5	14	4					27		20				26	71		1				3		1		5			9
Inflammatory marker increased	7	1		15		9	1	19	12	3	3	1		23	30					1		12	9	7			2		7						4	4						1				3			4
Sinus rhythm						4	1							1	3						2	22																											2
Electroencephalogram normal	26	8	8	196	2	103	4	321	174	15	9	12	2	41	38	3	1		2		2	28	158	36			1		210		5		1	1	99	112	2	12	6		2	7	2	1	3	258			24
Skin abrasion				5		4		6	5	2	4			2	8						1	3	3	1					2		2				12	6					1	1							1
Coma	72	69	52	265	2	96	8	334	221	17	17	11	10	56	44	8		8	1	2	9	18	335	12		1		1	421		8	24	4		37	100	2	86	3	2		3		6	1	290			12
Ear pruritus			1	5		4		1	1					1	6							3	1						1						2	3													2
Pulmonary infarction						1			1	1					3						1	9
Shoulder injury related to vaccine administration			3	1		9	1		2		1			28	17						1	8	1						1						1	2													1
Testicular pain			2	14		4	1		1			1		6	3				1		1	1		3					1		1					2										1
Osteoarthritis	59	61	58	264	71	86	3	50	366	18	11	4	11	60	71		4				6	25	11	1		2		2	20	1	33	6	3		22	22							51			2			4
Quality of life decreased	2		2	21		20		2	10	3	3	2	2	12	7						1	3	2	5					13		1				6	1							2			8			2
Gingival swelling	2		1	7		14		4	3	1	4	2	1	2	3							2	2	1							1				6	6													2
Blood cholesterol increased	3	1	6	4		15	2	1	32	2	24	8	2	23	14						26	9	4	4			1		1		72				13	1							5			1			8
Monocyte percentage	16	3	2	26	1	23		60	39	1	8	4		13	33		1				6	18	30	10			5		14		11				16	8						6				30	1		8
Computerised tomogram thorax normal				2	1	8		1	14		5	3		24	12						5	4		2			1				4				6	1													4
Pulse absent	3	3	1	15		31		26	23		2			4	8						1	6	16	1			1		18						13	10		2								24			2
Tonsillar hypertrophy	6	2	1	34		9		11	11	3	3	2		7	53					2		13	13	7					11		4				13	14	1									7	2		1
Embolism						5			2		1				1						1	4	1						1																				1
Pityriasis rosea	1		1	8		6		5	10	2	1			12	1						4	4	2						1		2		1		3	7										1			2
Encephalopathy	97	72	9	145	1	61	6	159	128	6	11	11	6	38	23	6	3		3	1	5	19	79	6			3	1	116		4	24		4	23	54	2	9		1		8	10			65			10
Impaired quality of life				2				3	1					1								1		3					3
Irritable bowel syndrome	6	1	2	13		7		3	27	3	13	2	3	11	5					2	3	18	8	5	1		1		4		25				10	7	1						3			3	1	1	8
Liver function test increased			1	3		1		4	6		4	3		3	9							80					1		1						2	1						1				2			3
Mood altered	12	3	2	45		15	1	165	87	4	4	2	1	19	18		3		2		2	13	15	2			7		30		12				21	23		2				25	4	1	3	64			1
Orthostatic hypotension		2	7	5		12		1	19		14	6	1	6	6						4	2	3	3					1		4		3		6	2			1										5
Atelectasis	23	26	2	9	1	34	1	45	37		1	1	1	11	17	1			1		4	6	13				1		23		2	5			3	2		3					1	2		24			3
Crohn's disease	1	2		12	1	5	1		36	1	6	1	1	5	3					1		34		5							6				10	5							3			1			8
Culture	3		1	48	1	53		41	24	3	6	4		14	46				1		11	10	14	1			2		31		5	2		1	35	59		2				3				27			2
Multiple sclerosis relapse	1		2	2		3			27	1	1	1		11	5							25							1						4	5													5
Thyroxine free				5		6		1	3	1	1			2	1							6	2				1		3		3				5	3										2
Blood creatine				1	1	3			2			1			3						1	11	1												1											1
Eosinophil percentage	12	5	5	27		15		46	33	5	10	2		11	24						8	18	24	6			3		13		13	1			17	8	2					3				17			8
Catheterisation cardiac normal						8			1		4			2	5						16	1									8
Dementia	30	25	2	12	2	14	1	25	10	1		1	2	16	10		1					6	4	1					13			2				2			1	1			2			2			1
Motion sickness				5		3		1	3	1		1		3	2							2		1					1		3				2	1
Protein urine	2			4		3	1	3	1					7	3				1	1		14	5	2			1		1			1			4	3											1		2
Rheumatoid factor negative	2		7	25	2	59		5	52	2	11	10	4	54	17		1			1	8	9	7	2			1		7		33				24	11		1				1	21			1			18
Drooling	4	5	4	122		53	1	84	44	7	9	4	2	17	14	2		1			3	5	66	7					86		2				48	78		9			2			3	1	62			2
Temperature intolerance				7		9			7	5	3	2		10	7							9	2	1			1		5		3				7	3							5
Blood albumin normal	4	4	2	20		18		26	21	1	17	4		20	30		1			1	14	5	13	2			2		13		20	1			25	19						2				12	1		10
Lung infiltration	2		1	13		15		8	4	2				24	31		1					10	7	2			3		7						5	7		2						1		12			2
Pneumonia aspiration		1	1	17	1	8		13	3	1			1	10	23				1			14	6				1		7			2			1	8							1			13			2
Anger	3	2	5	39		17	4	16	17	10	6		1	19	8	1					6	13	17	5			1		31		22	1			19	13							2			4			9
Apathy	90	14	3	114	1	10	2	145	73	3	7	2	4	3	8	2				1	1	21	109	12			1	2	78		1	4	1		12	9		1	2	1	2	2			5	45			8
Mean cell haemoglobin normal	6	3		22		23		39	47	3	15	6	3	20	34		1				15	53	16	4			13		10		19	1			19	8			1			3				11	2		12
Cardiomyopathy	5	6	3	9		18	1	14	32	1	15	1		16	11		1		2	1	30	12	25	9	1	1			12		15	2			5	8	1	4	1				2			9			4
Supraventricular extrasystoles			1			3			5	1	1			5	4						4	1		1			1				3				1
Acute coronary syndrome						2			1					2	1						1	16									2
Interstitial lung disease	2		1	6	1	8		12	13	1		2		14	59	1			1			17	6				2		1		1			1	2	3						2				3
Medication error	10	3	152	219	2	953	7	254	225	17	40	23	50	58	171	1	1		1		25	37	239	16			4		339		23	3	3		166	207		37			3		23	20	2	238			38
Upper respiratory tract infection	25	17	13	277		201	2	313	150	4	14	8	3	102	152	1	2	2	1	1	33	111	191	26			1		182		34	9		1	104	187	4	30			2	3	10	7	1	178		1	14
Visual acuity reduced	3	1	7	20		52	1	9	138	12	20	8	2	49	16					1	4	14	10	12					11		22	1	1	1	31	12	1				1		10			4			14
Spinal X-ray						17			6		2			7	7						1	4	1				1		1		4				5	5			2				5						2
Ventricular fibrillation	1	1	2			11		2	4	1	2			5	2						2	3	1						1							1										1			1
Mean platelet volume	1			1		3		2	1					1	2							10	1						1									1								1			1
Tongue oedema	27	31	53	40	2	140	3	27	138	16	22	18	5	40	27	3			1	2	2	11	19	7			1		23		11	6	2		32	13		3					4	1		10			9
Adnexa uteri pain				1		1																3
Needle issue				10		44		3	9	6	5			6	11							7	1						3						15	10													2
Accidental overdose		1	6	13		90		5	58	1	3	5	1	1	4							1	16						43			1			63	18		1								23			7
Concussion			3	6		14		2	5		1	1	1	8	6						1	10	4	5					4		3				15	9					1	2			1	1		1	2
Lymphocyte percentage	17	5	3	27		10	1	55	38	3	8	3	1	7	39				1		11	22	36	7			5		25		16				21	14						2				27	1	1	10
Vitamin B12 normal	3		4	6		31		2	21	2	8	4	2	32	13						8	7	3	4			1		1		10				11	2							1			1			2
Cardiac telemetry				2		1				1	1			1							1	1							1		1					1										1
Dysphoria		1		1		3		10	2					2	6								3						1						3
Ecchymosis	184	206	129	334	4	257	14	224	300	8	13	6	16	50	108	1	2	2			4	13	98	8			1		195		28	45	1		46	102		15				2	6	2	2	42			1
Computerised tomogram pelvis						9		1	4		3	1		7	5					1		10	1						1		1				5	1	1												2
Septic shock	3	2	2	10		14	1	12	13		3	3	1	19	25	6			1			7	7	5			2		5		1				3	7	1							1		13			1
Thrombectomy															1							6
Angiogram cerebral						3								1								5
Body height						1		7	4													3	3						5																	10
Middle insomnia	5	1	4	53		95	1	38	24	3	8	4	3	57	44						4	15	13	5					27		7			1	12	21		1		1	1	2		2		6			3
Pregnancy				7		3			7		2	1	1	3	1						4	3	1						1		4				2	6							1						2
Seasonal allergy	2	1	4	26	1	5	2	8	15	2	6	2	5	17	3					1		32	15	3			2		12		2				3	4			6		1	2				3	2		6
Thyroxine			1	4		3			4					4	1						1	3	1	1					4		2				8	3							1			1
Vaccine breakthrough infection	3	1		62		3		1	4	1				3	1							2														5										1
Acoustic stimulation tests normal	3	2	1	12		6		7	18	1					3			1				6	5				3		7						2	10							1			6
Hallucination, visual	2		2	12		20		1	12	5	5	4		10	6							8	10						5						13	7			1				1						1
Hunger				3		5				2	1		2	2	1							5	2						3						2	5
Magnetic resonance imaging spinal abnormal	1			2		2		1	5	5	1			8								11													1	1
Muscle swelling	1		3	2		19	1	1	1		2	2	2	12	50							5	2	3					6		1				4	6						1	2				1		3
Internal haemorrhage						1								1	1							1
Scar	1	2	4	22		36	2	15	29	1	1	1	3	22	14						9	12	8	3	1		2		8		5	1			12	43	1	1			2	4			1	6			6
Systemic inflammatory response syndrome	1			5		14		5	1	1	1			5	55						1	11	4	1					3		1				3	5										1			4
Amylase				2		2		1	4		2	1		2	2							9													2	1										1			1
Antiphospholipid antibodies						5	1	1	2					5	2							16	1						2						1	1										1
Vasodilatation	1543	2139	1957	1848	10	1551	241	1176	1864	105	116	35	243	361	1244	22	10	4		3		31	175	38	4	1	1		1165		114	389	18		102	410		32		3			22			5			1
Scratch	3			47		23	1	68	13		1	1		8	6						3	23	15	1					24		2	1			31	38	1				6	7				5			2
Stridor	13	17	2	64		38	5	65	32	1	3	1		12	13				2		1	10	31	4					47		2	4			18	47		1		2					1	26	1		3
Anion gap	1			5		4		12	2	2	3			4	13						3	7	3	3					6		2			1	4	2										2
Liver function test normal	5	4	9	31	1	41		38	72	9	26	29	4	47	34	1	1		2		8	9	27	11			2		24		18		1		46	22	3						2	1	1	20			18
Eye discharge	4	7	3	63		341	1	41	28	3	6	2		75	12			1			12	9	21	2	1		3		35		4	1			18	44		1						2		30		1	1
Eye inflammation			3	16		22		7	13	2	6	4		11	7						3	5	2	1					5		2				6	10		1			1	1	3			4			4
Neutrophil percentage	7	1	2	15		10		45	30	4	8	3		10	48				1		12	27	15	4			3		16		15				16	11					1	2				20			6
Brain natriuretic peptide normal	1					1			2		3			1	2						6	4	1	2							5					1
Haemorrhagic stroke						3			1					1								18							1						1							1
Lymphocyte count decreased		1	2	24		26		14	25	2	8	3	3	15	31						4	7	8	4			3		8		5				17	19							1			11	1		13
Nerve compression			1	3		12			5		2	2		9	4						2	6	1								2		1	1	4	2							2						2
Blood glucose abnormal			1	8		14		1	4	1		1	1	10	5							6		1					3		1				7	4			1		1					2			2
Catheterisation cardiac abnormal						4		1	2		1			2	3						8	3		1			1				6				2	2										1
Livedo reticularis	19		1	42		34	1	64	37	3	4	4		16	18							17	57	6			4		51		3	1			10	22		8			1			1		52
COVID-19 immunisation														1	1							10
Neutrophil percentage increased	12	3	3	26	1	63	1	34	30	6	8	7	2	31	142				1		9	15	32	12			2		16		11				22	20	1		2			2	1			12			8
Renal disorder	2	5	6	7		12	1	14	23	2	4	3	2	17	12						2	6	8	4	1		2		8		5				8	7		1				1	1			8		1	5
Vaccination site paraesthesia						1			1						1
Anti-thyroid antibody			1	7		1			11		2			1	1							2	2	1					2		3				1	3							1						3
Eyelid function disorder	1	1	1	10		45		4	6	4	1	2		17	4						1	6	5	1					5		2				4	5			1			1				1			4
Lyme disease			2	2		11		1	1	1	2	3	3	2	3							3	1	1					2		3				8	5							30			2
Pulmonary mass				1		3			3		1	1		9	7							6					1				1				3	2										1
Coronary artery disease		2	4	3		20		7	9	1	1	2	2	16	23						15	5	4	1					3		6	2			4	2							3			6			1
Myasthenia gravis			1	1		11		1	5	1		2	1	5	4							2	1						1		1				5	2	1												3
Papule	2		2	163		42	1	56	34	3	15	3	2	21	20	1					51	24	24	2			6		39		21	1	1		92	191		1			1	3				10			4
Cardiac failure acute			1			1		2	1					5	5																															4
Blood lactate dehydrogenase increased	26	16	9	50	1	31	5	104	154	4	12	9	1	46	77	2	3		2		6	25	38	18			5		19		5	4	1		28	20	2	1	1			7	2		1	45			30
Cardiolipin antibody						1		1	2	1				4								10	1						1		1				1								1			1			1
Circumstance or information capable of leading to medication error				27		18		2	9	2	1	1		3	4							9	3				1		10						15	21
Abnormal faeces	14	13	3	46	1	15		102	78	1	6	2	1	5	15	1						14	47	7			1	1	64		2	2			15	12		7		21	1	5	1	1	1	54		1	1
Basedow's disease		1	2	2		2	1		7	1	1			2	2						3		1						1		5				4	3										3			7
Monoparesis	25	3	1	5		8	1	25	28	4	2	1	1	11	7							7	16						5						3	2						1		2		6			7
Polyarthritis	1	1		18	1	15	1	3	64	3	6	5	6	15	15						1	13	2	2			1		4		8				17	5							31		1	1			7
Cardiac stress test normal			2	1		19		1	1		5	2			5					1	13	7	1						1		14				2	1	1						1						3
Foetal death				7		11			1					22								10	1						2
Mastication disorder			1	8		14		1	4	1	1	1		4	5							7	2						1						1	1						1				1			2
Lip dry		2	2	5		10		6	7	1				7	7	1					1	5	1						4		3				4	5							1			2
Localised oedema	6	1	6	12		20	1	15	14	2	4	4		17	47						1	4	14	6					12		6	1			12	12										5			2
Lymphocyte percentage decreased	7	3	2	23	1	43	1	38	27	5	10	7	1	23	92				1		8	20	22	9			5		17		9				20	19		1	3			1	1			19			10
Scan with contrast normal				2		6		2	6		2	1	1	4	4						2	2	1	2					1		2				6	8													2
Rotator cuff syndrome			3	1		143	1	1	10		3	1	5	73	48						2	28	1						3		11			1		2							11						1
Bradyphrenia			1	3		8	1		7	4	4	3		1	3					2	1	5	2	1					2		2				3	1													1
Brain oedema	30	34	2	58		22	3	81	49	5	5	3	2	25	16	1	2		1		1	17	34	4			1	1	45		1	10	1		6	19		12	3		2	1	1	1		41			9
Leukopenia	43	49	19	168	3	24	6	84	145	8	18	7	2	27	24	5	1				3	15	29	9			2	1	38		4	12	1		28	45		9		10	1		5		1	19			17
Polyneuropathy		1	8	8	1	56		2	51	14	12	5	2	38	14					3	1	9	14	5					3		3				21	2			3				9			1	1		20
Road traffic accident	1			4		15			7	1	2	3	2	12	13						2	5	4	1					1		1	1			6	3							3			1			1
Vomiting projectile	7	5	2	52		38		119	82	2	1	1		20	21							12	57	7			1		95		1	1			19	22		8			1	1		3	1	79
Genital herpes				2		1			3	1				2	2						1	1									1					1
X-ray abnormal	7	4	3	19		51	2	93	62		2		3	26	53						1	9	42	6			1		46		14	2			8	7		3			2	4	19			57			3
Blood thyroid stimulating hormone increased	2			4		6		4	14	1	3	1		11							1	4	2	1			1		6		5				6											3			5
Gastric disorder	2		2	11		15		7	12	1	4	2	1	6	9						2	6	4				2		5		6				6	3						1	1			2			3
Gynaecological examination				1		1																2	1												1	2
Basophil percentage	3		2	18		13		20	18	3	7	1		7	14						7	13	8	5			1		9		13	1			10	2						3				12			6
Bed rest	1	1	2	2		26		1	5	1	3		1	23	24						2	5	3	2					2		5			1	6	5										2		1	3
Multiple organ dysfunction syndrome		1		10		1		3	5		1	3		9	9							17	2	2			1		4						2	5										2			2
Injection site oedema	2143	2558	2922	4337	10	2623	310	2446	2082	137	217	110	360	484	3690	24	7	12	4	11	100	99	3618	85	3	1	6	2	5935		619	574	17	1	817	1187		271		5	6	3	38	49	1	734	1	2	35
Oral disorder	2		1	16		17		7	8	1	3	1	1	11	5						7	6	5	3					4		6				6	14										4			3
Status epilepticus	11	3	2	80		19		59	22	2		2		17	11	1	1				1	21	28	15			1		55			2			23	41		7	1			2			2	48			1
Tendon pain	1					13			14		2	1	1	10	4							5	1	2					1		2				5								1						3
Pharyngeal erythema	33	2		87		43		70	27	2	7	3	2	26	72	1	1		1		1	6	55	15			1		31		3				27	31	1	1			1	4		1		47			5
Raynaud's phenomenon		1	7	7		12	3	1	33	1	2	2	1	4	5	1					2	13	6	1			1		2		3			1	7	3			1				12						3
Bowel movement irregularity				6		9		22	13	1	3			7	7						1	4	10	1					15						5	6		2						1		24
CSF protein increased	3	1	11	33	2	177	1	32	53	17	24	31	4	126	46					1	6	18	24	9			1		19		7				35	24	1	2	1			2			1	20			27
Fine motor skill dysfunction			1	6		9		3	5	1	3			3	5							3	1						5						2	3													2
Wound	1	1	2	12		15	3	41	14	4				15	19		1				2	13	9				2		9		2				11	13	1				4	5				4
Biopsy bone marrow			1	7		8		5	5	1		1		3	4							3							3						5	5			1							6			1
Complement factor C3	7	6	2	13		15		16	22	5	5		2	35	17	1	1			1	6	14	14	5			4		10		12				7	6	2		1			2				3			3
Initial insomnia			1	2		7		2	5		2			5	7						1	4							7		1				2	1								1		1
Retinal artery occlusion						1			3	4	1			1	1							2		2											3		2
Troponin I normal				1		4			2	1	9			1	3						23	2	1								13				2	2	1												1
Blood calcium decreased	2	1	3	14		18		15	11	2	3			6	25						4	8	13	4			1		11		7	1			6	5		1					1			8			6
Cardiogenic shock	1	2		1		4		3	1					2	2							30	1						1						1							1		1		5			1
Postural orthostatic tachycardia syndrome				5		7			3		3			5	4						1	12	2	4							4				7	2													1
Mean platelet volume normal	7			13		9		36	11	2	9	3		7	21		1				10	10	13	3			3		6		11				8	8						2				5			9
Neuralgic amyotrophy	8		3	3		50		1	19	1	5		3	26	13						3	6	2								3			1	8	1			3										5
Myelitis	13	15	26	28	1	90	1	23	135	12	17	11	12	53	6	2			1	3	1	9	19	1					11		2	1		1	33	13			2				3			3		1	23
Varicose vein		1	2	1		1			6					1	5							2									3															1			3
Anti-cyclic citrullinated peptide antibody						4			1						2							3
Dermatitis contact	5	8	2	29		14	1	24	29	1	4	4		7	10						15	14	16	3			1		22		18	2			17	34		2				2	3			8			5
Aggression	10	11	2	247	1	39	1	63	67	4	8	4	2	24	21	3		1			5	18	47	5			2		109		12	6			49	60		3	1		1			1		27			2
CSF protein	1	2		9		11		10	35	7	6	9		16	3	1				1		7	6	3			15		6				1		9	3	2	1	1							2			2
Food allergy	5		4	78	1	42	2	47	38	7	2	4	1	33	19	1				1	2	27	27	5			4		42		5		1		21	42		1				3	1	1	2	12			2
Borrelia test negative	4		9	34		77		3	46	12	20	17	1	42	16					1	2	6	12	11			1		12		10		1		30	10	1		5			2							26
Endoscopy upper gastrointestinal tract			1			1		4	4	3	1			3	3					1		8	4	2					2						3														4
Muscle discomfort						1								3	1							3
Bradykinesia				2				1							1							5																					1
Haematology test		3		15		7		4	4		1		1	1	6						1	3	3	5					5		1				2	5		2								3		1
Vaginal discharge		1	1	3		4			1		1	2			1						1	8		1							1				3	4													1
Blood albumin decreased	3	2	1	18	2	23		48	37		9	5		27	26		1		1	2	3	17	22	4			5		13		6	1			16	9		1	1		2	3				15			9
Cardiac imaging procedure abnormal									1	1	2			3	1						1	1									1
Complement factor C4	3	5	2	11		13		10	17	4	4	2	1	24	9	1				1	5	12	8	3			3		9		13				9	5	2		1							4			3
Pharyngitis	440	550	172	1113	55	565	38	615	802	33	40	24	24	284	124	25	7	2	6	5	37	49	175	35	1		7	3	319	5	75	91	6	1	97	404		26	4	5	1	2	22	3	2	116	1		15
Slow speech			1	3		7			3	1	1	1		2	5							2	3	2					2						7	1
Ultrasound breast																						3													1
Chapped lips	2			7		14		13	11	1	2	1		8	5	1						6	4	2					5						5	8										7			1
Dysphemia	3	1	2	39		18	2	4	20	1	1	2	2	17	3						1	19	19				2		31		3		1		26	17	1	1					2			1			2
Hormone level abnormal	2	2			1	1		1	10	1		1										3							1		1	1			2	2		1					1
NIH stroke scale																						7
Tongue discolouration	6	6	3	18		18		14	23		2	3	1	6	7	1						8	8	1					10		2	1		1	6	12		2							1	8			1
Haemorrhage subcutaneous	6	3		2		12		48	20	3				4	14		1		1			3	19	1			1		2						6	5						8		1		18		1	1
Neutropenia	3	3	1	73		22	1	40	34	6	9	9	1	17	19	1					1	41	32	12			3		38		1	2			28	36		4	1	1		4			2	46			6
Pharyngeal oedema	7	2	28	121		704	3	15	134	28	41	27	11	181	98	1	1		2	1	10	16	46	12			1		49		33	1	6	1	61	79	1	1				1	3	1		14	1		40
Rash morbilliform	15	1	2	860	2	47	1	139	43		5	2	1	16	21	11					7	23	65	8			2	2	115		1	1			155	327		29	1				1	6		123		1	1
Cerebral venous thrombosis				1					1													11																											2
Tonsillitis	15	5	3	108	1	22	2	39	28	5	8	4	4	7	63	2		1			5	15	44	20		1	3		42		9	3			23	41	2	5	1		1		1			39			6
Skin sensitisation						3		2			1	1		3	2							1													2
Smear test	2	1		4		2			3	1				2	2						1	6	1	1					2						3	3										2
Weight bearing difficulty	5	1	3	91		87	1	72	21	3	4	2	1	33	77							10	30	2			1		67		4		1		52	52		3	1		1			2		23			2
Fungal infection	3	2	2	23		13		19	20	3	4	1		15	7			1			5	21	10	2					12		13	1			7	13		5	1				5			13	1		5
Hepatic function abnormal	13	13	9	21		27	4	57	512	2	23	9	5	25	37	2	2				1	8	11	3					8		3	5			75	21					1	5				14			6
Hepatitis	8	13	10	41	1	18	2	13	396	4	29	9	4	20	17	1				4	3	11	8	5			2		8		4		1		83	22		1	2			1	1		2	8	1		46
Coronary artery occlusion			2			2			4	1	2			3	1						3	1		1							4				4
Neutrophil count decreased	9	3	2	54		21	1	72	53	4	11	8	2	26	33		1			1	1	29	40	14			6		30		3	2			27	28	1	2	1		2	6		2		34	1		5
Angiogram normal				3		11		1	5		1	2		7	6						3	3		1					2		2				6	4										1			2
Chest scan									1		2			2								45													2											2
Proteinuria	2	1	4	17	1	16	3	6	37	4	8	2	2	45	15						2	12	6	2					8		8			1	11	3	2									5			10
Liver disorder	3		5	6	1	5	1	16	41	1	2	3		7	21	1					1	17	10	3			4		9		5	1			24	3		1	1		1	1	3			10			20
X-ray limb normal	5		5	18		90		9	22	1	1	2		31	47				1		3	12	3	2			2		16		7	1			15	10						1	4			2			5
Cerebral ischaemia	6	8	1	13	1	14		15	24	1	1		2	7	6	1			1		2	5	6	3					10		2		1		5	4		3		1			4			6			3
Blood iron decreased	4			7		6		7	19		3	2		7	3		1		1			6	6	2					2		2				2	8			1							9			3
Hangover			1	2		3			3	1				3								3	1								1																		1
Abnormal sensation in eye			1	4		31			4	2	2	1		5	6						1	1	1						2		2				1	1	1						1						6
Venogram				3		1		2	1													5	1						1						1	3										1
Autoimmune thyroiditis	1		2	18		6	3	1	38	2	5	3		4	1	3						30	7	3			5		3		8	1		1	11	7			3							2			25
Glycosylated haemoglobin increased			2	14		14		1	18	1	4	3		5	14						3	9	1	2					3		12				3	3													1
Lumbar puncture abnormal	3	2	8	24		102	3	25	59	6	10	15	1	43	21					1	3	12	18	7			1		17		3				24	13		1				2	1			26			11
Pemphigoid	10		2			5		19	25	3			1	5	14							11	7	5					7		2				1	1					1	4	1			3
Culture urine negative	13	1	5	84		70		204	141	4	9	7	1	42	62			1			3	20	63	16			29		86		4				52	58		12	1			5		1	2	143	2	1	4
Kidney infection	2	1	4	5		7		1	5	1	1		1	7	3	1					1	3					1		1		3			1	2	2		1								3
Myoclonus	31	22	4	65	1	22	6	75	68	4	1	2	1	12	15	4						3	50	8			1		62		5	8			21	18		8	2		2	2	2	2		51
Bilirubin conjugated			1	5		4		3	11		1	1		2	3						2	14	2	1			3		1		1				6	1													5
Vaccination site haematoma				2		11		3	6						1							4							3		2				3	2										3
Diplegia	4	3	4	3		53	1	5	11	3	5	4	1	20	14					2	1	10	6	5					5			1			8	1										2	1		4
Stent placement			1			1									3							1																					3						1
Mitral valve incompetence	2	1		2		7		7	9		1			8	8				1		9	14							1		1				1	3							2			5			2
Piloerection	1		2	4		12	1	2	3	2	2			1	1							3	1						4		1				2	2		1								1			1
Rhinitis	357	484	75	929	12	499	22	553	536	10	23	15	8	263	102	18	2	5	3		20	40	164	20			7	4	333	2	68	106	2		57	337		31		12	3		17	2	6	104		1	12
Skin induration			2	9		11		2	3				1	5	22							13	6						5		3				6	14										1
Blood lactic acid increased	5	2		14		12		18	19			1	1	11	17	2	1		1			3	7	3			2		8		1	1			6	5									2	19			5
Hepatic enzyme	1			1		4	1		6		1	2		8	5					1		11	1								1					2										1			5
Mouth haemorrhage	6	1	2	22		12		16	23			2		15	6		1				1	9	9	5			1		11						13	10		1	2							8			1
Muscle disorder	5	6	12	18		43		11	106	2	12	5	10	26	12						1	10	19	4			1		17		6	1			16	4		2	1			1	7			13			15
Subdural haematoma	4	4	2	2		1		19	16		1	2	1	1	2						1	14	10						15			1			3			2				1			1	11		1	2
Uterine haemorrhage			1			1			2					1								7	1								1				5	1													2
Activated partial thromboplastin time ratio									2					1	1							4										1
Lymphocyte count normal	9		3	29		22		33	23	4	13	6	4	15	53						15	12	22	9			2		15		18				19	17	1				1		1			21			7
Monocyte count increased	8	3	3	40		32	2	42	61	3	10	1	3	9	63						17	51	32	6			15		15		14	2			26	20		1								15		1	5
Vitreous detachment						3			4	1					1							5													1
Cyst	3	9	6	13	3	16		20	42		4	3		5	9			1			4	6	13	5	1		2		17		43	2	1		5	16		1		2			7			6		1	6
Skin test	4	3	1	17		16		16	7	1	7	1	1	11	5	1					2	4	4	3		1			4		5	1	1		9	11					2	4				9			1
HIV test negative	7	6	4	27		33		13	65	12	25	23	3	63	23	1				2	12	14	12	12			7		7		11				37	22	2									4			14
Meniere's disease			1	1		5					1	1		3	6					1		7		1							1				3								4						1
Middle ear effusion	1	1		11		10		5	3		1			4	4							4	2	3					3		1				4	7					1	1				4			1
Obstructive airways disorder	1	1	1	5		21	1	10	7		2	1		19	11						1	78	8	2					5		1				2	2							1	1		8			1
Vaccination site hypoaesthesia																						3																											1
Anaphylactoid reaction	36	37	24	59	1	61	11	46	115	12	17	7	5	15	29	1	1			2		1	13	1	1				25		4	6	4		26	14	1	1		1			4			8	1		4
Angiogram abnormal	1	1		1		8		1	7	2	5	3		15	2							4	1	2					1						3	2										1
Nephrotic syndrome	3	1	1	23		14	2	8	49	3	3	1	1	18	16	1			1			4	11	3					6		1		1		10	7									1	4	1		3
Pustule	1			7		1		3	2				1	2	1						1	7	2				1		4						2	5
Herpes simplex test				5		1		1	1												1	9	1	1					2		1				1	6
Immobile	1	1	1	4		16		3	7	1	1	2		11	26	1						7							2		1				4	1													2
Liver function test abnormal	3	5	17	31	1	48	2	18	114	5	22	17	4	31	30		1			3	14	10	21	8			2		18		14				96	19		1				2	13	1		17			54
Respiratory symptom	1			11		8		4	8		1			4	11							5	4				3		4		1				3	6						1		1
Ultrasound pelvis			1	2		2		1	2		1			1								2									1
Blood electrolytes normal	3	4	5	58		34	1	69	52	7	14	14		44	30	1					5	5	39	19					50		5		1		45	31		1	1					1		63			7
Energy increased				2		3				1	1											3									1				1	1
Left ventricular dysfunction		1	1			2		3			1	1		3	1				1		5	4	2	1			1		1		3																		2
Miliaria				9		1		5	3	1		1		10	9					1	2	4	1						6		1				5	5										1
Abdominal X-ray	4	1	1	15	1	18	1	146	78		3		1	12	27							6	49	3			1		62		1	2			12	9		5			2	4				97			1
Prothrombin time normal	2		1	16		13		23	18	3	2	3		16	8		1				7	3	13	2			3		11		7				9	13					1	1	1			10			1
Uterine dilation and curettage			1	6		7			8		2	1		11	1						1	2	2								1				3	5													8
Vascular pain						3								3	1							4
Atrioventricular block	1			1		8		2	8				1	3	4				1		2	2	2						1		1	1			1								4			2			1
Blood immunoglobulin A	4	5		18		9		20	10		3	2		4	5						5	17	12	3			2		7		4				4	8							1			6			3
Breath sounds abnormal	10	3	1	37		30		53	21	2	3	2		19	75				1			11	39	8					24		1	1		1	19	21	1				1	1				28			4
Choking sensation	1			2		18			2	1		2	1	8	3							2							1						2	2										1	1
Cholelithiasis			1	3		6			19		1	1		9	10						2	4	2	2					4		2				6	1							1			1			5
Diabetes mellitus inadequate control						3			1	1	1			2	4							2																			1								1
Listless	12	6	4	142		41	3	167	81	3	11	4	1	36	38	1					1	22	161	25			1		194			1			44	52	1	26		2	2	1	1	2		180			7
Cardiovascular evaluation			1	2		5		2		1	1			3	3						1	3	3	2					2		1				1											3
Labyrinthitis				7		27		3	2	2	2	2		12	3														2		1				2	7
Ultrasound thyroid				2		1			1						1							1														2
Goitre	1	1		4		7	2		14		1		1	7	2						3	2	1	1			1				2				3				1										3
Hemianaesthesia									2	1				3								3													1				1										1
Rash pustular	10	10	8	168	1	63		56	64	6	40	5	3	31	15			3	1		248	17	41	7			4	1	68		93	1			71	382		8					1	4		35		1	8
Serum ferritin increased			1	7		8		5	7		4	1	1	19	12					2	2	9	2						3		2				6	3			1							2			3
Arthritis reactive	1	2	1	8		13			11	4	5	1	3	6	8					1	2		2	1					1		1				6	3		1					2			1			4
Cutaneous vasculitis	2			1		1			3	1		1		4	2						2	5	1						1		1					1
Haemorrhage urinary tract						2						1		4	2							3													1	1													1
Paresis	11	3	15	8		33	2	18	65	10	9	1	6	29	18					1	1	6	29	1					12		1				10	3	1		1			1				7	1		30
Prostatic specific antigen						4									1
Angiogram cerebral normal				2		1		2						3	1							1	1						1						1	1										1
Biopsy kidney						5								2								1	1	1					1		1				1	1										1			1
Ear disorder	22	45	21	157	2	59	1	85	105	3	8	2	3	24	11	2		1			2	6	41	3					71		14	18			13	48		15				1	6		1	65			3
Glossitis	1	3	6	9	1	16		2	20		5	1	1	5	4					1	1	13	4					1	6		2				2	5							1
Neutrophil count normal	3	3	2	24		18		30	38	3	9	2	1	14	27						13	8	18	3			12		21		15				18	17							1			15			7
Sinus bradycardia	1			4		6		1	4	2	4	2	1	6	4						17	7		1					1		7	1			5	2							1						2
Bacterial infection	23	16	19	146		93	6	240	146	6	31	6	9	48	288		1	1			21	41	169	16			12		232		10	8	1	3	43	126		39			1	4	13	8	5	347	1		7
Bundle branch block right		1				3			4		2			2	4			1			5	4					1		2		2				2														2
Culture stool		1		9		3	1	65	18		5	1		3	8	1				1	1	7	17	2					26		1				8	9		4			2	1		2		60			1
Delusion	1	1		4		18		1	6	1	2			9	11	1					2	9	2	1				1	5		1				6	4										1
Emergency care examination																						9		3
Magnetic resonance imaging spinal normal									2	1	1	1		1	2							3		1											1	2			1							2			1
Physical deconditioning									1					1	5							6														3
Transaminases	1		1	5		5		2	10			1		2	3							2	3	3					3						3	2										6			3
Dissociation	1		2	8		9		3	7	4	2		1	3	3							5	2	2							1				2	3					1	1	1						3
Giant cell arteritis										4				5	3							2
Prothrombin time prolonged	1	2	2	14	1	14	2	17	24		3	4	1	8	18						4	6	14	2			2		7		6	1			11	9		2								13			4
Splenomegaly	7	11	3	29	1	12		29	67	6	3	1		12	34	1				1		17	16	2			3	1	22		2				12	9		3				3	1			11			7
Angiogram cerebral abnormal				1		1			1				1	1								1							1						1
Audiogram abnormal			1	10		16		1	6	3	3	1		5	2						2		1	2					1		1				4	4										2			2
Carpal tunnel syndrome	1	1	5	3	1	15			31	1	3	2		20	3						1	3	1						1		17				8	2						1	21				1		7
Coronary arterial stent insertion						2			3				1	1	2							2									2				1								1						1
Vaccination error	8	3		18		24		9	101		11	2		4	15	1				2		7	5	1			1		12		1				18	16										5			4
Carbon dioxide decreased	4	1		16		16		31	13	1			1	7	10		1		1			3	15				1		21		2				11	13		1								16
Immature granulocyte count								1														1													1
Polyuria	4	7	7	25		14		9	39	2	5	2		9	6	1					3	2	7	4					6		11	2	1		6	2			1							4			2
Portal vein thrombosis								1	2													9																											1
Visual analogue scale									1													6
Decreased activity	11	4	1	52		24	1	68	43	2	1	1	1	12	15	2					2	11	28	5		1	2		48		2				32	34		3				1	18	2		33			2
Near death experience	2			2		3								28	5							4		3											1
Ejection fraction normal				1		4			3	2	8	1	1	2	3						24	5									12				3	1													2
Eosinophil count normal	5	1	1	24		21		19	37	3	8	2		19	24		1				9	23	17	7			9		11		16	1			14	10						1				8			8
Erythema of eyelid		1	1	14		17	1	9	6		1	2		4	2						2	3	11						10						7	10										6			3
Pancytopenia	2	1	2	16		11		9	23		2	1		12	18						4	8	6	7			2	1	9		1				5	12						1	1	1		4			4
Staring	29	25	17	405	1	103	8	475	196	11	5	5	1	37	43	5		5	1			45	334	33			4		479		3	11		1	156	201		68		1	6	5	1	5	2	393	2	2	5
Vein disorder				1		10		3	4					3	2							4	1						1						1											1
Eyelid disorder				6		11		3	6		1			6	5				1		3	4	4				1		3		1				6	6										1			5
Hordeolum				1		6		1	1		1			3	2							4	1												1	1										1
Laryngitis	33	35	3	60		89	1	56	47		1	3	1	48	22				1		3	11	23	4	1	1	2	2	30		6	5	1		11	29		1			1	1	2		1	20
Ultrasound antenatal screen abnormal				20		20			6	2		1		26								18							3		1				2	4													4
Vaccination site cellulitis			1	14		20		9	1					9	37						7	4	4						11		1				3	20	1					1				1
Diagnostic procedure	2	1	2	14	1	20	1	8	9		3	2		4	7	1			1		1	4	4	2			1		6		6				7	8		1						1		10	1		5
Lymphopenia	1	4	2	17		4	2	5	21	3	8	3	1	14	18							11	7	2			4		5		2				10	14		4					2			8			7
Red cell distribution width increased	6	2		14		13	2	15	16		4	2	1	6	12		1		1		2	49	13	1			3		2		3				10	10	1	1								4			2
Troponin T increased			1			2			1		5			9	2					1	10	1	2				1		1		8								1
Ultrasound foetal	1					2			1					1																					1	1
Exposure via skin contact				15		48		2	3	7	11			4	5					1		7	1												5	14													3
Sinus operation			1	1		2			1			1		3	3							1					1		1						2	1
Deafness bilateral				9		9	2	3	4	1				6	1							3	2						2		1				2	5										5			1
Hospitalisation	1	1		2				4	2	1		1		1	3							1	1						1						2	1										4
Hyperaesthesia teeth									5													2
Pneumothorax	2		2	4		14		14	10				2	6	9						1	3	6	1					7						1	3										13			2
Heparin-induced thrombocytopenia test						1			2													2
Menopause			1			1			2		2	1									1										2				1				1				1
Oral mucosal eruption	1		1	23		5	1	9	4	1	1			2	3							9	4	1					9		1				10	21					1					1			1
Psychotic disorder	1		2	9		12	1		14	6	10	5	2	20	3	1				2	3	7	3	1					1		3				7				2				1
Transaminases increased	1		1	14		4		10	38		13	3	2	10	10					1	1	79	4	5			1		3		2				17	6	1									5			33
Viral test negative	11	1	4	85		35		69	89	16	12	25	3	47	35				1	1	16	19	33	15			15		26		6	3			63	68	2		1		1	2	1		1	34			15
Acute respiratory distress syndrome	2	1	1	12	1	14		5	1		5			22	10							3		1					1		1			1		6										3			3
Carbon dioxide				1				1	1		1			2	1							7									1				2	1										2
Communication disorder	4	5	4	42		12	2	22	24	1	1	1	1	5	7			2				2	15	2					23			1			16	13		1								11		1	1
Dyspnoea at rest														1								5
Ventilation/perfusion scan														3	2							27																					1
Intentional product use issue									1	1					2							8		1											1	1
Retinal detachment						3			5	1				9	1							1	2	1			1		1		1					2		1											1
Skin ulcer	28	36	56	602	1	126	7	181	258	9	36	10	15	50	47	9		6	1	1	245	43	243	16			9	1	299		88	2	2		91	1703		51			1	1	7	10		200	1	3	17
Tongue blistering	1			6		4		1	4					5	1							3	1												5	3
Biopsy skin abnormal	13	2	5	36		46	2	18	42	3	11	5	3	88	37						31	16	15	7			3		15		21				22	21						1	6			8			10
Electromyogram abnormal	4	5	15	15		175	1	5	53	7	18	8	8	122	28					3	4	12	18	3			1		9		13				31	9			2			1	13			3			29
N-terminal prohormone brain natriuretic peptide increased		1									1			5							1	7		1							2		1		1
Paranoia	1		2	2		8			11	8	6			4	2						2	2	2	1	1						4				2				1									1	2
Vitamin D decreased			1	2		7			6	4	4	1		7	4							1	1	2							1				6	2										1			2
Asthmatic crisis				5					5					12	1							2		4					1							3													1
Hypoaesthesia eye				1		7			2					1								3																											1
Injection site hypersensitivity	2411	3341	3108	3070	11	2610	374	2062	2178	184	189	120	358	487	2351	28	6	7	5	12	66	45	1033	59	2			1	2789		374	761	22		275	1037		109		7		1	57	5	2	167		1	11
Lip erythema				1		2		8	11					2	5							2	2				1		1						5	2
Magnetic resonance imaging brain	1			2		3		2	4	2		1	1	3							1	7	1						2						1											1			1
Neoplasm malignant	1	11	1	6	1	10	1	3	20	1	2	2	4	14	14							9	6				2		2		2				3	5							3			4			4
Psychomotor hyperactivity	17	14	3	197	1	20	3	56	65	4	3	1	1	9	10	3		2			1	8	44	8					74			7			26	39		2			1	5	2	1	3	22	2	2	1
Ultrasound chest	1					1		2	3					1	2							12					1				1															2
Cardiac pacemaker insertion						10			3	1	2			5	7						1	2					1				1				1	1													1
Hallucination, auditory	1		1	2		4		1	5	4	2	2		5							1	5	3	1					3		1				1	2			1				1						1
Joint noise				2	1	2								3	4							7													1
Maternal exposure before pregnancy	1		2	53		6			7	3	3	2		9		1					6	3	3				1				8				3	35													13
Muscle contracture	4		4	6		11		6	11		4	1	1	5	8						1	4	8	2					6		1				9	4						1				1			2
Demyelination	6	3	15	34		68	2	11	236	12	18	5	5	61	12	1			1	3	5	11	18	8					8		15		1		34	13							18			8			26
Wheelchair user	3		6	7		57	2	3	34	1	3	4	3	36	27					1		9	3	3			1		3		1				9	6						1	2			1	1		7
Haemorrhoids				1		5		1	5	1	3	1		5	1						2	15	3						1		21				2	1		1					3			1
Meningitis	135	140	25	158	2	53	11	432	191	12	23	22	4	22	75	3		2	6	2	9	10	123	48			12	2	149		7	36	2		29	60		26	1	1	2		3	6	3	181		1	19
Metamorphopsia						10			1					2							1	2	1						1
Protein C	1			1		2		1	1	1	1	1			1							2							1		2				1	3
Platelet factor 4																						5
Respiratory syncytial virus test negative	4	2		49		24		90	29		2	1		16	22						1	10	24	2			3		38		1				42	36		4				1				37			2
Accidental underdose				2				1	4					1								3							1						3
Erythema nodosum	6	6	6	19		16	2	5	77	4	12	1	2	9	17				1		2	6	9	1			3		6		3				11	8						1				4			6
Furuncle	8	5	6	19	2	19		11	16	2				10	13						6	5	5						9		4				7	19		2					1			3			1
Glomerular filtration rate normal			1	2		5		3	3	3	3	2	1	4	10						3	2	7	1					1		4				3	1			1								1		2
Lip disorder						13		1	1		1		1	4	2								1						1						2											1
Tearfulness	19	1		19		13		21	18	1	4	1		10	8							10	18	5			4		4			1			11	9									2
Arteriosclerosis		1	4	1		8			7	1	5	1	1	8	8						3	1		1							2				2	1						1	2			1
Drug eruption	1	1		11		8		5	4		2	2		7	18							9	4						3		2				1	2						1				2			4
Intervertebral disc protrusion		1	2	1		19		1	18	7	4	3		11	2						3	9	2								9			1	5	1			1			2	9						9
Lipase normal			1	3		8		3	8		9	1		2	4					1	1	4	4						3		4				10	3										7			3
Ovarian cyst	1			2		3		1	4	1				4	1						2	4	2	2					1		5				8	4							2			1			3
Partial seizures	3	2		30		11		30	13	1	1	2		9	3				1		1	17	13	7					21		4			2	12	16		1								20	1		2
Respiratory tract infection	23	5	2	62	1	694		100	33	8	3		1	55	55	1	1	1	1		2	27	38	10			4		31		5				9	25		1			8	7	2			42			5
Creatinine renal clearance				1											1							15																											1
Influenza A virus test				4		4		5	1	1	1	1		4	4						1	2							1		1				5	3									1
Muscle atrophy	16	17	25	28	1	70	4	15	136	6	13	5	12	34	30					1	1	4	19	2					19		12	2	1		34	11		4	2				12			7	1		16
Skin haemorrhage	2			6		6		15	8		2			4	4							5	3	1					5		1				3	1					1	2				3	1
Superficial vein thrombosis															1							3
Ischaemia						8		2	1			1		8	3						2	1	1								1												1			1
Joint effusion	1	2	4	27		26		9	20	3	6	1	4	17	33						1	9	10	3			1		9		7	1			16	9			1			1	11			5			9
Premenstrual pain																						1
Aura			1			12			4	1			1	3								1	1	1					1		1				1								1						2
Diabetic ketoacidosis	1			10		7		7	1		1	3		2	5							12	1	2					2		1				5	5		1								2			1
Monocyte percentage increased	17	2	2	40		19	1	54	27	3	8	4	4	11	56						14	12	32	7			3		14		16	2			23	24	1	2				1				22			5
Ventricular hypokinesia									2		4	1		3							4	8									2					1													1
Visual acuity tests			1			2			2	1	1											2													1								1
Cardiac monitoring abnormal								1							2							1
Enlarged uvula				1		9			1	1	1			6	2																				1	1
Lipase increased			1	7		6			4	2	2	1		8	2						1	1	2						1		1				2	1							1						7
Localised infection			4	7		19		3		1			1	7	45						3	9	1						3		2				1	6										1
Lumbar puncture normal	7	1	7	72		94	1	97	81	7	15	12	3	24	34	1					8	9	51	10			2		64		11		1		56	43	1	2	1		2		2			86			19
Mammogram abnormal			1							1				1																																			2
Cardiac murmur	13	2		17		8	1	25	18	1	2		2	12	8			1			4	15	20	1			2		17		4		1		7	8										15			1
Defaecation urgency				2		8			2			2		3	2							4	1						3		2				3	2										1
Eye contusion				4		1			1	2				2	1							8		1																									1
Smear cervix			1	1		2								2	1							4														1
Blood immunoglobulin E	2	3	1	18	1	10		12	10		5	12		4	6		1				2	6	7	1			3		8		4				7	8						1				5			2
Chronic kidney disease						2		1			2	1		1	5							1													2
Dermatitis acneiform		1	1	12		5		4	6		3			3	4			1			6	3	4						5		8				6	13										2			1
Protein urine present	3		1	9		26		11	17	3	8	2		51	23						3	7	6	5					4		6				13	3	1				1				1	7			5
Blood chloride increased	2	1		6		8		12	16	1	1	2		8	6						1	2	9	1			4		5		2				3	2										4
Gastroenteritis	51	54	4	116	2	39	5	207	146	7	10	2		34	35	2			1	3	5	66	100	22			6		131		8	14			37	62	3	19		31	2	1	3	1	3	115	1	1	11
Heart sounds																						5
Infectious mononucleosis	1	1	1	8		6		2	12	4	3	2	1	1	4					1	1	5	5	2					1				1		10	7							1			2			6
Suffocation feeling				1		4		4	2					2	2							3	4						4						1			2								2
Thyroid disorder	2	1	5	6	1	13		2	40	1	2	1	1	5	6				1		6	8	4	1			1		2		12				5	2		1		1			5			4			7
Tongue erythema				2		1			2						1							1													1
Blood potassium increased	7	3	1	11		10		41	30	2	3	2	1	19	18		3		1		2	7	20	2			5		21		2	1			10	7		3				2				30			1
Breast discomfort						3								1	1							1
Antithrombin III	2			2		3		4	2		2	1			3		1		1			4	1				1		2		3				2	4										2
Hepatic pain						1			4					3								4																											2
Parvovirus B19 test				5					3		1										1	20		1					1						1	2										1
Slow response to stimuli			2	16		8		15	10		2			3	11							5	18	5					11		1				8	8										10
Computerised tomogram abdomen normal				3		14		2	7		3	4	1	20	10						2	1		4					3						4	2							1			2			1
Facial spasm				5		1		5				1	1	2	2							2	3						2						2											2			3
Hiccups	1	2	1	5		10		5	8	1	2	2		7	7						1	4		2					4		1	1			2	1							1			3
Intracardiac thrombus															1						1	2									1
Sunburn	1			2		8	1	2	3	2	5			1	8						6	5	2						2		5				2	7										1
Suppressed lactation																															1
X-ray limb abnormal	3		1	7	1	41	1	3	15	1	2	2	1	24	27							7	2				2		5		2				2	2		2	1			1	7			1			5
Apnoea	792	770	29	326	2	138	9	1353	678	4	10	2	3	47	92	6	2	2			1	47	607	37	2		10	1	692		5	243	1		54	93		173		11	3	4	1	4	9	615		2	8
Ascites	1	2	2	12		11		19	31	1	3			2	7							3	8	1			2		8			1			4	4										11			2
Autonomic nervous system imbalance	1		1	4		10		3	19	16	6	3	3	14	6					1	4	7	5	1					2		7				5	1							2			3			4
Brain injury	11	9	3	44	2	8		14	17	1	2		2	16	4	1			1			8	7	2					20		1	1			12	10		2	1							17			1
CSF cell count	2		1	2	1	6		9	5	4	1	3	1	4	3				1			4	6	1					5			1			1	2		1								8			6
Herpes zoster oticus				1		4								3								2									1					8
Periorbital oedema	3	1	4	49		34	1	8	19	3	10	10		11	7						2	6	26	3					22		3	1	1		17	34		2								10		1	2
Ultrasound kidney				1		6		3	2		1				1							9	2	1					2		1				2	3										1			1
Monocyte count normal		1		15		10	1	16	24	2	9	4	2	13	25						7	7	10	6			3		10		15				16	10		1				1	1			14			6
Myocardial necrosis marker increased						2		1	1					1	2						3	2	1	1					3		4					1													1
Sputum discoloured	1		1	3		24		2	2		1			31	15							114							1						1											4
Ultrasound abdomen normal	18	2	7	18		15	1	84	62	5	4	3	2	13	23	2					1	19	37	5			3		28		2				16	11					1	2	2	1	2	51			15
Abscess	60	56	82	113		114	14	128	99	6	3	5	9	37	77	2					10	15	118	6			12		168		12	25			31	74		27		1		1	2		1	74			4
Ophthalmological examination abnormal	3	1	2	7		17		6	30	2	5	2	2	18	7		1				2	3	5	5					6		1				10	8	1		1				1			11			10
Pulmonary hypertension		1	1			5		3	4	1			2	7	4						2	9	3	1			2		3		3	1										1				5
Eosinophil count increased	10	2	1	13	1	13	2	26	35		4	4	3	17	26	1					5	5	13	4			7		9		3		1		8	6			1			2	1			16			3
Eyelids pruritus			1	2		19					1			1							1	1	1						1		1					2													1
Hypogeusia			2			7			1			1		2										1											1														1
Myocardial ischaemia	1	1				9		1	1	1		1		7	5						3	1													2	2							1
Neuritis	4	5	36	18	2	81	4	6	101	9	13	7	9	30	19				1	1	1	4	14	2					5		7	2			20	8			3			1	3			1	1	1	11
Pathology test	1	1		2		11	1	15	17	3	2	4		14	8		3					9	3	2			4		5		4				5	5					2	1				4			2
Poor peripheral circulation				6		7		13	7		1			2	2							10	4	1			1		4						2	3		1					1			5			2
X-ray of pelvis and hip				2		8		2						3	2							3	1						4		1				3	3	1
Blood blister				2		8		1	2		1			4	7							2	1						2							1		1								1
Faeces soft				1		2		6	5		2			4	3					1		1		1											1	1
Sedation	3		2	2		9		5	1					2	7							2	1	1			1		3		1				2											1			2
Type I hypersensitivity				5		2		4	5		1	1			6							2	1	1					1																	1			1
Uterine spasm						1																																											1
White matter lesion	1		1	9		10	1	3	14	7	2			22						1		6	2	2					2						2	2			1							2			2
Aspiration	1	5		12	1	9		39	14	1				9	11	1			1			77	26	1			2		26			1			4	6		5				2		1		32		1
Computerised tomogram spine				1					3													3
Nipple pain						1								2							2										1
Petit mal epilepsy	11	4	3	63		13	1	37	29	1		2		6	3	2						8	24	10				1	42			1		1	18	22					1	3		1		29			2
Vestibular disorder	2	1	2	11		16	1		43	2	3	3		12	2		1					3	4					1			2				6	1			1				1			1			8
Chronic fatigue syndrome	3	1	5	13	2	5	4	1	50	8	12	4	5	16		1					3	17	12	4			2				22			1	14	3			5			2	3						16
Hepatic cytolysis														2								29		1											1
Language disorder	2			31		2		9	4					2	3							10	1	2					11						8	9										3			1
Type IV hypersensitivity reaction			1	5		7		6	3	1	2	1		5	9							3	2						4						3	8										4			1
Eyelid rash			1	6		5			5	2	1				2							1	2						2						7	4										1
Peripheral artery thrombosis																						4
Peripheral vascular disorder	25	36	18	24	2	26	2	30	96	8	6		2	12	18	3					2	3	15	3					18		3	17			4	8		3	2		1		4	1		7			12
Platelet transfusion				8		7	1	10	20	1	1	1		13	5								4				3		2						4	7						1				5			2
Vulvovaginal pain				2		4			1		1											2	1													1													1
Injection site haematoma	6	1	8	63		391	3	54	38	1	7	5	4	47	127						1	9	40	3					77		3	1	1		52	89		2			1	1				26			8
Psoriatic arthropathy						4		1	9		1			5	3							20		1							2				1	1							1						2
Synovial cyst				2		4		1	1					3	3							3					1								1								3
Arteriogram carotid normal				1		2			1	1	2			2	2																1		1		1														1
Post herpetic neuralgia				1		3			2				1	4	4							4	1	1												4													1
Screaming	3318	3546	11	857	3	95	34	4268	1846	4	4	2	4	63	158	9	1	15				114	1377	30			5	1	1709			1018		6	142	225	1	353		31	8	5		18	7	1087	1	10	4
Staphylococcal infection	2		1	31		56	1	26	23	1	5	3	1	27	66	1					8	33	16	3			1		35		5	1			23	44		1			1	2	1			20			3
Tongue ulceration			1	5		8		1	2	4	3	1		5	2						4	4	4						2		5				3	5		1								2			1
Abdominal tenderness	3		1	5		10		11	12	2	6	3		8	10					1	1	8	7	1			1		5		3				5	3	1					1				7			5
Arthropod bite	1		2	17		12		15	10	3	7			4	6						1	8	8						9		2				20	33		1					2			8	1		2
Eosinophil count decreased	1		1	17		5		11	24		4	2	2	9	22					1	7	45	6	2			5		4		8				9	7						1				5	1		3
Foaming at mouth	7	2		41		20		63	30	8	5	1	1	6	19	4				1		12	35	14			1		43		2	1		1	24	25		3	1		1					40			6
Type 1 diabetes mellitus	1		5	72		14	1	4	49	1	3	5	2	10	2						3	11	9	9	1		2		20		19				15	14		1	1							5		1	2
Blood urine	1		2	5		4		3	9		2	2		5	2							3	6	2			5		6		3				4	3		2			1					3
Eye infection			2	8	1	15		11	5			1		8	4							4	3	2					4		1				2	6					3					2
Temporomandibular joint syndrome				2		10			3	2	1			5								2							1		2				4								1						1
Treponema test negative	7	1		13		22		6	35	10	12	18		38	6		1				5	5	13	2			1		1		6				24	8	1		1			1				1			10
Vaccination site nodule	8			10		13	1	29	7				1	2	4						1	9	5	1					9		3				3	6					7	11							1
Arteriogram carotid						1								1								3
Embolic stroke																						1							1
Moaning	13	2	2	33		19	1	72	29		3			15	25							18	55	8					57		1				23	21		1			1	2		1		55			2
Skin weeping	2			1			1	2	1					1	2							4	3	1																									1
Basophil count decreased	1	1	1	22		9		13	50	1	4	2		7	11						9	8	6	5			13		7		8				10	9			1							3			5
Hyperkalaemia	10	11	1	6		12		18	14				3	15	14		2		1		1	3	7				2		11			8				3		3		3						2			1
Bladder pain						4					2	2		5								4					2								1	1
Endometriosis	1		1	2					6					1							2	8	1	1							3				1														1
Generalised oedema	10	8	7	26		13		16	36	3	2	4	1	6	16						1	11	8	3					16		2	1			5	9		1					1	1		9			1
Neurological examination normal	12	3	11	77	2	50	3	57	81	19	21	15	2	45	20						1	16	56	22			1		58		3				43	46	2	1	3				1	1		49			32
Tri-iodothyronine				2		1		1	1					2							1	3	1	1					2		2				1	1
Tricuspid valve incompetence	1					3		1	6		1			2	1						2	7		1			1				1				1								2			1			1
Activated partial thromboplastin time prolonged	2	1	2	7	1	5	1	16	20		2	3		6	11		1		1		1	2	15				3		8		2				5	5		1				2			1	5			1
Candida infection				14		3	1	12	5	1	2		1	4	4							19	4	2					3						4	1										1			4
Eyelid pain						8					1			3	2						1	4														2
Ligament sprain				1		3		1	3	1				4	2							14	1						1						2	1			1						1
Pyelonephritis	3	1	3	10		5		12	12	3	3	3		1	8	1					1	4	8	1			1		7		3		1		7	3		1		1					1	16			2
Tic	5	5	4	57		47	2	25	33	3				12	16	1		1			1	9	28	4			2		55		2	1	1		23	40	1		1				2		1	22			4
Alopecia areata				5		2		1	21		3	1		3								3	3	1					1		2				6	5								1		2			4
Antibody test negative	3		3	189	2	23	1	34	159	20	8	7	5	37	86	2			1		3	10	18	1					12		11				24	411	2	2	1				5	1		12	1	1	18
Drainage	1							1							2							2							1
Thyroxine free normal	1			8		7		2	11	1	4	3		6	3						3	1	4	2			2				11				4	4										5			4
Vaccination site vesicles				6		2		2		1	1	2		4	8						2	6					1		4						2	11
Activated partial thromboplastin time shortened	2	1	1	7		4	1	10	5		2	1	1	3	6						2	9	7	2			1		3		1				7	3			1		1	1				5			1
Exercise electrocardiogram				2		5			1					4	1						3	5									4
Haptoglobin								1						3	2							6
Injection site joint pain	2		7	12		82		3	6	1	3			31	61						1	3	4						13		4				7	11													2
Lymphangitis	2	1	4	7		11	1	1	10	2	6		3	9	60						81	6	4				1		7		11				5	4										4			1
Sweating fever																						1
Yawning	3	3	3	8		8	1	7	6	1	1			6	1			1				2	8						5						6	5										2		1
Electromyogram normal			17	12		55		3	62	7	8	5	4	10	6						3	10	6	4					4		10				20	5			1				6						8
Human chorionic gonadotropin negative				2					7		3				1					1	4		2	1							9				3	2													2
Injection site movement impairment	8	3	2	27		34		46	24					15	57	1						11	14						53		1	1			17	22						1				8		2	1
Lymphoma	1	1		5		7		4	7	1	1		1	8	11						4	14	1	2			1				3				2	2										2			5
Sleep deficit				1						1				2	1							4													1
Urine output decreased	2			20		20		48	26	1	2	2	1	12	10			1			1	5	15	4					21		1				7	8		4			1			1		25			1
Basophil count normal	6		1	11		10	1	14	18	2	6	1	2	9	18		1				8	5	11				6		4		13	1			11	5						1				4			5
Cytomegalovirus test negative	5	2	2	57	2	31		24	55	10	19	14	3	58	14				1	1	9	16	24	23			7		16		8	1			28	15	1		1					1	1	24			14
Facial asymmetry	1			3		3		4	6		1	2		8								4	3	2					4		1				1	1										2			1
Fluid intake reduced	9			44		19		50	12	2		2		14	6							11	31	6					45					1	21	22		1								50			1
Hepatic steatosis	8	9	3	4		5	1	8	29		3	6	1	9	6						4	3	2								4	2			5						1	1	2			1			11
Injection site indentation			1	3		2		1	2					1	3														1						1	2
Melaena	7	7	1	10		6		42	24		2	2		5	21							19	28	5					18		2	3			6			3		12		1				14			3
Ophthalmic migraine				1																		1									1
Refusal of treatment by patient				1		4			1		1			1	3																				1	1
Urine abnormality	1	1		2		11		4	9	1				12	9							3	4	1					5					1	1	1		2								3	1		1
Urine odour abnormal				4		5		3	9				1	3	6								2				1		4						4	2										1			1
Abnormal loss of weight				3		7			4	2	2	2		3	1							2		1							3				2														1
Angiotensin converting enzyme				1		12			17	2	4	2		20	2							7		1							1				6								1						6
Beta-2 glycoprotein antibody						1			1													4
Central nervous system lesion	4	1	5	14	1	19	1	6	49	6	3	2		39	5	1					1	19	4	3					7		4				13	11										2			6
Lymphocyte count increased	15	8	1	30		11	2	66	62	4	4	2	4	34	32	1					3	40	42	10			18		29		1	5			21	16		2	1			1	1		1	28			5
Mesenteric vein thrombosis									1													2
Sleep apnoea syndrome	2	2	3	7		11		16	29	1	4	1		10	9						5	9	7				2		12		27				4	1							4			6			3
Thyroiditis	1	1	3	7		4			38	1	2	3	2	3							1	2	4								6				6								4						3
Ulcer	2	1		7		6		3	5	1	2			4	2						2	6	1	2			3		3		1				4	5					1				1	1
Ultrasound abdomen abnormal	8	7	1	19		20	2	176	103	5	10	1	2	10	31					2	1	9	36	8			3		50		3	3			16	8	1	1	1		2	12		1	2	82			10
Base excess				1		1		6	5						2							2							2						1											1			1
Blood pH	1			1				2							1							20	1																							4
Blood pressure normal			3	5		33		1	11	1	5			5	15						3	1	5	3			1		2		2		1		21	17										1			3
Electrocardiogram T wave inversion				2				1	3	1	3			2							16	1							2		9				2
Electrocardiogram ambulatory abnormal						4					1			2	1						3	3	1						1		3				1				1							1
Histology	2	1		2		1		3	4	1				1								9	1						2							1					1					3
Increased tendency to bruise				11		8		1	2		1			6	1							4	1	1					2						6	3										1
Prothrombin time ratio				2				1	2												1	21	3						1																	3
Radioisotope scan	1			2		1		3	11	1	1	1		1	2							12	1	2			4								3											1			1
Respiratory rate decreased	2		4	8		15	1	28	19		2			7	8			1			2	11	21	5					20		2				4	4		5		1		1		1		26		1	2
Varicella virus test				29		4		7	6		2	2		2							1	3	2	1					8		1				17	73													1
Asphyxia	12	15		8		3		43	27					5	7		1					3	38				1		28		1	3			1	2		11		1	1	2		1		26		1
Eosinophilia	14	7	8	21		13	1	22	61	3	8	4	2	22	22		3				4	13	14	8					15		10	2			13	7		3				2		1		11			6
Sitting disability	2							1	3					2									1													1
Areflexia	4	4	3	19		72	1	9	24	10	7	7	2	114	10						2	10	11	5			1		7		2				13	7			4			1	1			6			18
Breast enlargement				1		1
Foetal heart rate abnormal				3		12				1		1		10								5							2																				2
Ischaemic cerebral infarction	1										1				1																					1
Nasal dryness						3								1	3							2							1
Transient global amnesia						7								3	2																				2														1
Blood glucose fluctuation				1		7		1	2		1			7	2							2		1					1							1										1
Injection site infection	2		18	60		131	4	33	17		4		4	34	202						14	7	33	2			3		64		2				23	66	1	6				3		2		23			5
Maternal exposure timing unspecified				1		2																1
Pulmonary physical examination														1								1
Pulseless electrical activity						1			1		1	1		2								3													1														1
Renal function test normal	3	7	3	18	1	17		14	31	10	6	6	4	29	29	1	1		2	1	2	8	10	3			1		17		1				11	9	2					1	1		1	8			3
Testicular swelling			3	24		7			5					2	3						1		3	1			1		5		1				4	6										2
Tongue biting				5		8			4	1	2			2	2							2	2	3					3		1				9	3			2							1			3
Angiogram pulmonary normal				1		1		1						1	1						2			1					1		1				1	1
Cardiac monitoring normal				1		8		1	3				1	2	7						2	4		1					1		2					2										1
Cerebellar infarction				2						1	1			1								1																1											1
Herpes ophthalmic				2		4			1					1	1									1												1
Lip injury				1		12	1	2	3		1	1		3								3	1	2					2						6	9													2
Rales	12			11		20		27	22		1	2		22	28	2						81	17	1			1		11		1	1			3	10					1	1			1	17			1
Temperature regulation disorder	4			1		2	1	3	2	1	1	1	1	1	1							1	4	1					2						1	1						1				2
Thyroiditis subacute						3			3	2			2	6								1		1													2
Adenovirus test	6	2	1	15		1		26	16		6	4		8	14				1		4	9	10	4			5		5		3	1			11	12						2			1	16			2
Cataract	2	1	1	7	1	1	2	3	11	1	2	1	2	7	7						2	31	3				1		3		1				2	4							3			2			2
Disorganised speech				1		1			2						1							4													1
Intraocular pressure test						2			1			1	1	2								6													1	1
Joint lock			1	2	1	6			1		2		1	4	6							1	1								2				2	2							1				1		1
Rhinalgia				5		6		1	2					3	1							1	1	1					1						3	3												1
Aortic dissection									1																														1
Gamma-glutamyltransferase increased	4		5	8	1	20		17	156	4	20	9	3	35	37		3		1	3	1	58	25	1			4		6		3				55	6			3			1				13			98
Meningitis aseptic	1	2	1	21	1	13	1	17	32	4	4	7		9	15		2		6	1	3	9	5	5			7		1		2	1			14	13						2	1			7			3
Protein S																						2
Thrombotic thrombocytopenic purpura	1			5		6		2	5	1	1			17	4						4	3											1		2	3										2			1
Tonic clonic movements	1		10	57		37	3	28	21	2	7	4		3	3						1	22	30	21					34		4		1		52	35		2			1		1			31			9
Appendicitis perforated								1	3						1							2	1	1					1
Blood fibrinogen increased	2	1	1	4		4		7	14		1	1		10	6							5	5	1					6		1				4	1			1							13			3
Cerebral disorder	1		1	8		6		2	12	3	2			4	6					2		6	3	3			1		4		1				8	4						1	1			2			2
Increased appetite	1	4	2	9		1	1	5	7					1	1							2	5				1		10		1			1	3	3		1		1				1	1	3			1
Jaw disorder			2	1		5			3				2	3	2							3	1								1															1			1
Retinal haemorrhage	2	2		1		6		21	16			1	1	4	3		1					4	14	1			1		18			4			1	5		5				1				20			2
Stress cardiomyopathy						4								7	6							3														3
Acute disseminated encephalomyelitis	1	3	2	43	3	50	3	8	30	16	10	3	1	84	7	3				2	1	7	15	11					12		2		1	2	30	22	1	1				1		1		10			7
Hepatomegaly	7	5	2	23	2	8		25	113	3	7	5	2	10	13					2	2	9	16	5			4		16		5	2	1		37	10		2		1		2		1		20			11
Herpes simplex test negative	2	3		24		7		16	40	5	4	6		26	11						1	15	8	13			18		12		1	1			17	13			2			1				3			3
Immunoglobulins	2	2	2	12		10		12	9					4	6	1						7	5	1			1		8						4	7		2	1							11			8
Oral candidiasis	12	16	1	14	1	3		29	24		2			12	10	1					1	11	11	2			4		15		1	3			3	7		4							4	7
Urobilinogen urine	4	2	1	8		3		9	5			1		2	2							5	5	1					2		1				2	4										1
Autoantibody test				1		2		1	2					1								2	1						1																	1
Loss of control of legs			2	6		22		1	5	2	2	2	1	9	4							1	3	3					1		1				6	4										1			5
Atrioventricular block complete						2			3					1							1	1		1			1
Basophil percentage decreased	10	4		13		10		41	16		5	3	1	7	31						6	6	11	6			4		6		8				11	8						1				14			5
Coronary artery thrombosis						1			3													8									1
Electroencephalogram abnormal	144	152	14	255	7	92	8	308	208	14	16	14	6	45	23	8	2		1	2	7	23	172	13			5	1	262		8	31	2	4	68	103	2	28	3	8		5	2	2	2	201			15
Febrile convulsion	560	540	4	1931	3	402	19	1528	365	14	7	6	2	152	217	3	8	3	6			119	573	143		2	4	3	995			217	2	6	512	903	5	105		2	9	21	1	24	2	657	1	1	9
Orthopnoea				1		5	1		1	1			1	9	3						2	2														1			1								1
Reticulocyte count	1	2	1	5		1		4	6		2			1	10							3	4	2			1		2						9	2						1				1
Thermal burn			17	9		25		2	23	1	5	3	5	11	15						7	6	4	2			2		6		17				6	6							3		1	3			3
Angiogram pulmonary														1								2														1
Autoimmune haemolytic anaemia	2			5		2		12	5					4	7							7	2	4					3						2	4						2				1			2
Glycosylated haemoglobin normal				1		8			5		2			8	4						1	2	1	1							4				2	1			1							2			2
Mononucleosis heterophile test negative			3	29		24	1	1	8	2	8	6		8	4	1					4	4	3	7					6		3				31	18										2			2
Optic ischaemic neuropathy						4								6								1													1
Optical coherence tomography						1			1					1								2
Post viral fatigue syndrome		1		8		4			10	2		2	1	3	1							4	3	3				1							4	2													8
Rosacea			3	3		7		3	4				1	4	1							2							1		4				2	3							1						1
Skin infection			1	20		38		11	10		3	2	1	5	66						3	4	7	3			1		9		6				9	26										1
Upper respiratory tract congestion	3	1	1	13		49		23	12		1		1	33	23							4	10	1					13		3			1	11	14		5			1					8	1	1	3
Appetite disorder	5		1	7		3		13	11	1			1	6							1	1	5				1		7		2				3	1		1				1				7			1
Biopsy liver									4		1	1									1	4									1																		1
CSF glucose	1	2		6	1	6		12	33	5	1	6		9	6	1			1	1		8	7				14		6						4	4										6
Glassy eyes			1	8		6		11	7				1	5	3							6	5	4					11					1	10	10										3
Infarction	1			1		4		3	3				1	4	1						1		3						4							1		2								3			1
Intestinal obstruction	2	3		6		8		51	37	1	3			3	15	1		1				20	39	3					41			4			1			5		24						17			1
Joint dislocation	2			2		7		2	6	1				4	7							3	1				1		2		1				2	2							1						1
VIth nerve paralysis	1			11		10		9	6	2		1	2	14	3								4						5						5	8						1				2			4
Autoimmune hepatitis	1			2		2			17	1		2		5	7							1	1						1		1				19	1							1			1			7
Hepatitis A virus test	1		2	2		7		1	9		1	3		5	3						1	13	1						1		1				10														11
Papilloedema	1		3	5	1	12		2	25	11	3	1	1	19	4						1	5	1	3					3						8	1	2		1							1			3
Rib fracture				1		5		2	2	1			1	4	3							7	1						2													1	2
Tongue dry	1			3		4			1		1				1								2													1										1			1
Vaccination site joint movement impairment	3							2						1	6							2	2
Abnormal uterine bleeding
Bruxism	1	1	5	22		15	1	18	7		3			5	5						1	4	15	1					24		1				29	20		1					1			8			1
DNA antibody						2		1	1					1								9		2							2				1							1
Disability	24	12	3	47	1	31	4	17	59	5	4	2	1	52	27	1					4	21	25	12			6	1	13		9	2			8	11		1	1			13	2			14	1	1	11
Disseminated intravascular coagulation	3	4	3	7		3	1	7	8		2	2		2	13	1					1	1	3	2					3		1				4	5						1				7
Frustration tolerance decreased	1			7		1		5	2		1				1							7	5						3						3	4										1
Microbiology test				2		2		3	4						1							3	2						4																	5
Peripheral venous disease															1						1	2
Red blood cell count increased	1	1		4		3	1	9	9		5	2	1	7	8				1		2	3	7	1			3		6		3				9	3										4			2
Acute pulmonary oedema						2		2						3								2
Double stranded DNA antibody				1		5		3	6	1	3	3		18	3							6	4	1							2				5	1							1			1			2
Immunisation reaction	2	2	4	28		61	1	19	15	1	5	2	2	9	38					1	4	5	13	1					19		4				22	28			1			1				21			2
Mechanical urticaria				3		4		3	3					2	2							5							4		1				1	2													1
Peripheral ischaemia				1				3	4	1				3	4							5							1									1								1			2
Peroneal nerve palsy	5	4		6		37	1	5	24	2	1	1		15	8	2						7	4						3		2		1		7	3		1	1				1						5
Sinus arrhythmia		1	1	5		1			1	1	2	1		1	1						5	4	1								3				3	1
Abdomen scan			1					2							1							11													1											3
Blood homocysteine						1		1	3		1			2								2	1						2		2					3													1
Colitis ischaemic						1									1																															1
Drug screen negative	1		1	12		20	1	8	9	2	1			2	4						9	6	9	3					8		11				20	8										4			3
Increased upper airway secretion	2	1	3	15		104	1	18	15	6	5	5	4	39	28						2	7	13	5					12		5			1	13	12		1								21			2
Mammogram normal						2			3		2	1		1							1	2	1								2												1
Trigger finger				1		1			1					1	3							3													2								1
Ankylosing spondylitis	1		1	1		1			24	1	2	1		8	3						2	6	1				1		1		7				5				2			1							3
Haemorrhage intracranial	4	8	1	8		6	1	13	11		2	1		5	1							6	8	1			3		11		1	2			1	1		2		1		1				7
Lacunar infarction						1				1				2								1
Lipids normal				1		8		1	8	2	5	1		5	2						5		2						2		7				3	1							1			1
Thyroid mass						1			1				1	1								2
Urine leukocyte esterase	1			6		7		11	6		1			2	8						1	1	5	1			1		5		5				4	4										2			2
Blood chloride decreased	1	1	1	4		12		7	6		1	2	1	9	9						4	1	2						3		3	1			5	4			1							3			4
Globulin		2		4		5		7	4		2	2		1	9							6	6	1			1		3		2	1			6	6
Glucose tolerance test				1		2								1															1						1	2
Iridocyclitis				3		1			8		1	4										4	1	1			3		1						2														1
Parkinson's disease			1			6			4					4	1							1									1				2								1
Pneumonia bacterial	1			3		3		3	1					9	21							5	3	2			1		1						1									1		1
Serum ferritin normal	2		2	8		5		5	9		6	1	1	3	5		2		1		3	4	6	3			2		3		4				7	5						1				5			2
Dermatologic examination	1		1	1		2			1						1							9																											1
Drug screen				5		7		6	5	1	1			2	1							5	3						5						7	10										2			1
Eosinophil percentage decreased	7	3		13		10	1	28	11	2	3	3	1	5	35						3	4	10	3			1		3		4				8	3						2				13			4
Hyporesponsive to stimuli	12	1	1	41		20	1	59	33		1	2		4	30							17	51	8					28			4			19	16									2	11	1		1
Intracranial pressure increased	59	55	2	15		9	2	66	32	4	2	2	1	6	5					1	2	2	18	1					16		2	18			5	4		3	1	1			1			10			4
Iron deficiency anaemia		1	1	6	2	3		3	6		2			2	3							2	2	1			1		2		1				5				1					1		2			3
Cholecystitis	2	2	1	3		9		1	17	2	2			5	3						3	1					1	1							3	1													2
Coronavirus test																						1
Exfoliative rash			1	11		14		9	5		3			7	5						3	4	2						7		1				6	13								1		2			1
HIV antibody				1					2			2									2	4													1	1													1
Myoglobin blood						4			3						3						1	2	2																										1
Nail discolouration			1	1		3		5	5	2	2			1	1						2	2	1						2						1	4										1
Respiratory syncytial virus test			1	14		9		17	10			1		7	3							5							6						17	14										7			1
Sarcoidosis	2	2	1	4		13	1		33	4	2			5	3						1	2									2				6								3						8
Blood triglycerides increased			2	5		4		7	14	3	4	3	1	10	6		1				4	5	4				1		1		5				7	5						1	2			3			4
Breast feeding	1			3		1		11	6					1	2	1							3						5							1		2			1					8
Computerised tomogram pelvis abnormal												1		3	1							1
Gastroenteritis viral		1	1	14		8		9	8		2			7	11	1					1	11	10	3					8		2				11	9		4							1	12			2
Mean cell haemoglobin concentration decreased	2	1		5	1	4		11	11		1			2	7							42	4	1			3		3		2	1			3	1						1				6			3
Mean cell volume increased		2	1	4		8		5	6		1	1		6	17						1	4	3	1			3		1		2				3	1										3			2
Type 2 diabetes mellitus			2	4		10			8	2	3	1		10	8						1	3	1								3		1		2														1
Uterine pain						1																2													1
Caesarean section			2	58	2	25	2		9	11	9	6	1	69	4							91	5	3					3		2			5	9	31											1		7
Conjunctival hyperaemia	4	1		28		23		18	6	3	2	3		12	6						1	10	9	4					9		1				11	14		1								10			2
Epstein-Barr virus antibody	1	1	1	2		2		5	6						1		1					5	1				2		2						4	3						1	1			3
Left ventricular hypertrophy						1		2			1			1	3						3	3							1		2				1											2			1
Menometrorrhagia									1													2														1
Noninfective gingivitis				1		1									1							1														2													1
Office visit
Radiculopathy			4	3		13		3	8		2	1	5	16	4	1				1		4	3								2				4				1			1	9						5
Snoring			2	10		16		5	9	1	2			9	2							2	3	1					4		3				17	9										2			4
Allodynia	1		1	2		3			8	1	1	2	1	5	5							3	1								2				1	2			1							1			1
Coronary artery stenosis						1								1								5
Electroneuromyography				2		3			4	1	2	1		13								1		1											3	1			1										4
Intestinal ischaemia				2	1	1		6	2					1	3				1			6	3						3						1	1										4
Myocardial necrosis marker normal				1		1		1	2		1			3	14						2	2	3												2	1													1
Nasal pruritus						2			1			1		3	2							4	1						1						2
Premature labour	1			6	2	19		5	17	1	2		1	15	1	2					1	10	7	2					8		2				14	13										2		1	4
Sjogren's syndrome			1	3		6	2		33	1	2			5	11							4							1						7	1							4
Bilevel positive airway pressure				2	1	4		1	1					1	3				1			5	1						3		1				2							1				2
Consciousness fluctuating				4		9		4	3	1	3	1		4	7						1	5							6						5	7		1								3			1
Injection site extravasation	31	6	1	9		34		44	16		1	1	1	3	11						1	7	38	1			1		64						6	6					1	1				6
Palatal swelling						1			1					2								1	1																										1
Thrombocytopenic purpura	26	31	4	230	2	23	1	184	171	3	4	1	4	21	51	1	4	1	2			31	143	9			6		83		8	1	1		28	80		13				13		2	1	83		1	4
Yellow skin	1		5	14		18		19	37		5	6		5	22					1		8	10	1			1		12						20	10	1	4				2				12	1		10
Bilirubin urine	3	1	1	7		5		13	6		1	1		3	5							6	5	2			1		2		3				3	4						1				4			2
Cerebral artery occlusion				1																		1							1																	1
Dysgraphia			2	7		18	1	1	27	2	1	3		6	4							7	3						3						3	2							4						3
Intervertebral disc degeneration			3			12			7		4	4	1	12	5						4	11	3						1		13				5				1				9						6
Rheumatic disorder	2		2	4		1	1	1	5	1				6	8								1				1		1		1				1				2			1							3
SARS-CoV-1 test																						2
Activated partial thromboplastin time normal	1	2	1	22		11		20	18	3	2	1		16	9		1				3	8	8	4			1		3		7	1			9	14			1			2	1			6			4
Dizziness exertional						2		1	1																																					1			1
Dystonia	5	9	4	11		12	1	19	26	2	5		3	10	6							3	12	4			1		19		3	1			11	10		2					2		3	10			5
Electrocardiogram ST segment depression						2			2		1			7	4						5	1									3
Haemorrhage in pregnancy				2		4								1															2							1											1
Heart rate normal	1	1	5	22	1	43	1	7	30	3	9	2		5	20						3	6	17	2			1		17		3				55	37										9			6
Intentional dose omission											1											2
Palatal oedema				2		7			1		1			5	1						1	3	1	2							2				2	2										1			2
Skin odour abnormal	4	1		5		5		6	8		1		1	3	2						1	2	4						5		1				2	2										2			2
Ultrasound antenatal screen				12		3			3	1	1			15								13		1					1		1				4	11											1		2
Arterial occlusive disease															1							2
Delivery				4	1	4		1	13		1			23	2							45	1	1					1							13													1
Gastrointestinal inflammation	1		1	5		6		5	1		1			2	2							2	2				1		4					1	2	2						1				5			1
Hepatic failure	3	5	1	7		4	1	12	32	1	2	6	1	4	7	1						6	1	2			1		5		2	1			9	6								1		5			1
Jugular vein thrombosis											2											4													2
Muscle spasticity	3		2	5		13	1	5	27	3	3		3	5	1							18	8	2			2		6		1				3	3		1				2	6			8	1		2
Neoplasm	8	10		20	1	11	1	17	45	1	2	1	1	7	1	1						3	14						14		7	5			7	6		2		4			2			2
Pharyngitis streptococcal	1	3	3	28		12		5	6	1	4	1		8	6	1					1	2	9						11		8	2			8	25			1					1				1	2
Splenic infarction															1							1
Bundle branch block left			1	1					1	1			1								3						1				2					1			1				1
Cardiac stress test abnormal				1		4			1		1										2			2							2				1
Electrocardiogram ST segment abnormal			1											1	2						5		1
Gastrointestinal sounds abnormal						4		13	12		1			3	7							1	6	1					6		1			1	1						1	1				11
Mean platelet volume increased	2	4		4		4	1	7	3		1		1		7						3	1	4				1				3	1			5	3										2			3
Plasmapheresis	1		3	6		107		8	13	8	5	5	5	82	9	1				1		9	4	2					6		1				9	7			2			1				3			10
Scan myocardial perfusion				1		1		2						1	1						2	1					2																2
Cholecystectomy				3		7			2		3	1	1	6										1					1		2				3	1										1			4
Clumsiness	2		4	52		21		20	41	2	3	4		15	4	1				1		4	11	1			1		19		4				24	23	1	5					2			4
Dermatitis atopic	11	1	3	31	1	4		51	37	2	2			4	8						2	11	25	4			5		29		12	1			3	13		1	1		2	6		1	8	18			3
Haemolytic anaemia	9	12	1	15		6		22	63	1	1	1	1	11	16	2						7	14	2			2		24		1	3			5	4				2						15
Lichen planus				1		3			15	3	1		1	10								6									3				2														4
Lip discolouration	4	1	1	7		4		9	9					5	9							5	9	2					9						7	8		1								5
Metabolic function test abnormal				4		8		6			5	1			6					1	1	1	2	2					6		1		1		8	3										8			1
Thalamic infarction						1		1														2
Tooth fracture			2	1		8			1				1	3	2						1	7							1		4				8	3
Blood disorder	2	3	3	6		9		9	24		2	1		7	11				1	1	1	2	6	2					5	1	2				5	4		4						1		10
Chillblains						1
Eye injury				1		2		2	2					1								1		1											3	2
General physical condition abnormal	1			4		2		7	9	1				5	3	1						3	3						1						1	1						1				4			1
Herpes virus test				2		1			4					3							1	3					1		1										1
Intracranial aneurysm			1	2		4			7			1		1	2							5													3	1							1			1
Lactic acidosis	1	2		1		4	1	2	1	2				2	3																1				1	1										1
Low density lipoprotein increased	2			1		3		3	4	1	4		1	7	6						1		2	1					1		3				4	1			1				2			1			2
Nasal oedema	1			6		9		3	3	1	1				3							3	6	1					8				1		3	6		1								1
Red blood cells urine	1			6		1		3	9					2	5							2	3				1		3		1					1													1
Spinal osteoarthritis			1			12		1	5	2	2	2		14	3						2	1	2	1							6				2								8						5
Tonic convulsion	1			20	1	8		33	16	2		1		2	18	1	1		2			7	15	6					23		1	1			12	6		1			1	3				21			3
Toxic skin eruption	3			1		1		8	7		1		1	1	8						1	8	1						2		1					2										6			1
Blood urea nitrogen/creatinine ratio			1			3		2			2				4									1					1		1					2										1
Cardiac tamponade	1							2						4	2							5	1				2
Irregular breathing				4		2		5	4						1							2	1	2					2						1	1
Uterine leiomyoma				1				1	2		1			2	1							4									1															1
Haemoglobin increased	1	1	1	6		4	1	23	12	1	6	5	2	8	10					1		5	8	2					3		3				13	7	1								2	11			6
Henoch-Schonlein purpura	3	2	7	69	1	41	1	29	54	8	3	3		31	22			1		1		8	41	4			1		43						37	32	2	3				5		1		27			15
Nuchal rigidity	51	69	85	120	3	85	10	49	309	25	8	3	10	25	25	3	4			1	6	3	9	17				1	19		19	8	2		21	43							12			8	1		4
Protein total increased		1		6		10		9	5	2	3	4	2	11	4	1					3	7	6	1					5		7				5	2		1								11			7
Renal infarct														1															1																				3
Urticaria chronic				4		4			3			1		3	1							8	1	1							3				5	3													2
Bacterial test negative	8	4	4	43	1	47		56	54	5	8	11	3	49	61		2		1	1	4	13	16	14			15		27		5	1		1	32	30		1	1			3			1	24			13
Bladder disorder	3	1		2		7			14	2	3			2	3						1										4				3	1													2
Cardiac fibrillation			1			3			2													1	1
Carditis	1	1	2	1		1	1		1					1							3	2	2																				1
Cerebellar stroke											1			1
Facial bones fracture			1	3		9	2	2			1			1	3							4		3											2	1													1
Hepatic enzyme abnormal			5	7		8		4	34	1	7	4	2	1	6						2	5	5	1					2		11				35	1		1					3			2	1		26
Hyperleukocytosis	1	1													1							12													1
Neurological examination abnormal	10	3	10	20		40	2	15	78	15	10	5	2	83	22		1				1	6	15	2					22		4				16	21			3			1	4			15			25
Oesophagogastroduodenoscopy						2				1				2							2	3									2				1		1												2
Premature delivery	1			8		11			5		1		2	40	1							45	1	1					5					1	1	5											1		6
Pulmonary fibrosis	1	3	1	2	1	11		1	2		1			22	22			1				82	1						1			1				3							2			2			2
Retinal vein thrombosis									5																																								1
Skin discomfort						4			2					2	2							5													3						1
Stress echocardiogram						1					1			1	1							1		1							1												3
Biopsy lymph gland				1		2		3	3					3	3							3	1	1			1		2							1										1
Blood lactic acid normal			1	8		8		16	12	1	2			8	12	1	1		1		2	3	4	1					7		2				4	6									1	9			2
Gastrointestinal examination						1		1	1						1							1	1						2						1											1
Mycoplasma test	2	2		18		6		15	7	1	1	4		6	16							6	8	2			2		6						13	11									1	3			1
Subclavian vein thrombosis											1	1										1													1
Vitamin D deficiency			1	3		7			7	2	2	2		6	6							1	4						3		2				4	1							1			2			2
Walking disability	2	1	1	7		4		3	13		1	1		3	2								4						2		1				3	2			1							2			4
Anti-platelet antibody				1																		4	1						1						1	1
Blood creatine phosphokinase MB increased	5	2	1	2		9		12	7	1	13	1		4	12						51	2	16	2			1		3		28		1		5	2										4			4
Breast cancer						6			8		1			2	2						1	1									2												1						2
Coagulation time				1										1	1							3
Foetal hypokinesia	1					2			1					8								3	2						1
Head titubation	2			6		11		8	10		1		1		2	4						7	7	1			1		10						4	5		1							1	11
Hyposmia						4								10	2
Metabolic acidosis	5	2	1	6		9		25	21	1	1	2		7	14	3	2		1			9	7	4			4		11		1	1		2	3	4		2								17			1
Nitrite urine absent	6	3	1	10		8		23	13		1			8	14						1	5	9	3			1		6		7				6	5										4			2
Tendon disorder	2	1	20	2	2	67		1	47	3	3	2	7	23	21		1				1	3	5				1		3		10	2			6								10				1		2
Tooth infection				1		2								2	3							4																											2
Visual field tests						5			2		1			2	2						1	2												1	1														1
Antinuclear antibody increased			2	2		8			5	2	1		1	7	4						1	2	1	1							1				3	1							1						6
Blood pressure diastolic increased						1								3	1							14																											1
Congestive cardiomyopathy			1	1		1		1	6	2	1			2	2				1		2	3	2	1			3		1		1				2	3										1
Dialysis				2		13		1	13	1				8	4							4							1							1										1
Hepatitis C antibody								1	1													5													1
Impaired healing		1	3	11		6		3	6	1	1	1		2	2	1					5	11	3	1			1		4		3	1			2	2		1			1					2			1
Abdominal rigidity	2		2	1		4	1	8	4	1	4			2	2							1	4	1					2						3	1								1		7			2
Abortion missed				7		1			2		2		1	3							1	2									1				7	4													3
Hypovolaemic shock						1		3				1		1									1						1																	1
Infusion				2		2			1					1	3									1			1		1																	1			1
Legionella test			1	3		1		2	3	1	1	3		2	12							2	3	2			1								3	1													1
Tachyarrhythmia			1			5			1	1	1			2	2							1																											1
Ultrasound liver				2		3			2			1									1	4													3	2
Auditory disorder				2		1			1	2												3													1	1													1
Autoscopy						1			1													2
Discharge				1					1						1						1														1
Electrolyte imbalance	2	2	1	5		10		8	5	6	2	2		4	6							3	9	1			1		8		3				5	3		1		1						9			1
Endocarditis	1	1		4		5		1	6		1	1		5	6							1		1					1		1				1	4										2			1
Enterovirus test				5		3		1	1			1		2	1						1	3		1					1						1	1				1						1
Genital haemorrhage									1		1										1										2					1										1
Iritis			2	1	1	15		1	11	1	3			4	2	1					4	1	2								2				2	3							3						3
Neutrophil percentage decreased	24	14	2	42		20		141	55	2	4	4		8	61				1		5	12	85	9			5		32		4	2			25	23	4	1				4			1	52			4
Small fibre neuropathy						4			3	2	2		1									3									2
Ultrasound uterus			1																			3													1
Varicella	7	3	4	334		51		94	44	1	1	1	4	22	17	1				1	4	19	87	1			2	1	112		1	1			146	1679	1	12			1	1		4		102	1	2	6
Atypical pneumonia						2					1			10	6							2	2						1							2										2			1
Bronchoscopy				2		5		3	2		1	1		6	7							6	2	1							2				1	1										2			1
Culture negative	15	1	3	41		44		75	33	4	6	6	2	73	66	1				2	6	9	44	4			5		31		6	9			29	28		1				2	1	1	1	45			6
Foreign body sensation in eyes						23			1	1	1	1		3	1																				1														1
Functional gastrointestinal disorder	1	2	1	4		9		4	4	1	2	1		1	7							2	1						3						2	3										2
Liver injury	1			3		4		3	3	1	2			4	3							4	6	3			1		3						3	2													4
Medical observation				1		1		1															1
Transferrin				1					1													1														1
Vaccination site irritation				4				7							1							2									1				1	2					2	2				1
Albumin globulin ratio						1		6	1					2	5		1		1			2	8						1							2										1
Brain stem infarction				1						1				1																								1
Electrocardiogram ambulatory normal				1		3		1	4	1		1			1						1								1		3				2								1			2
Eye oedema	2	4	7	92		57	1	25	43	7	1	2	1	4	5	1		2			9		55	2			1		77		2		1		23	45		5					3	1		29			5
Haematocrit increased		1		5		5		6	8	2	4	2	1		5							5	4						5		1				10	6			1							4			2
Mania	1		1	3		2		2	5		1	2									1	2	2	1					1		1				4	1										1
Postictal state	4		1	71		44	1	84	28	3	1	1		14	8							4	51	9			1		83		3				68	49		9	1							57			4
Spinal myelogram				1		2			2					2	1							15
Sudden cardiac death						2					1	1		1	1														1						1
Transferrin saturation				2		3					1			1	1						2	1	2								3				2
Cardiac ablation						2					1			1							2										1
Chemotherapy		1		19		7		5	12		1		1	11	10						2	7	1	3					2		3				6	14							1						7
Hepatitis acute				1	1	5		3	7		1			4	2					1		4	4	1					1						3				1				1			1			7
Injection site lymphadenopathy			1	2		3	1	1	1					1	3							2	1	1					6						1	5										1
Platelet disorder	4	4	3	25		6		13	19		1	1		2	3	1		1			1	6	11				1		13			1			3	10		2	1							10			5
Accidental exposure to product				30		17		11	12	4	3	3		3	11		1					12	2				1		5						7	29										1			4
Allergy test negative	3		1	24	1	35		19	20	1	4	1		12	7						2	1	13	5			2		20		4				15	12		3								18			3
Aneurysm						6		3	1						2								2						3						1	1										2			1
Blood cortisol			1	2									1	1	1							9		1							2					2
Blood iron normal	3		1	4		4		2	7		1	1		3	5						2	1	4						1		2				8	1										2			3
Conversion disorder	7	7	3	19		9	1	13	20	3				1	4	1						5	10	3					16			1			4	5		3				1		1		7			4
Haemolysis	3	4	2	16		5	2	18	26	1	1	1		2	13						1	7	10	7			1		19			2			7	6		2			1				1	8			1
Hyporeflexia	22	23	25	31		104	4	32	97	9	6	3	9	72	23	2					1	5	27	1			1		19		3	7			14	7		1	3	1	2	1	2	1		8			14
Injection site abscess	123	104	137	123		91	25	224	136	1	6		16	28	119					1	20	22	127	7	3		25	1	187		11	36			48	79	1	31			1	2		2	3	104		1	5
Mean cell haemoglobin increased	1		2	4		6		4	15		4	2		1	7						5	6		1			7		3		6				5	3							1			2
Mycobacterium tuberculosis complex test				2		4		2		1			2	2								6	1				2					1				1
Pelvic venous thrombosis																						1
Red blood cell nucleated morphology				3				2							2							2							1						1
Sense of oppression			1	2				1	1				1	2							1	2	1	1			1		1																	2	1		2
Stevens-Johnson syndrome	4	4	2	28	1	31	1	20	27	3	4	5	2	18	13	1		1			3	10	11	3					15		5	1			17	18										8			2
White blood cells urine	1			2				3	2													5	2	1												1											1
White blood cells urine positive	10	2	2	14	1	9		32	40	3	4	3		11	21							5	17	6			8		16		1				12	8						4				23			3
Biliary colic						1			5						2						1	4	1	1											1														1
Blood urea decreased	2		2	9		7	1	17	18	2	4	1	1	10	10						2	1	9	1			5		8		6				8	2	1					1				18
Electrocardiogram T wave abnormal			1			3			1		3			1	3						6	1		1							4				3	1			1										1
Epigastric discomfort			1	1		2			2	1	2	1		3	3							4	1													1													1
Epstein-Barr virus antibody positive		1	3	13	1	15		6	11	1	10	3	1	9	5	1				1	12		10	8	1		2		2		10				7	6	1		3			1	3			1		1	9
Epstein-Barr virus infection		1		10		4		5	12	6	3	1	1	8	3					1	3	9	1	3					4		1				5	1										3			3
Gallbladder disorder			1			5		1	8		5			1						1		4	1						1						6	1					1		1			1			4
Occipital neuralgia			1																			2							2
Ophthalmological examination normal	4			11		9		15	11	4	5	2		8	2	1						6	11	2			2		12						11	14	1									19			7
Protein total decreased	3	1	2	4		13		34	23		10	3		18	17		1		1	1	4	8	22	1			7		11		5	1			6	4			2		1	2				12			4
Strabismus	19	16	6	82		17		93	54	3		1	2	10	9	2	1					17	57	8			3		80		2	6		2	26	33		11	1			3	1	1	2	55		1	6
Tachyphrenia			1			4			2		1	2			2							1													3	1
Vitamin B12 decreased				1		2			4	1	1	1		2								2		1											3														3
Aspiration pleural cavity						4			1					2	4							1									2				1											1
Blood ketone body				2		3		2	3		1			1	3						1	2		1					1		2				3											1			1
Cholestasis				1		2		2	7		1	1		6	1							14	2						2						5	1										2			6
Colonoscopy abnormal				1		3		4	7	1	1	1		6	2						2	9	1						4		6				4	1			1				1			3		1	4
Hepatitis viral test				1		8	1	2	9		1		1	4	4							2	1						1		3				7	1										1			3
Pregnancy test positive			5	74	1	8	1		21		16	3	3	4	1						14	5	6	7					9		30		1		32	141											1	1	9
Procalcitonin increased	12	1	1	17		4		22	12		1	2		4	41							6	22	7			4		8						2	5						1			1	6
Tri-iodothyronine free	1		1	1				1	3		2				2							2	2				1		1																				1
pH urine			1			1		2	1																				1																	1
Arteriogram coronary normal						4			1		3			6	1						7			1							3						1
Feeling of despair				1		2			1					1	2							6													1						1
IIIrd nerve paralysis				7		4		2	13					7	3							1		2					1						3	3													1
Premature baby	1	1	1	13		8		8	11		4			61							1	63	7						9		1	1		1	9	14		1				1				16			2
Vaccination site joint pain	1							2						1	1							1	2
Back injury	1			2		4			2		1			1	3							7									2					1							4
Blood cholesterol normal			2	8	1	9		5	12		5	2		7	6		2		1		7	2	5	2			1		1		5				9	5						1				4	1		3
Foetal growth restriction				4		4			1	3		3	1	9								9														1
Food intolerance	1	1	1	21	1	8		13	13	3	3	1	1	7	3					1		13	5	2					11		2				9	8					2	1				5			4
Lung consolidation	2	1		4	1	5		4	4	2	1			7	5				1			2	1	1											2	1										4
Mucous stools	11	5		11		7	1	163	88		4	1	2	8	29						1	14	52	3			3		64			1			6	3	1	4			1	4	1	3	1	101			1
Oral mucosal erythema			1	16		6		8		1	1			1	4							3	1						5						5	8			1			1				2			1
Stool analysis normal	7	2		15		5		32	17	2	10	3		2	36	1			1		1	3	24	5			1		16						13	7		2								19			9
Tooth disorder	1	1	2	5	1	6		7	14		1	1		6	1						1	8	4	2	1				7		3	1			3	4		1				1	2			1		1
Ultrasound biliary tract	1			1		3		1	1			1		4	1						1	4	4																										1
Ultrasound foetal abnormal														1								4
Blood pressure diastolic decreased						2				1				1	1							2
Breast inflammation						2									1
CSF white blood cell count		1		3		1		6	2			2		2	2							2	5						1						3	4										3
Cardiac dysfunction																						2
Cytology						2								2								5
Electrophoresis														2								3
Eyelid irritation						3									1							1																								1			1
Haemodynamic test																						5
Non-cardiac chest pain				2		8			1		1	1		6	8						1										3							1					2
Oxygen saturation abnormal	1			3		5		4	1		1				3							2	1													2										4
Spirometry				1		4								5	7							3
Varicella zoster virus infection				12		1		3		1				1	5							1							1		1				3	23													1
Anion gap decreased				1		7		2	2		1			1	4								2						1		1				1	2
CSF culture	1			6		4		15	14	1	2	1		3	4					1	1	2	4	1					9			1			4	5										5			2
Cerebral haematoma			1						3						1							3							1						1											1
Narcolepsy				4		30		1	10	3	5		2	45	4								1	3					1		3				2	1			1				1						3
Reaction to previous exposure to any vaccine		1	3	14		9		5	9	1				7	4							2	13	3					12		1				8	13		2								13			3
Skin erosion			2	2		1		4	1	2		1		4	6							3							1							1
Symptom recurrence				1										1	1							2
Arteriosclerosis coronary artery						1								4	5							4
Blood magnesium decreased		1	2	5		4		2	6	1					4							4	4	2					4		1				2	1										6			1
Hepatitis C				1					7		1		1	1	2							6		1							2				4	1													3
Hypercoagulation				1				1														3		1					1		1					1
Monocyte count decreased	1			5		2		6	3		2	1	1	3	2						4	1	3	1			1		2		1				2	3										4	1		3
Otitis media	605	625	7	1012	2	95	24	1026	300	4	7	3	1	18	43	9	4	8	1		9	37	226	18			4		419		14	147	2	1	83	400	1	62		4	5	2	2	7	1	313	2		5
Pigmentation disorder	1		1	6		4		15	10		1	1		1	2		1				1	6	6				1		6		2				3	6					1	1				3			3
Angiopathy	5	6	1	10		13	1	10	34		1	1	2	3	5					1	2	1	7	1	1		2		7		2	3			7	2							1		1	1			1
Blood folate normal	1		1	2		18		1	14	1	8	3		16	7						8	2	2	2			1		1		9				12	1													1
Blood pressure systolic decreased			1			3		1		4	1			2	6		1		1			2													2	3													1
Breast cyst																						1													1	1
Corneal reflex decreased			1	5		9		1	1			1		3	1														1						3	5										1			3
Factor V Leiden mutation			1																			2									1					1							1
Hiatus hernia				1		2			6		1			2	1							3	1				1				5												2						2
Prenatal screening test				7		4				1				18								37														3
Rheumatological examination									1
Small intestinal obstruction				1		3		9	5						2							2	4				1		4						1								1			6
Stillbirth	1			8	1	13			8	1			1	18	1							5	3						1						2	4						1							1
Upper limb fracture	1			1		1			1					10	1							4																								1
Antineutrophil cytoplasmic antibody negative	3		2	3		13		1	29	3	5	5	1	57	10					1	1	7	4	2			1				7				9	1			1			1	1						10
Back disorder				2		1		1	7		2			3	1						2	6									3				2								3
Coagulation factor				1																		12		1							1
Craniocerebral injury				4				1	2			1		1	1								2								2				1							1							2
Electrocardiogram QT prolonged			2	2		3			2	1	2			6	2						3	35	1								2				4	1													1
Emphysema	1		1			8	1	2	3				1	24	17								4						3		1				1	1										6			1
Laryngospasm	12	22	65	84	3	250	5	23	244	26	10	8	8	43	29		1		1			6	14	6					18		11	1	11		25	14		3					5			7
No reaction on previous exposure to drug	4	3	12	47		217	3	44	53	8	12	4	2	67	82						4	2	61	7					69		12		1	1	43	52			2				1	1		38			40
Ophthalmoplegia	2	3	1	16		31		5	42	2	1	2	1	16	6	1						4	4	1				1	7		1	1	2		8	6			1							1			9
Performance status decreased				3		1			4	1												1													1				1										7
Respiratory tract irritation	1		1	2		7		1	1					2								1													1														1
Bacterial test positive	6		1	11		18		24	23	4	2			11	19						1	9	5	5			3		7						9	4										29
Blood calcium increased	1	2		6		8		21	10		4	2	1	12	7		1		1		3	77	9	2			1		14		3	1			2	6		2							1	19			2
Blood uric acid normal		1	2	9	1	9		5	13	2	5	2	2	7	8		1	1		1	1	1	2	1			1		3		4	1			9	3						1	2			8	1		4
Brain scan normal			1	6		11		10	19		1	1		3	4						1	7	11	2			1		12		1				2	2										16			2
Enteritis	5	3	3	21		3		16	16	1	7				4							7	13	3					10						4	8		1	1	1					1	8			3
Fracture		2	5	1		3	1	4	9			1		2	6	1						4	6	1			2		5		2	1	1		5	2							3		1	4		1	2
Haemostasis														1								3
Hepatitis B	2					1		1	182					1	3							9					1								2														13
Platelet distribution width	6	3	1	4				23	5			1		2	11							5	17				3								2	1	1									2			1
Sleep study	1			4		11		2	9	2				7	2														2		4				4	1										2
Tongue eruption				2		2		1	1				1	3	1						1								2						1	1
Tumour marker test				1		3			2					5								2					1																						1
Balance test			1
Bladder catheterisation				9		13		9	7	1				12	4							3	1						5						7	9						1			1	1		1	1
Dyschromatopsia				2					4					1								2																	1			1							1
Embolism venous																						2							1
Increased viscosity of upper respiratory secretion				1		2				1				1	1							4													1
Inner ear disorder			1	6		3	1		2	1	1	1		6	1												1								1				1										2
Magnetic resonance imaging thoracic				1
Ovulation pain
Panic disorder						3				1		2		3	1																				1
Transverse sinus thrombosis
Anion gap normal	1			3		8		6	7			1		1	2						3		3						1		4				4	1										2			2
Anuria	3	1		1		10		9	6		1			4	12		1					1	4	1					3						2	3										4			1
Cerebral small vessel ischaemic disease				2				1	5					4									1																				2
Chlamydia test			1	1				1	4	1	1	2		1							2	6													1	2
Enterovirus test negative	3	4		35		7	1	17	32	2	7	6		16	17				1	1	4	4	7	6			12		11		3	1			17	18						1				7			3
Injection site muscle weakness															1							1							1
International normalised ratio decreased						3		1			1	1		5							1	1	1	1							2															1			1
Intraocular pressure increased				4		4		1	3	1				6	3							13	1	1												7							1						2
Left ventricular failure									1		2			4	1						1	2					1								2
Pericardial drainage						1		2						4	2							2		1			2
Peripheral embolism
Romberg test			1	2		2			2	1	2	1										1	2	1					1						3
Sexually transmitted disease test											1	1										1														1
Specific gravity urine normal	4	2		11		10		21	27		1			11	10							10	15	2			10		9		7				9	13										5			1
Thyroid function test abnormal	1		1	2		1			1	2	1	1		4	2							2		1					1		2				4	4										1			2
Vaccination site infection			1	6		2		2	2					2	14						5		1				1								1	3					1					1
Blepharitis	1			2		2			3					3							6		1								2				1								1						2
Enuresis	1	1	3	17		8		5	14	1	4			1	3							1	8				1		18						16	10			1			1				2			5
Joint warmth			1	7		5		1	4					1	12						1	4	3	2					5		1															1			1
Mean cell haemoglobin decreased	10	6		25	1	11	1	36	33		3		1	5	18		2		1		3	6	24	3			6		12		2	1			16	16	1					1				11			4
Myocardial strain																						1
Personality change	4	2	1	58		5	1	25	19	2	2			7	11	2						13	17	1					32		1			1	17	22		3			1		1	2	1	11	1		3
Aortic valve incompetence						2		1	1					2	3																												2
Atrial tachycardia						1		1	2	1				2									1						1								1									2
Blood smear test	1		1	3		1		5	3					2	1							1	2	1			1
Culture throat				35		22		8	7		1			10	5	1					3	3	4	4			1		12		1				21	21			1							10			1
Epstein-Barr virus test negative	1	2	1	49	2	23	1	10	34	8	10	15	1	35	12						3	13	15	17			2		14		4	1			28	20	3									9			6
Glucose urine absent	8	2	1	11		10		26	11		1			5	10							4	11	3			2		6		5				6	7						1				5			2
Granulocyte count		2	1	1		2		5	3		1			1	7						2	19		1					1						4											4	1		1
Impaired gastric emptying			2	3		4		1	5			1	1	1	2						1	1	1						1		6				1	3		1						1		1			1
Laparoscopic surgery	1					1		8	5	1	1			2	1							1	3						3						1											2			2
Low density lipoprotein normal			1	2		6		2	3	1	5	1		3	5						7	1	3	2					1		7				5	1			1			1				1			3
Menstrual discomfort									1
New daily persistent headache			1								1	1		1																						1
Oesophagitis	4	3		7		12	2	9	15			1	1	7	3							3	7						7		4				3	3		2		1			2			4			2
Oxygen saturation normal	1		3	24		47		24	22	2	6		1	6	13						3	7	31	4			3		30		3		1		32	25	1	3						1		46			3
Red blood cells urine positive	1	2	1	5		9		9	26	3	2	1		18	19							5	9	1			7		13		2				9	5		1				1				5			5
Tooth abscess			1	2		1		2	1	1		1	1	1															1						1	1
Bone swelling																						1
Breath sounds				2		1		2						1									2	1					2														1			1			1
CSF glucose normal	1	2	6	40	1	40		43	37	11	10	18	1	46	24						5	8	21	7			2		21		7	1			20	32	1	3				2		1		27			20
[truncated: 13,322 more rows]
[truncated: 47 more columns]
